# Supplementary material
Source: PubMed Central journal article supplement (PMC2862215)
Supplement: NIHMS186330-supplement-1.pdf [file NIHMS186330-supplement-1.pdf]

# Supplementary Results

## *Proteome statistics*

The PeptideAtlas build was constructed using the sequence search results of 108,000 correct MS/MS spectra ( $P \geq 0.9$ ). We identified 16543 unique peptides at a peptide false discovery rate (FDR) of less than 1%<sup>1</sup> which represented 2221 proteins at a protein FDR of less than 1%. Overall, the identified proteins matched to 62% of the predicted gene models and contained 75% (1291 proteins) of the known or characterized proteins, 51% (85) of the proteins with putative function and 49% (867) of the hypothetical proteins. The data was compiled into a publicly accessible instance of PeptideAtlas<sup>2</sup> to facilitate further studies of Leptospirosis employing targeted proteomics. We used Gene Ontology (GO)<sup>3</sup> to group the identified proteins according to their cellular function. The largest GO groups of identified proteins were metabolic enzymes (22.5%; 501 proteins) and proteins that are not associated with a specific cellular process (50%; 1123 proteins). About 12% of the proteins were associated with the functions “transcription”, “translation”, “protein folding” and “protein degradation”, while only 0.5% were associated with the function “stress response” (Supplementary Figure 1). The estimated false discovery rate (FDR) for spectra in the atlas is 0.006, and the combined sensitivity is estimated at 90%. All the data is available for browsing and downloading at <http://www.peptideatlas.org/>.

## *Stress-induced changes in the Leptospira proteome*

We used inclusion list based to relatively quantify changes that occur in the Leptospira proteome as a response to stress (Figure 2). Overall, this procedure allowed us to identify and quantify ~1000 proteins in each cell state tested, corresponding to ~45% of the observable proteome (Supplementary Table 3).

*Starvation state:* During starvation, the cytoplasmic concentration of most protein complexes involved in metabolic reactions and protein folding was reduced at least 2-fold (Figure 2). This was associated with significant morphological changes of *L. interrogans* cells from an elongated shape with a single cytoplasmic membrane and cell wall layer to compact cells with several membrane layers (Figure 2). This to our knowledge so far uncharacterized cell form for this species turned out to be unsuitable for template matching because its larger diameter interfered with electron beam penetration. Some of the proteases, particularly Lon, HtpX, aminopeptidase A and metallopeptidase M20 were up-regulated. The data also verified several previously observed proteomic changes such as the decrease in sporulation stage II anti-antisigma factor SpoIIAA levels<sup>4</sup> and the 2.5 fold increase in Dps, a protein providing DNA protection during starvation. Overall, the observed pattern of

proteomic changes is consistent with the transition of the cells into a resting state with a stalled metabolism.

*Ciprofloxacin treatment:* Ciprofloxacin is a commonly used drug against Leptospirosis and inhibits DNA-gyrase<sup>5</sup> that causes the cell to compensate for the DNA-topo-isomeric stress by an up-regulation of recombinase A<sup>6,7</sup>. After 24h of antibiotic treatment with 5 µg/ml Ciprofloxacin we observed a fifteen-fold increase of recombinase A, whereas the ribosomal concentration decreased by 25%. A fifteen-fold decrease of DnaK-suppressor resulted in a three-fold DnaK abundance increase, whereas DnaJ, clpX and clpP remained unchanged. While the concentration of the unfoldase clpB increased by ~50% the concentration of the Hsp15 proteins decreased by thirty- to forty-fold (Figure 2). Under the chosen conditions antibiotic treatment did not result in significant morphological changes. These changes were accompanied by a massive up-regulation of a cluster of proteins of unknown function that have so far been annotated as hypothetical (Figure 2). Using proteome wide absolute abundance determination we estimate that the fraction of the total cellular proteome represented by the products of these genes increased from less than 1% to 20% upon antibiotic treatment<sup>8</sup>. Also, most of the proteases and cytoplasmic proteins involved cell shape determination and division that were targeted, did not exhibit significant changes (Figure 2). Despite the presence of increased amounts of DnaK-suppressor we were able to detect two transcription factors of the TetR- and ArsR-family that underwent pronounced changes in abundance under these conditions. They might be key regulators for the formidable adjustments of protein expression we observed. Another candidate for the transcriptional control of these processes is the product of gene LIC10526: The heat-inducible transcriptional repressor was below the detection limit in control cells, implying a very low abundance, but seven-fold enriched in heat-shock and antibiotics-stimulated cells as compared to the starved condition. The gene product of LIC20013, a CheY-like response regulator of the chemotaxis system, was strongly induced under heat-shock as well as antibiotics-stimulated conditions. In contrast, an entire set of seven additional CheY-proteins showed no response<sup>9</sup>. Obviously, *L. interrogans* cells undergo substantial adjustments in the proteome when reacting to stress induced by antibiotics.

*Heat shock/fever state:* After 1h of stimulation at 42°C the concentration of two gene products, Hsp15 and Hsp15-like, increased by more than ten-fold (Figure 2), while most of the other complexes involved in stress response, e.g. the proteins of the clp system and Hsp90, remained unchanged. DnaJ and DnaK were up-regulated by 60-75% (Supplementary Table 3). These changes are consistent with the response to heat induced protein unfolding. In contrast to the starvation state, heat shock treatment did not induce significant morphological changes.

### *Noise models and generation of Phantom cells*

We initially generated test data sets (phantom cells) *in silico* that contained the selected target protein complexes at the relevant sampling rate, contrast transfer function (CTF), modulation transfer function (MTF) as well as angular coverage of a real tomogram and adjusted the noise level with a kernel corresponding to the distribution of the electron optical density observed within non-occupied regions in real datasets. In such simulations the majority of the chosen template protein complexes were detected with good confidence (not shown). However, a recent detailed analysis of the noise components in single particle cryo electron microscopy has indicated that the noise models used to date and in our experiments mentioned above might not be adequate. It was shown that structural noise (caused by the structural diversity of the macromolecules themselves) is of the same order of magnitude as the other noise components<sup>10</sup>. Since this finding might imply that the structural diversity of the targeted macromolecules could influence the cross-correlation intensity to such an extent that true matches are difficult to discriminate from pure noise correlation, we decided to account for this problem in the test data (see main text).

### *Detection of ATP-Synthase and Hsp15*

The detection of ATP-Synthase is complicated by an angular bias problem: The cross-correlation intensity is dependent on the spatial orientation. Since membranes are highly entropic structures and the electron optical density is higher inside of the cells than outside false positive hits can match to the membrane domain but still to incorrect positions. This finding illustrates the difficulty of detecting membrane proteins and is further complicated by the 'missing wedge' problem that can introduce an angular bias to the detection. By filtering out 'top and down' views the performance can be improved up to 60% specificity but on the cost of sensitivity (angular bias correction).

Small heat shock proteins have been shown to form different oligomeric states *in vitro* in some<sup>11</sup> but not all investigated species<sup>12</sup>. The structure most closely related to Hsp15 (pdb\_2BYU) that served as a template in this study forms a dodecameric assembly. We have also matched a tetracosameric form (pdb\_1shs) as an alternative, but observed lower cross-correlation intensities. Nevertheless, if a protein complex is not fully assembled or the oligomeric form present in the template database is not the predominant form in the cell, the separation of false from true positives is blurred.

## Supplementary Figures

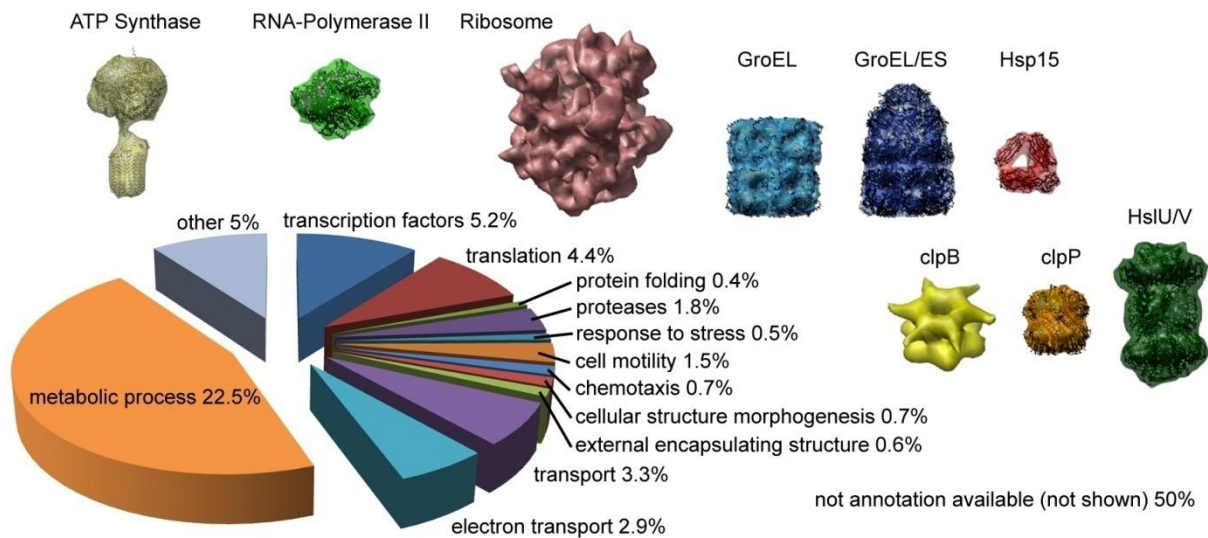

**Supplementary Figure 1.** Proteome of *Leptospira interrogans* with an emphasis on conserved protein complexes of known structure. 61% of the open reading frames in *Leptospira interrogans* were identified by shotgun proteomics (data available at [www.peptideatlas.org](http://www.peptideatlas.org)). The distribution of the assigned function of the identified proteins (based on GeneOntologies) is shown as a pie chart, where the genes without any annotation available (50%) were omitted. Conserved protein complexes (Table 1) that have been localized in electron tomograms by template matching (see below), are shown as surface rendered views, superimposed with amino acid chain traces (in black, if applicable). These protein complexes are: ATP-Synthase (ATP generation); RNA-Polymerase II (transcription); ribosome (translation); GroEL, GroES, Hsp15 (protein folding) and clpB, clpP, HslU/HslV (protein unfolding and degradation). The templates have been filtered to 4 nm resolution ( $1^{\text{st}}$  zero of CTF) for template matching (Supplementary Figure 2).

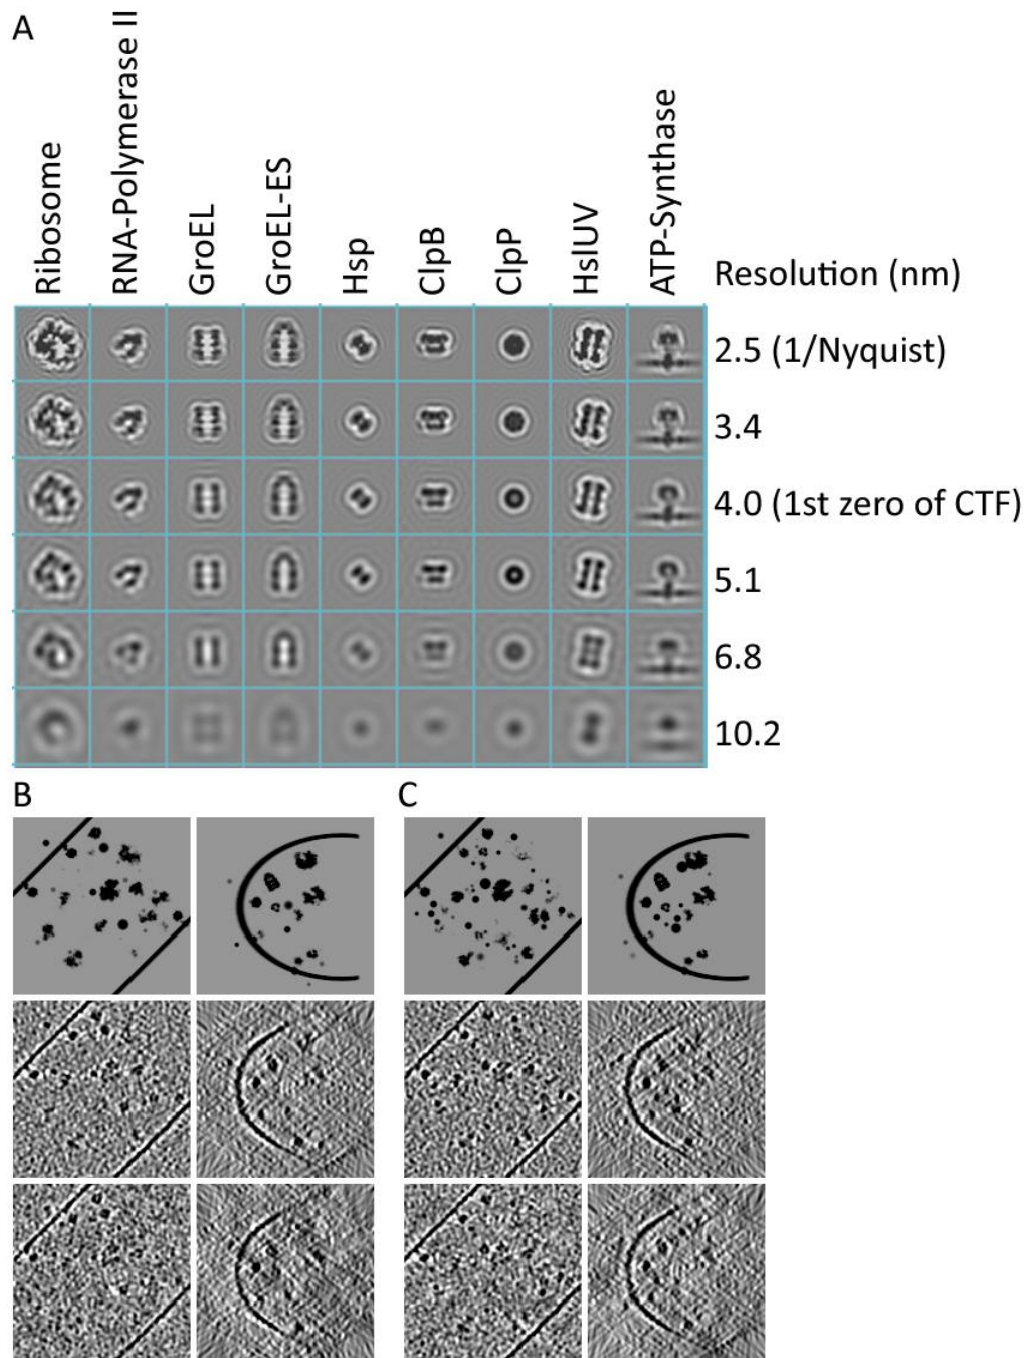

**Supplementary Figure 2.** CTF-convoluted templates and the effect of molecular crowding. (A) Template library after convolution with CTF, low-pass filtered to the indicated resolution. The chosen templates are distinct up to a resolution of  $\sim 5$ nm. In case of ATP-Synthase a disc shaped density (5 nm radius) was added around the transmembrane domain for template matching. (B-C) Same as Figure 3A and B but for *in silico* test data (phantom cells) in which a moderate (B) or high (C) number of spherical decoys was placed to the periphery of the templates to simulate molecular crowding. Notably, at the given resolution of cryoET this effect has a similar influence as structural noise in single particle electron microscopy: If additional mass (representing other proteins in the local proximity within the cell) is present within the area in which the local cross-correlation is calculated it

will cause a decrease in the observed cross-correlation intensity. Although, our chosen template protein complexes comprise for a significant proportion (~25%) of the total cellular protein<sup>8</sup> we have investigated this effect by adding spherical shaped decoys into the proximity of the target proteins complexes in phantom cells in separate test runs: When a moderate number of decoys was added to the empty phantom cell space the discovery rates of all templates decrease slightly. However, if a massive amount of decoys with in part higher electron optical density than the target protein complexes was simulated, the performance was affected to such an extent that only the very large protein complexes (Ribosome, GroEL/GroELS and HslUV) could be discriminated from pure noise correlation. Unprocessed cells are shown on top, cells processed with the conservative noise model (SNR 0.5, even quantum and detector noise contribution) in the middle and cells processed with the optimistic noise model (SNR 0.05, predominate quantum noise contribution) at the bottom.

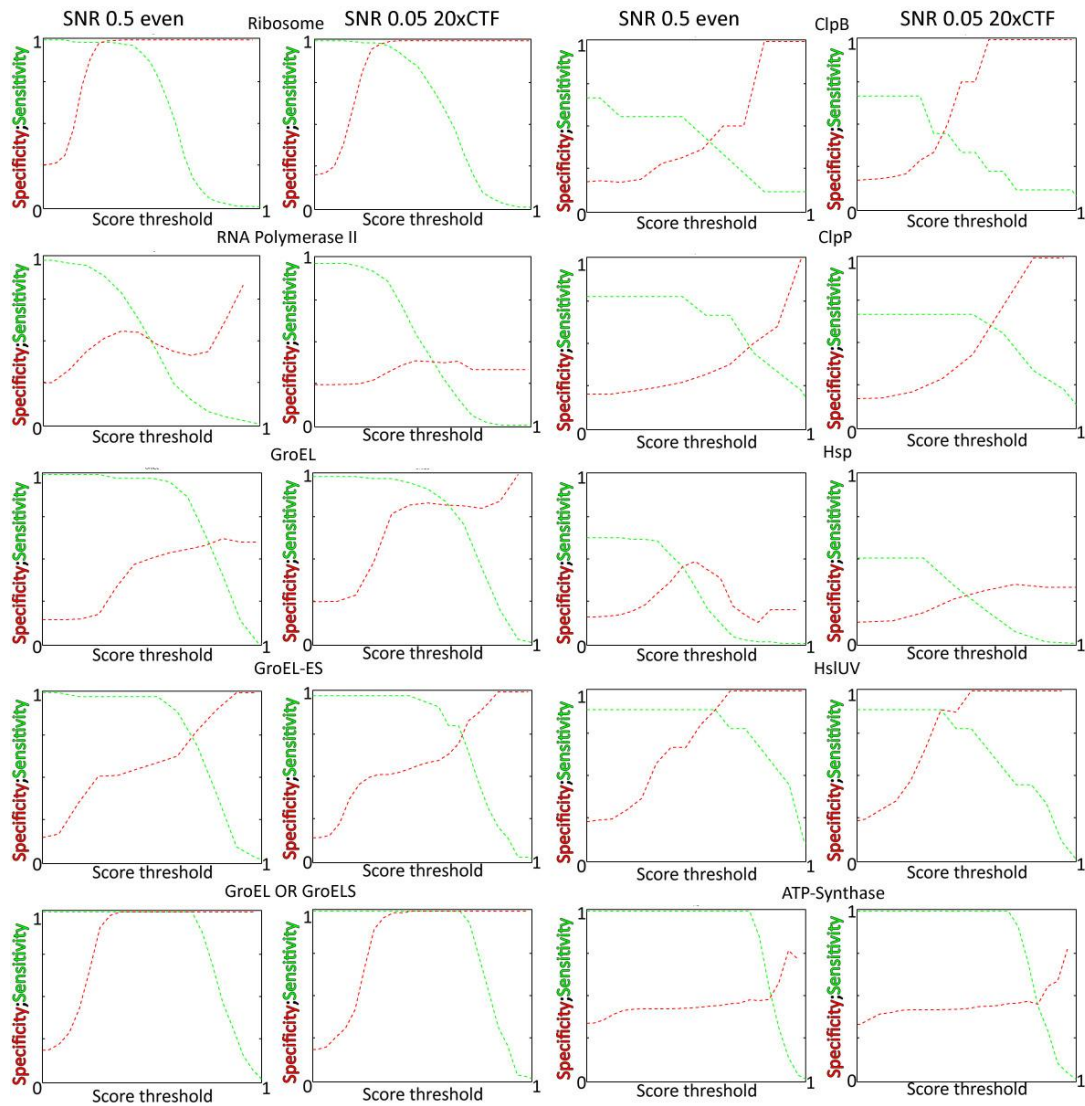

**Supplementary Figure 3.** Performance of template discovery in *in silico* test data sets (specificity in red, sensitivity in green). Curves for all templates and both noise models discussed in the main text are shown (in case of ATP-Synthase without angular bias correction). In cases in which the red specificity curve goes through an optimum the true from false positive discrimination is poor and the performance will be largely dependent on the template abundance in the cell.



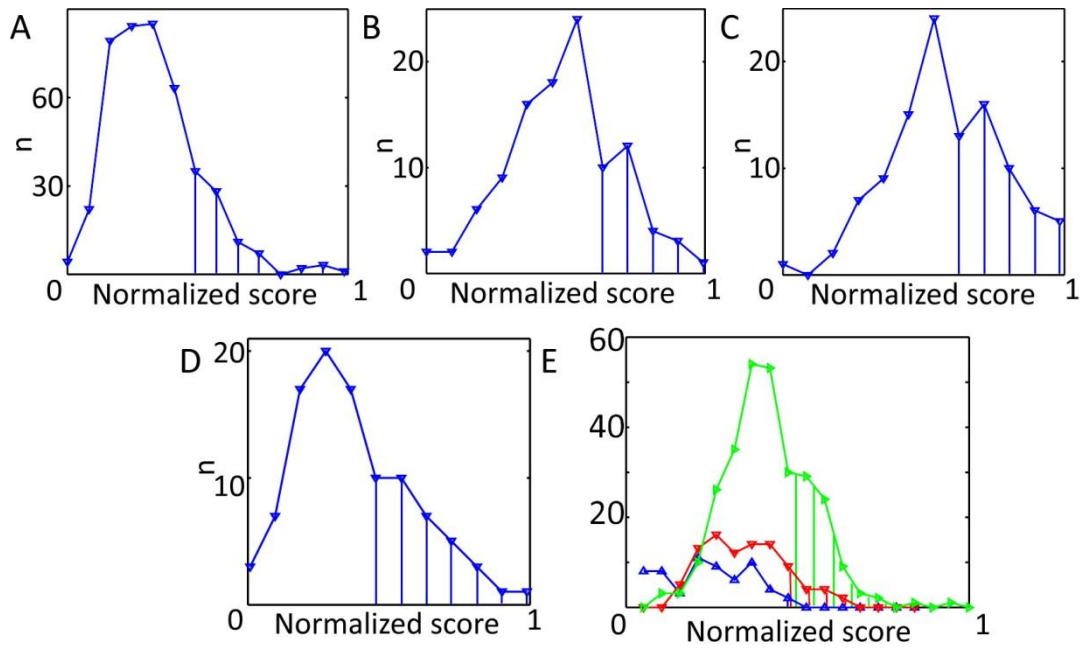

**Supplementary Figure 4.** Score distributions from selected real data sets of the Ribosome (A), GroEL (B), GroEL-ES (C), ATP-Synthase and Hsp (E) as shown for RNA-Polymerase in Figure 3. The area under the curve marked with vertical lines indicates the absolute abundance of these protein complexes in the respective tomographic volumes as determined by SRM mass spectrometry. In case of GroEL and GroEL-ES the abundance of GroEL alone has been used to fill the area and both distributions due their curve shape, since *Leptospira* cells express GroES in excess to GroEL. In case of Hsp15 the score distribution from tomograms of similar volume of the untreated (blue), heat-shocked (red) and ciprofloxacin-treated state (green). The statistical model improves with the increasing cellular abundance of Hsp.



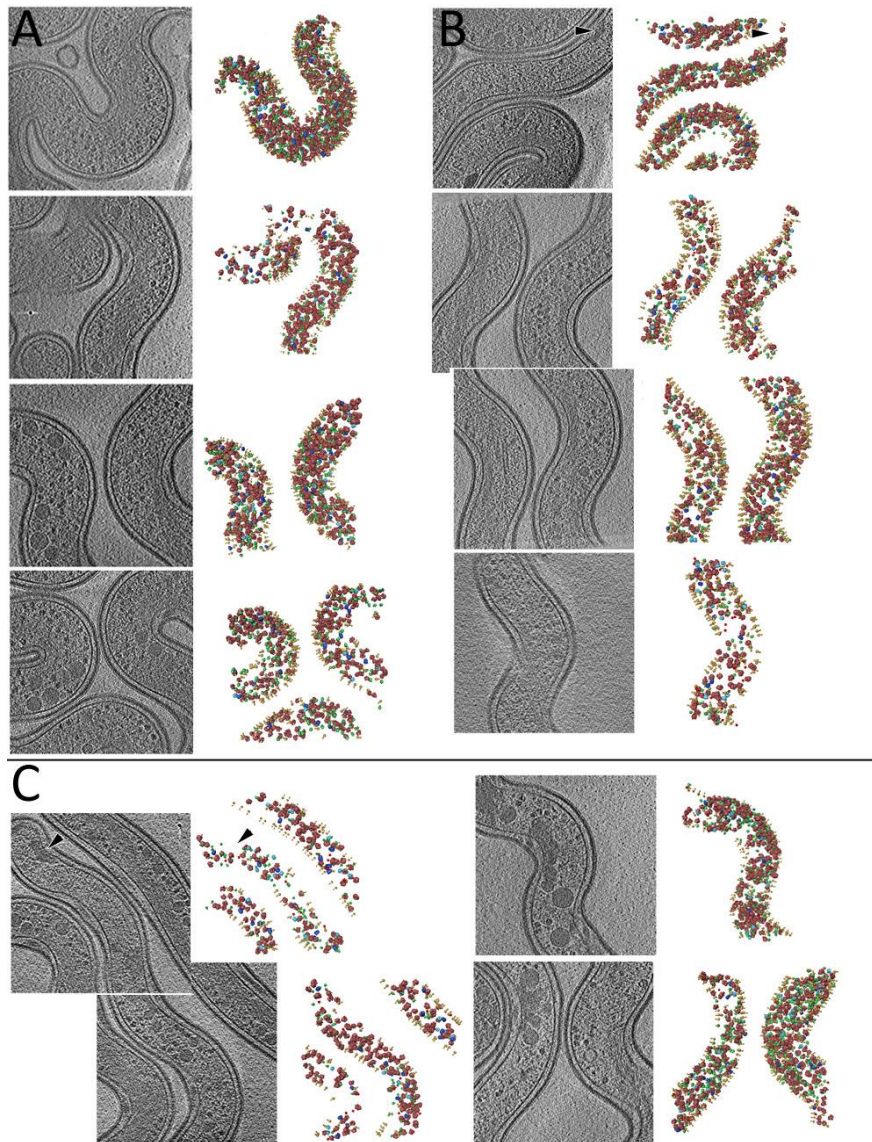

**Supplementary Figure 5.** Template matching in tomograms of *Leptospira interrogans* cells of the non-stimulated (A), heat-shocked (B) and antibiotics-treated condition (C). A slice through the three-dimensional reconstruction is shown at the left, the localization of all detected protein complexes on the right (Color-coding according to Supplementary Figure 1). Large sphere-shape homogeneous densities displace protein complexes. The same is true for flagellar motors apparent in two cells tips (arrowheads).

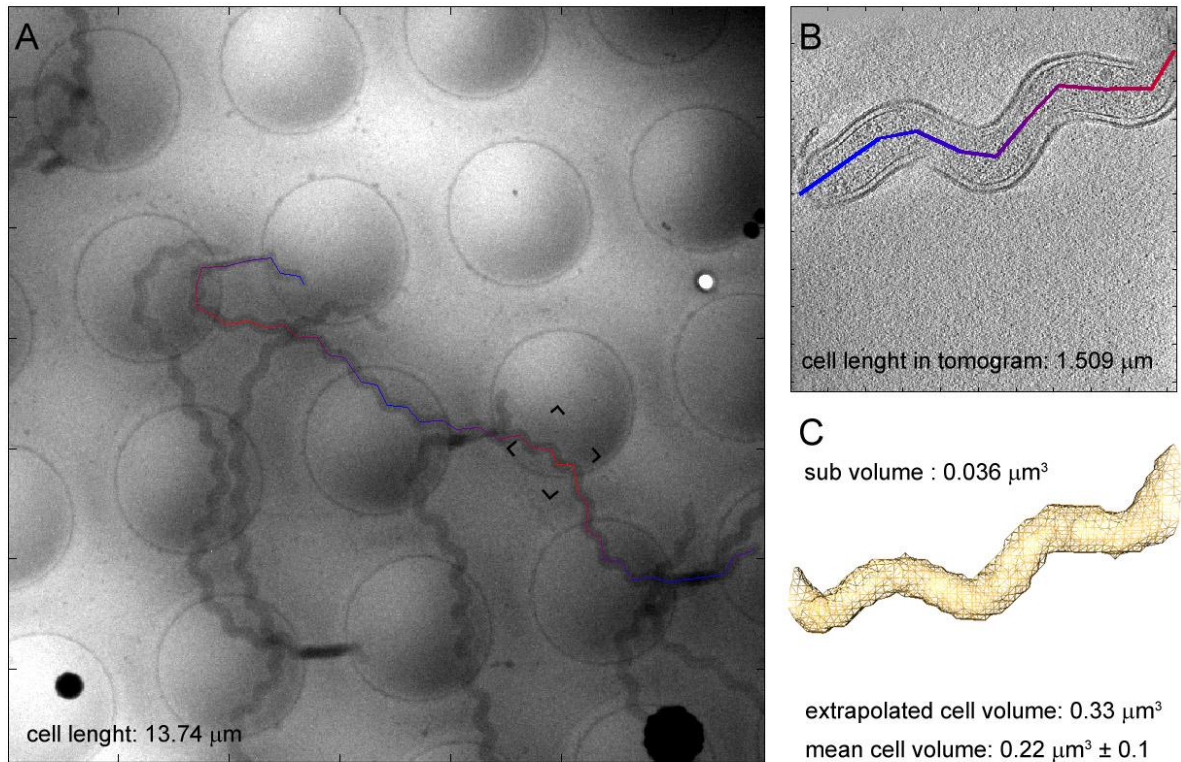

**Supplementary Figure 6.** Volume determination. (A) The cell length was determined from electron micrographs taken at low magnification that contained the entire cell body. *Leptospira* cells had an average cell length of  $11.6 \mu\text{m}$  with a standard deviation of  $3.85 \mu\text{m}$ . (B) The cell length covered by the individual tomograms was determined in the same way (framed in A). (C) The cytoplasmic subvolume covered by the individual tomograms was determined by semi-automatic segmentation in Amira and summing up the relevant voxels. Afterwards the total cell volume was estimated by extrapolation of the cytoplasmic subvolume to the total cell length. The numbers shown are examples for the depicted cell; the average cytoplasmic volume of all cells was  $0.22 \mu\text{m}^3$ .

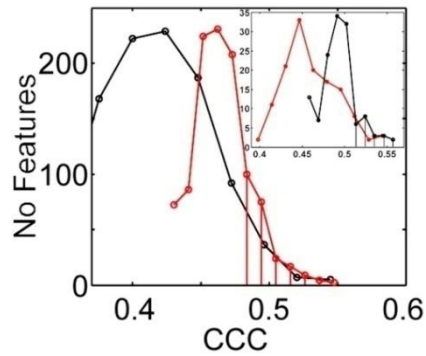

**Supplementary Figure 7.** Distribution of cross correlation coefficients (CCCs) extracted from three tomograms of the antibiotics treated state for Hsp15 (red) and a competing template of similar size (ClpP, black) at the very same coordinates (inset: vice versa). The CCCs were extracted from three tomograms of the antibiotics-treated state that cover ~25% of the average cell volume. The area under the apparent ‘shoulder’ of ~250 features corresponds roughly to the expected abundance of Hsp15 (~300 complexes in the relevant subvolumes). The CCCs of ClpP, a competing template of similar size, that were extracted from the very same coordinates, have a lower intensity (black) and different curve shape indicating noise correlation. Inset: the distribution of the highest CCCs of ClpP has a ‘shoulder’ covering ~25 features (inset, black), while ~35 complexes would be expected in a subvolume of this size. Although Hsp15 is 10-fold more abundant than ClpP under these conditions (Table 1), the CCCs for this competing template extracted from the same coordinates have a lower intensity (red).

## Supplementary Table 1 Structures of protein complex candidates for template matching

| Template                            | Reference     | Oligomeric state        | Molecular Mass [kDa] | Complexes per Cell | Method |
|-------------------------------------|---------------|-------------------------|----------------------|--------------------|--------|
| Ribosome                            | Pdb_2AW7_2AWB | Multicomponent protomer | 2200                 | 4500               | SRM    |
| RNA Polymerase                      | pdb_2GHO      | Multicomponent protomer | 340                  | 3000               | SRM    |
| ATP Synthase                        | pdb_1QO1      | 6mer                    | 450                  | 1500               | SRM    |
| GroEL                               | pdb_1KP8      | 14mer                   | 810                  | 1100               | SRM    |
| GroELS                              | pdb_1aon      | 21mer                   | 870                  |                    |        |
| Hsp15                               | pdb_2BYU      | 12mer                   | 220                  | 40                 | SRM    |
| clpB                                | emd_1243      | 6mer                    | 600                  | 70                 | SRM    |
| clpP                                | pdb_1YG6      | 14mer                   | 304                  | 140                | SRM    |
| HslUV                               | pdb_1G3I      | 24mer                   | 830                  | 20                 | SRM    |
| Transaldolase                       | pdb_1vpx      | 20mer                   | 520                  | 150                | MS1    |
| Bacterioferretin                    | pdb_1BFR      | 24mer                   | 450                  | 4                  | SPC    |
| GTP-Cyclohydrolase                  | pdb_1GTP      | 20mer                   | 500                  | 75                 | MS1    |
| Glutamine Synthase                  | pdb_2gls      | 12mer                   | 620                  | 320                | SPC    |
| Lumazine Synthase                   | pdb_1NQU      | 5mer                    | 420                  | 4                  | SPC    |
| Acetyl-CoA-Carboxylase              | pdb_1vrg      | 6mer                    | 350                  | 40                 | SPC    |
| Acetolactate Synthase               | pdb_1OZF      | 4mer                    | 250                  | 10                 | SPC    |
| Aspartyl-tRNA-Synthase              | pdb_1eqr      | 3mer                    | 200                  | 100                | SPC    |
| Carbamoyl Phosphatase               | pdb_1bxr      | 8mer                    | 650                  | 120                | SPC    |
| Citrate Synthase                    | pdb_2h12      | 6mer                    | 300                  | 220                | MS1    |
| Cytosolic Amino-Peptidase           | pdb_1gyt      | 12mer                   | 660                  | 90                 | MS1    |
| Dihydrolipoamide Acetyl-Transferase | pdb_1dpc      | 24mer                   | 640                  | 30                 | MS1    |
| Enolase                             | pdb_1w6t      | 8mer                    | 390                  | 100                | MS1    |
| LIC11615_UbiD                       | pdb_2idb      | 6mer                    | 350                  | 17                 | SPC    |
| Ornithine Carbamoyltransferase      | pdb_1a1s      | 12mer                   | 420                  | 65                 | MS1    |
| Phosphoribosyl-Pyrophosphatase      | pdb_1dkr      | 6mer                    | 210                  | 55                 | MS1    |
| Aspartate Carbamoyltransferase      | pdb_1f1b      | 12mer                   | 300                  | 10                 | SPC    |

**Supplementary Table 1.** List of protein complexes that were initially candidates for template matching. Please note that only the templates 1-9 are discussed in the main text. The absolute abundance in the cell was measured by SRM or estimated as described<sup>8</sup> based on spectral counts (SPC) or MS1 intensities (MS1).

## Supplementary Table 2 Absolute quantification based on SRM [fmol/ $\mu$ l]

| gi No and description             | peptide sequence       | Control | Heat-   | Antibiotics- | Starved |
|-----------------------------------|------------------------|---------|---------|--------------|---------|
|                                   |                        |         | shocked | treated      |         |
| 45657124 ATP synthase A           | ILEVPVGPPELLGR         | 20.95   | 20.36   | 31.72        | 22.91   |
| 45657124 ATP synthase A           | TSIALDTILNQK           | 27.21   | 28.24   | 38.23        | 24.57   |
| 45657126 ATP synthase B           | FSQAGSEVSALLGR         | 15.40   | 15.09   | 21.49        | 14.16   |
| 45657869 ClpB                     | AVDLIDEASSK            | 1.02    | 1.00    | 1.13         | 0.74    |
| 45657869 ClpB                     | IADIQLEGLR             | 1.66    | 1.60    | 2.54         | 1.19    |
| 45657810 ClpP                     | IAEVFEELTGSK           | 8.07    | 6.66    | 8.95         | 6.03    |
| 45657810 ClpP                     | IFLWGPVTDESSK          | 2.93    | 2.12    | 1.71         | 0.99    |
| 45657810 ClpP                     | LNQILADACGHPISK        | 5.93    | 4.64    | 4.24         | 2.11    |
| 45656498 Fatty acid synthase      | TEVITHANLVR            | 4.37    | 2.90    | 2.41         | 2.08    |
| 45659137 Fatty acid synthase      | AIAEEVPK               | 3.48    | 2.86    | 1.64         | 1.312   |
| 45659137 Fatty acid synthase      | EFFDTSFK               | 6.82    | 5.46    | 3.25         | 2.53    |
| 45657072 flagellar hook protein   | VATAVFNNPAGLDK         | 0.34    | 0.18    | 0.28         | 0.32    |
| 45657269 flagellar M-ring protein | GFTPDGPAGTEPNIAPGYK    | 0.16    | 0.13    | 0.15         | 0.19    |
| 45657269 flagellar M-ring protein | IISDFEEDLEK            | 0.12    | 0.08    | 0.09         | 0.09    |
| 45657753 flagellin protein        | ANLGAYFNR              | 47.25   | 43.70   | 72.95        | 94.99   |
| 45657753 flagellin protein        | VLAIQSSNGIYSAEDR       | 29.68   | 27.26   | 51.44        | 58.82   |
| 45657213 GroEL                    | AVTAAVESIQK            | 48.48   | 56.06   | 50.17        | 40.00   |
| 45657213 GroEL                    | VEDALSATR              | 47.96   | 53.88   | 60.18        | 52.18   |
| 45657214 GroES                    | ESDILAVVK              | 32.85   | 31.99   | 19.50        | 9.75    |
| 45657214 GroES                    | VGDTVLYGK              | 53.05   | 54.33   | 48.87        | 22.88   |
| 45657473 hslU                     | HGSGQITGFATSSTLADEEDRK | 0.77    | 0.57    | 0.47         | 0.34    |
| 45657473 hslU                     | LLEEVSFEGPDLPEQR       | 0.95    | 0.81    | 1.01         | 0.83    |
| 45658059 HSP15-like               | ILELPTEVDSEK           | 0.79    | 7.44    | 26.74        | 0.31    |
| 45658060 HSP15                    | DVQVQLEK               | 0.67    | 7.01    | 15.51        | 0.18    |
| 45657141 MreB                     | GIVLTGGGCLLR           | 11.21   | 11.86   | 16.49        | 12.17   |
| 45657141 MreB                     | TGGDEFDEAIK            | 5.70    | 5.32    | 8.29         | 7.02    |
| 45657611 recombinase A            | IVEIYGPESSGK           | 2.58    | 2.30    | 33.70        | 2.16    |
| 45656646 50s Ribosome L7/12       | LTLVEAADLVK            | 133.05  | 119.43  | 107.56       | 28.39   |
| 45657961 30S Ribosome S6          | EFLINQNILR             | 19.13   | 14.83   | 11.49        | 4.57    |
| 45658686 30S Ribosome S5          | FSFNALSVVGQQR          | 10.14   | 8.51    | 7.22         | 1.80    |
| 45656647 RNA-Polymerase beta      | ITNLDYLPNLIQIQK        | 10.05   | 10.21   | 10.59        | 10.59   |
| 45656647 RNA-Polymerase beta      | TFDLGEVGR              | 9.70    | 9.52    | 10.35        | 10.21   |
| 45656648 RNA-Polymerase beta      | FATSDLNDLYR            | 9.48    | 9.10    | 8.29         | 8.58    |

**Supplementary Table 2.** Absolute quantification based on SRM. The observed values corresponding to the stable isotope labeled reference peptides used are given in [fmol/ $\mu$ l].

### Supplementary Table 3 Relative quantification based on MS1 intensities

| gi No   | Annotation                                                                                                        | C2H  | Std  | NF | C2AB  | Std | NF | C2S   | Std  | NF | H2AB | Std | NF | H2S   | Std | NF | AB2S | Std | NF |
|---------|-------------------------------------------------------------------------------------------------------------------|------|------|----|-------|-----|----|-------|------|----|------|-----|----|-------|-----|----|------|-----|----|
| 4565586 | hypothetical protein LIC20001<br>glutamate-1-semialdehyde<br>aminotransferase                                     | 1.14 | 0.5  | 10 | 1.02  | 0.3 | 10 | 0.81  | 0.6  | 7  | 0.91 | 0.4 | 10 | 0.75  | 0.4 | 8  | 0.82 | 0.5 | 8  |
| 4565594 | response regulator                                                                                                | 0.73 | 0.5  | 5  | 0.47  | 0.2 | 4  | 0.34  | 0.1  | 3  | 0.68 | 0.3 | 5  | 3.09  | 4.5 | 3  | 0.48 | 0.1 | 3  |
| 4565596 | short-chain dehydrogenase                                                                                         | 8.96 | 11.0 | 3  | 10.28 | 9.2 | 2  |       |      |    | 0.79 | 0.0 | 2  |       |     |    |      |     |    |
| 4565609 | NADH dehydrogenase                                                                                                | 1.42 | 0.2  | 2  | 1.49  | 0.3 | 2  | 2.48  | 0.8  | 2  | 3.29 | 4.6 | 4  | 6.17  | 6.4 | 5  | 4.98 | 6.7 | 4  |
| 4565611 | hypothetical protein LIC20030                                                                                     | 1.43 | 0.2  | 10 | 1.49  | 0.4 | 12 | 1.77  | 0.5  | 12 | 0.99 | 0.2 | 10 | 1.34  | 0.2 | 11 | 1.21 | 0.3 | 12 |
| 4565613 | hypothetical protein LIC20032                                                                                     | 1.19 | 0.1  | 2  | 2.57  | 0.7 | 2  | 2.46  | 0.4  | 2  | 2.19 | 0.8 | 2  | 2.09  | 0.5 | 2  | 1.11 | 0.3 | 3  |
| 4565615 | hypothetical protein LIC20035                                                                                     | 0.85 | 0.2  | 2  | 0.57  | 0.1 | 2  | 0.42  | 0.2  | 2  | 0.72 | 0.3 | 2  | 0.54  | 0.3 | 2  | 0.73 | 0.1 | 2  |
| 4565618 | hypothetical protein LIC20036                                                                                     | 0.69 | 0.2  | 11 | 0.87  | 0.1 | 11 | 0.60  | 0.1  | 9  | 1.46 | 0.4 | 11 | 0.90  | 0.3 | 9  | 0.73 | 0.2 | 10 |
| 4565627 | heat shock protein 90                                                                                             | 0.93 | 0.6  | 2  | 0.88  | 0.3 | 2  |       |      |    | 1.06 | 0.4 | 2  |       |     |    |      |     |    |
| 4565641 | methylmalonyl-CoA mutase                                                                                          | 0.98 | 0.2  | 25 | 0.62  | 0.3 | 26 | 0.36  | 0.2  | 20 | 0.66 | 0.3 | 26 | 0.31  | 0.2 | 19 | 0.51 | 0.3 | 20 |
| 4565645 | phosphoribosyl-ATP pyrophosphatase<br>3-oxoacyl-(acyl-carrier protein)<br>reductase                               | 0.88 | 0.3  | 10 | 1.00  | 0.3 | 10 | 0.67  | 0.5  | 11 | 1.19 | 0.3 | 9  | 0.84  | 0.5 | 10 | 0.52 | 0.2 | 10 |
| 4565647 | polysaccharide deacetylase                                                                                        | 0.44 | 0.1  | 4  |       |     |    |       |      |    |      |     |    |       |     |    |      |     |    |
| 4565660 | hypothetical protein LIC20078                                                                                     | 0.79 | 0.1  | 4  | 0.47  | 0.1 | 4  | 0.08  | 0.0  | 4  | 0.53 | 0.2 | 5  | 0.11  | 0.0 | 4  | 0.18 | 0.1 | 4  |
| 4565661 | S-adenosyl-L-homocysteine hydrolase<br>B12-dependent homocysteine-N5-<br>methyltetrahydrofolate<br>transmethylase | 1.39 | 0.8  | 2  | 0.37  | 0.1 | 3  |       |      |    |      |     |    |       |     |    |      |     |    |
| 4565666 | bacterioferritin comigratory protein                                                                              | 0.85 | 0.1  | 12 | 0.58  | 0.3 | 13 | 0.17  | 0.1  | 10 | 0.64 | 0.4 | 14 | 0.14  | 0.1 | 9  | 0.30 | 0.1 | 10 |
| 4565668 | hypothetical protein LIC20096                                                                                     | 0.82 | 0.1  | 13 | 0.46  | 0.1 | 13 | 0.20  | 0.1  | 12 | 0.57 | 0.2 | 14 | 0.20  | 0.1 | 11 | 0.37 | 0.2 | 11 |
| 4565676 | short-chain dehydrogenase                                                                                         | 1.03 | 0.1  | 7  | 0.45  | 0.2 | 6  | 0.30  | 0.1  | 3  | 0.48 | 0.2 | 6  | 0.37  | 0.2 | 3  | 0.60 | 0.4 | 3  |
| 4565679 | phage-related integrase/recombinase                                                                               | 0.58 | 0.0  | 3  | 1.32  | 1.7 | 4  | 0.30  | 0.1  | 2  | 0.85 | 0.7 | 3  | 0.50  | 0.2 | 2  | 0.58 | 0.5 | 2  |
| 4565680 | hypothetical protein LIC20100                                                                                     | 1.53 | 0.4  | 6  | 1.90  | 1.1 | 5  | 5.72  | 4.3  | 6  | 1.14 | 0.5 | 5  | 3.41  | 2.0 | 6  | 3.71 | 0.4 | 4  |
| 4565681 | hypothetical protein LIC20118                                                                                     | 1.14 | 0.2  | 2  | 0.86  | 0.2 | 2  | 0.78  | 0.6  | 2  | 0.80 | 0.4 | 2  | 0.76  | 0.7 | 2  | 0.84 | 0.5 | 2  |
| 4565683 | hypothetical protein LIC20136                                                                                     | 0.65 | 0.1  | 4  | 1.10  | 0.4 | 5  | 0.54  | 0.2  | 4  | 1.54 | 0.4 | 5  | 0.80  | 0.2 | 4  | 0.62 | 0.1 | 5  |
| 4565684 | CheD                                                                                                              | 0.91 | 0.6  | 4  | 1.70  | 0.7 | 4  |       |      |    | 2.10 | 1.0 | 4  |       |     |    |      |     |    |
| 4565700 | hypothetical protein LIC20146                                                                                     | 1.00 | 0.4  | 3  | 2.09  | 0.7 | 3  | 18.11 | 18.0 | 3  | 1.90 | 0.5 | 4  | 14.21 | 9.1 | 4  | 4.79 | 2.2 | 4  |
| 4565718 | capsular polysaccharide biosynthesis<br>protein                                                                   | 0.95 | 0.5  | 2  | 0.90  | 0.1 | 2  | 1.39  | 1.1  | 2  | 3.99 | 2.1 | 3  | 0.90  | 0.1 | 2  | 4.84 | 1.7 | 3  |
| 4565720 | HtrA1                                                                                                             | 0.95 | 0.5  | 2  | 0.90  | 0.1 | 2  |       |      |    | 1.12 | 0.7 | 2  |       |     |    |      |     |    |
| 4565725 | HtrA1-like protein                                                                                                | 0.85 | 0.1  | 4  | 0.66  | 0.3 | 5  | 2.27  | 0.4  | 6  | 0.90 | 0.3 | 6  | 2.74  | 0.7 | 4  | 3.27 | 0.9 | 4  |
| 4565726 | hypothetical protein LIC20153                                                                                     | 1.60 | 1.0  | 5  | 0.83  | 0.6 | 4  | 2.14  | 1.5  | 5  | 0.65 | 0.3 | 4  | 1.59  | 0.4 | 4  | 1.63 | 1.1 | 5  |
| 4565728 | heme oxygenase                                                                                                    | 0.69 | 0.1  | 3  | 0.53  | 0.0 | 3  | 0.28  | 0.1  | 3  | 0.78 | 0.1 | 3  | 0.41  | 0.0 | 3  | 0.53 | 0.1 | 3  |
| 4565730 | hypothetical protein LIC20156                                                                                     | 0.70 | 1.0  | 4  | 0.48  | 0.2 | 4  |       |      |    | 2.73 | 2.1 | 4  |       |     |    |      |     |    |
| 4565735 | lipoprotein                                                                                                       | 0.45 | 0.0  | 2  | 0.25  | 0.1 | 2  |       |      |    | 0.55 | 0.1 | 2  |       |     |    |      |     |    |
| 4565738 | dnaK suppressor                                                                                                   | 1.05 | 0.3  | 4  | 1.91  | 0.5 | 5  |       |      |    | 1.59 | 0.3 | 4  |       |     |    |      |     |    |
| 4565754 | hypothetical protein LIC20185                                                                                     | 0.62 | 0.2  | 6  | 0.07  | 0.0 | 2  |       |      |    | 0.12 | 0.0 | 2  |       |     |    |      |     |    |
| 4565757 | hypothetical protein LIC20196                                                                                     | 1.29 | 0.3  | 8  | 0.49  | 0.4 | 8  | 0.63  | 0.4  | 9  | 0.39 | 0.4 | 8  | 0.50  | 0.3 | 8  | 1.25 | 1.3 | 8  |
| 4565767 | cysteine protease                                                                                                 | 0.61 | 0.1  | 5  | 1.81  | 0.1 | 6  | 0.57  | 0.1  | 5  | 2.41 | 0.4 | 5  | 0.85  | 0.2 | 5  | 0.33 | 0.0 | 5  |
| 4565776 | hypothetical protein LIC20205                                                                                     | 0.63 | 0.3  | 9  | 0.69  | 0.4 | 8  | 0.27  | 0.1  | 2  | 1.09 | 0.7 | 9  | 0.73  | 0.3 | 2  |      |     |    |
| 4565777 | methylmalonyl-CoA mutase small<br>subunit                                                                         | 1.10 | 0.1  | 5  | 0.58  | 0.2 | 4  | 0.53  | 0.3  | 4  | 0.47 | 0.2 | 5  | 2.53  | 4.8 | 7  | 1.15 | 0.6 | 4  |
| 4565785 | methylmalonyl-CoA mutase                                                                                          | 1.07 | 0.2  | 4  | 0.54  | 0.1 | 4  | 0.52  | 0.1  | 4  | 0.49 | 0.1 | 5  | 0.45  | 0.0 | 4  | 1.02 | 0.2 | 5  |
| 4565788 | ExbB                                                                                                              | 0.88 | 0.5  | 4  | 0.95  | 0.4 | 4  | 0.38  | 0.1  | 3  | 1.43 | 1.2 | 4  | 0.59  | 0.5 | 3  | 0.35 | 0.1 | 3  |
| 4565789 | ExbD                                                                                                              | 0.99 | 0.3  | 3  | 1.70  | 0.5 | 3  | 3.30  | 1.3  | 3  | 1.79 | 0.6 | 3  | 3.47  | 1.6 | 3  | 2.17 | 1.2 | 3  |
| 4565796 | acireductone dioxygenase enzyme<br>ARD and ARD'                                                                   | 1.04 | 0.5  | 2  | 1.37  | 0.3 | 2  |       |      |    | 1.54 | 1.0 | 2  |       |     |    |      |     |    |
| 4565797 | S-adenosylmethionine decarboxylase<br>like protein                                                                | 0.37 | 0.1  | 4  | 1.05  | 0.8 | 4  |       |      |    | 3.01 | 2.5 | 4  |       |     |    |      |     |    |
| 4565807 | hypothetical protein LIC20240                                                                                     | 1.01 | 0.9  | 3  | 0.79  | 1.0 | 2  |       |      |    | 0.42 | 0.5 | 2  |       |     |    |      |     |    |
| 4565814 | hypothetical protein LIC20240                                                                                     |      |      |    | 0.88  | 0.1 | 2  |       |      |    |      |     |    |       |     |    |      |     |    |
| 4565816 | aconitate hydratase                                                                                               | 0.77 | 0.2  | 19 | 1.06  | 0.5 | 22 | 0.68  | 0.3  | 20 | 1.40 | 0.6 | 19 | 0.87  | 0.3 | 18 | 0.68 | 0.3 | 20 |
| 4565824 | peptidoglycan-associated cytoplasmic<br>membrane protein                                                          | 1.48 | 0.3  | 4  | 1.67  | 0.2 | 4  | 0.78  | 0.5  | 2  | 1.16 | 0.3 | 4  | 0.50  | 0.1 | 2  | 0.41 | 0.2 | 2  |

|          |                                                                                          |      |     |    |        |       |    |      |     |      |        |       |      |      |     |      |      |     |    |
|----------|------------------------------------------------------------------------------------------|------|-----|----|--------|-------|----|------|-----|------|--------|-------|------|------|-----|------|------|-----|----|
| 45655829 | response regulator aspartate-semialdehyde dehydrogenase                                  |      |     |    |        |       |    |      |     | 1.17 | 0.7    | 2     | 2.61 | 0.6  | 2   | 2.52 | 1.0  | 2   |    |
| 45655841 |                                                                                          | 0.72 | 0.1 | 3  | 0.55   | 0.5   | 2  | 0.24 | 0.0 | 2    | 0.82   | 0.8   | 2    | 0.33 | 0.1 | 2    | 0.76 | 0.7 | 2  |
| 45655849 | ParA                                                                                     | 1.47 | 0.4 | 2  | 1.31   | 0.2   | 2  |      |     |      | 0.91   | 0.1   | 2    |      |     |      |      |     |    |
| 45655850 | ParB                                                                                     | 1.64 | 0.5 | 3  | 1.19   | 1.0   | 3  | 2.01 | 1.9 | 3    | 0.67   | 0.4   | 3    | 1.43 | 1.7 | 3    | 2.43 | 2.8 | 3  |
| 45655916 | DNA polymerase III beta subunit                                                          | 0.71 | 0.3 | 10 | 1.15   | 0.2   | 9  | 0.96 | 0.3 | 10   | 1.36   | 0.5   | 10   | 1.40 | 0.5 | 10   | 0.88 | 0.3 | 10 |
| 45655919 | DNA gyrase subunit B                                                                     | 1.29 | 0.4 | 6  | 0.87   | 0.7   | 6  | 1.08 | 0.5 | 3    | 0.77   | 0.3   | 5    | 0.73 | 0.1 | 3    | 0.78 | 0.2 | 3  |
| 45655920 | DNA gyrase subunit A                                                                     | 1.31 | 0.2 | 15 | 1.06   | 0.2   | 15 | 1.11 | 0.5 | 11   | 0.86   | 0.3   | 15   | 0.90 | 0.4 | 12   | 1.25 | 0.7 | 13 |
| 45655923 | putative lipoprotein                                                                     | 0.98 | 0.2 | 13 | 1.75   | 0.5   | 13 | 1.06 | 0.2 | 11   | 1.90   | 0.3   | 14   | 1.06 | 0.4 | 13   | 0.57 | 0.2 | 12 |
| 45655925 | LipL21                                                                                   | 1.08 | 0.3 | 10 | 1.10   | 0.2   | 10 | 2.32 | 0.6 | 10   | 1.05   | 0.6   | 10   | 2.10 | 0.9 | 10   | 2.14 | 0.5 | 10 |
| 45655931 | hypothetical protein LIC10017 3-oxoacyl-acyl carrier protein reductase                   |      |     |    | 0.37   | 0.1   | 2  |      |     |      |        |       |      |      |     |      |      |     |    |
| 45655933 |                                                                                          | 1.10 | 0.3 | 2  | 0.76   | 0.1   | 2  | 0.38 | 0.3 | 2    | 0.73   | 0.3   | 2    | 0.32 | 0.2 | 2    | 0.52 | 0.4 | 2  |
| 45655942 | putative lipoprotein                                                                     | 0.89 | 0.2 | 3  | 0.87   | 0.1   | 3  | 0.84 | 0.2 | 3    | 0.99   | 0.1   | 3    | 0.96 | 0.2 | 3    | 0.97 | 0.1 | 3  |
| 45655943 | inositol monophosphatase                                                                 | 0.65 | 0.3 | 2  | 0.86   | 0.2   | 2  |      |     |      |        |       |      |      |     |      |      |     |    |
| 45655945 | beta-galactosidase                                                                       | 1.46 | 0.5 | 5  | 1.12   | 0.1   | 4  | 3.09 | 0.8 | 4    | 0.89   | 0.3   | 4    | 3.04 | 1.5 | 5    | 2.72 | 0.6 | 5  |
| 45655951 | GMC oxidoreductase                                                                       |      |     |    | 1.11   | 0.3   | 2  | 1.23 | 0.2 | 2    |        |       |      |      |     |      | 1.17 | 0.5 | 2  |
| 45655957 | Aer                                                                                      | 0.93 | 0.4 | 2  | 0.71   | 0.1   | 2  | 1.03 | 0.2 | 2    | 0.83   | 0.3   | 2    | 1.17 | 0.3 | 2    | 1.44 | 0.1 | 2  |
| 45655959 | dTDP-glucose 4-6-dehydratase proton-translocating transhydrogenase, subunit alpha part 1 | 1.20 | 0.2 | 8  | 0.90   | 0.4   | 7  | 0.57 | 0.2 | 6    | 0.88   | 0.4   | 8    | 0.47 | 0.1 | 6    | 0.66 | 0.1 | 5  |
| 45655960 |                                                                                          | 0.89 | 0.1 | 16 | 1.21   | 0.3   | 17 | 1.64 | 0.5 | 15   | 1.28   | 0.4   | 18   | 1.85 | 0.6 | 16   | 1.43 | 0.5 | 16 |
| 45655968 | putative lipoprotein                                                                     | 0.54 | 0.1 | 5  |        |       |    |      |     |      |        |       |      |      |     |      |      |     |    |
| 45655974 | hypothetical protein LIC10060                                                            | 1.29 | 0.3 | 10 | 1.55   | 0.4   | 10 | 2.43 | 1.0 | 11   | 1.40   | 0.6   | 10   | 1.96 | 0.8 | 11   | 1.85 | 0.9 | 12 |
| 45655977 | histidine kinase sensor protein                                                          | 1.27 | 0.3 | 2  | 0.92   | 0.1   | 2  | 0.42 | 0.1 | 2    | 0.73   | 0.1   | 2    | 0.33 | 0.0 | 2    | 0.46 | 0.0 | 2  |
| 45655978 | hypothetical protein LIC10064 deoxycytidine triphosphate deaminase                       | 0.58 | 0.3 | 5  | 1.07   | 0.3   | 4  | 2.85 | 4.6 | 4    | 2.48   | 1.2   | 4    | 3.58 | 5.5 | 4    | 0.56 | 0.3 | 4  |
| 45655979 |                                                                                          | 0.77 | 0.0 | 2  | 0.93   | 0.1   | 2  |      |     |      | 1.21   | 0.2   | 2    |      |     |      |      |     |    |
| 45655980 | enoyl-Coa hydratase/isomerase family                                                     | 1.15 | 0.5 | 3  | 0.99   | 0.5   | 4  | 1.03 | 0.5 | 2    | 0.83   | 0.6   | 3    | 0.71 | 0.2 | 2    | 1.59 | 0.8 | 2  |
| 45655982 | hypothetical protein LIC10068                                                            | 1.42 | 0.1 | 2  |        |       |    | 1.23 | 1.5 | 2    |        |       |      | 0.90 | 1.1 | 2    |      |     |    |
| 45655988 | diaminopimelate epimerase                                                                | 1.78 | 1.6 | 2  | 1.31   | 0.7   | 2  |      |     |      | 0.97   | 0.5   | 2    |      |     |      |      |     |    |
| 45656005 | long-chain-fatty-acid CoA ligase                                                         | 1.31 | 0.5 | 16 | 1.31   | 0.5   | 16 | 1.22 | 0.7 | 16   | 1.00   | 0.5   | 18   | 0.77 | 0.3 | 17   | 0.97 | 0.8 | 17 |
| 45656025 | hypothetical protein LIC10115                                                            | 1.57 | 0.5 | 8  | 1.73   | 0.5   | 8  | 2.94 | 1.1 | 9    | 1.00   | 0.2   | 8    | 1.58 | 0.5 | 8    | 1.66 | 0.4 | 9  |
| 45656027 | hypothetical protein LIC10117                                                            | 1.13 | 0.5 | 8  | 1.33   | 0.4   | 9  | 3.13 | 0.9 | 8    | 1.25   | 0.6   | 9    | 2.41 | 1.0 | 8    | 2.04 | 0.5 | 10 |
| 45656033 | LipL45-like protein                                                                      | 2.00 | 0.7 | 4  | 1.75   | 0.5   | 4  | 1.21 | 0.5 | 3    | 0.88   | 0.0   | 4    | 0.76 | 0.5 | 3    | 0.85 | 0.5 | 3  |
| 45656034 | hypothetical protein LIC10124                                                            | 1.05 | 0.2 | 4  | 3.28   | 3.2   | 4  | 4.75 | 5.9 | 4    | 1.68   | 0.3   | 4    | 2.04 | 0.5 | 4    | 1.35 | 0.4 | 5  |
| 45656035 | hypothetical protein LIC10125                                                            | 1.09 | 0.3 | 8  | 0.56   | 0.3   | 5  | 2.72 | 3.0 | 6    | 0.84   | 0.3   | 9    | 1.90 | 0.9 | 9    | 2.37 | 1.1 | 11 |
| 45656042 | sigma 54 activator                                                                       | 1.16 | 0.6 | 3  | 0.94   | 0.7   | 2  | 0.53 | 0.1 | 2    | 0.72   | 0.0   | 2    | 0.68 | 0.2 | 2    |      |     |    |
| 45656051 | NADH dehydrogenase I G subunit                                                           | 1.70 | 1.0 | 6  | 1.32   | 0.5   | 5  | 1.03 | 0.5 | 6    | 0.97   | 0.2   | 5    | 0.93 | 0.2 | 5    | 0.86 | 0.4 | 6  |
| 45656063 | hypothetical protein LIC10157                                                            | 1.25 | 0.2 | 10 | 1.29   | 0.5   | 10 | 0.83 | 0.3 | 10   | 1.20   | 0.8   | 11   | 0.76 | 0.5 | 11   | 0.62 | 0.1 | 11 |
| 45656064 | hypothetical protein LIC10158                                                            | 1.93 | 1.9 | 2  | 1.05   | 0.7   | 2  |      |     |      | 0.68   | 0.3   | 2    |      |     |      |      |     |    |
| 45656066 | malic enzyme                                                                             |      |     |    |        |       |    |      |     |      | 0.72   | 0.2   | 2    |      |     |      |      |     |    |
| 45656068 | fumarate hydratase                                                                       | 0.72 | 0.2 | 4  | 0.97   | 0.3   | 4  | 0.63 | 0.1 | 3    | 1.37   | 0.3   | 4    | 0.79 | 0.1 | 3    | 0.59 | 0.1 | 3  |
| 45656072 | hypothetical protein LIC10166                                                            |      |     |    |        |       |    |      |     |      |        |       |      |      |     |      | 0.91 | 1.2 | 3  |
| 45656080 | hypothetical protein LIC10174                                                            |      |     |    | 132.98 | 85.8  | 4  |      |     |      |        |       |      |      |     |      |      |     |    |
| 45656081 | hypothetical protein LIC10175                                                            | 1.08 | 0.2 | 6  | 677.42 | 467.8 | 8  | 2.22 | 1.0 | 7    | 601.17 | 283.0 | 7    | 2.95 | 1.0 | 7    | 0.01 | 0.0 | 17 |
| 45656082 | hypothetical protein LIC10176                                                            | 1.33 | 0.8 | 4  | 634.23 | 254.3 | 4  | 4.49 | 1.8 | 4    | 600.34 | 223.0 | 5    | 3.99 | 1.6 | 4    | 0.01 | 0.0 | 6  |
| 45656083 | hypothetical protein LIC10177                                                            |      |     |    | 276.41 | 281.7 | 3  |      |     |      |        |       |      |      |     |      |      |     |    |
| 45656092 | hypothetical protein LIC10187                                                            |      |     |    | 1.87   | 1.0   | 2  |      |     |      |        |       |      |      |     |      |      |     |    |
| 45656094 | hypothetical protein LIC10189 peptidoglycan associated cytoplasmic membrane protein      |      |     |    |        |       |    |      |     |      |        |       |      |      |     |      | 9.04 | 6.6 | 2  |
| 45656096 |                                                                                          | 0.87 | 0.2 | 15 | 1.06   | 0.2   | 12 | 1.29 | 0.5 | 13   | 1.18   | 0.7   | 16   | 1.50 | 0.6 | 14   | 1.47 | 0.9 | 14 |
| 45656113 | cytochrome c oxidase polypeptide II                                                      | 1.39 | 0.3 | 14 | 1.62   | 0.4   | 12 | 2.21 | 1.0 | 15   | 1.17   | 0.2   | 11   | 1.72 | 0.4 | 15   | 1.45 | 0.5 | 13 |
| 45656114 | cytochrome c oxidase polypeptide I                                                       | 1.37 | 0.3 | 4  | 1.74   | 1.1   | 4  | 3.72 | 1.9 | 4    | 1.21   | 0.4   | 4    | 2.62 | 0.7 | 4    | 2.27 | 0.6 | 4  |
| 45656116 | hypothetical protein LIC10211                                                            |      |     |    |        |       |    |      |     |      | 23.61  | 31.2  | 2    | 2.73 | 2.9 | 2    | 0.27 | 0.2 | 2  |
| 45656119 | transcriptional regulator (CarD family)                                                  | 0.95 | 0.1 | 9  | 0.64   | 0.1   | 10 | 1.00 | 1.8 | 8    | 0.68   | 0.1   | 9    | 0.69 | 0.9 | 8    | 1.62 | 2.1 | 9  |
| 45656120 | hypothetical protein LIC10215                                                            | 1.20 | 0.3 | 6  | 1.47   | 0.5   | 7  | 1.28 | 0.1 | 6    | 1.01   | 0.1   | 6    | 1.02 | 0.1 | 6    | 0.94 | 0.2 | 6  |
| 45656121 | phosphoenolpyruvate carboxykinase                                                        | 0.81 | 0.2 | 34 | 1.04   | 0.4   | 30 | 0.27 | 0.1 | 21   | 1.23   | 0.5   | 30   | 0.30 | 0.1 | 21   | 0.25 | 0.1 | 19 |
| 45656124 | hypothetical protein LIC10219 aspartyl/glutamyl-tRNA amidotransferase subunit B          | 1.21 | 0.2 | 4  | 1.80   | 0.6   | 5  | 3.19 | 0.7 | 4    | 1.29   | 0.3   | 4    | 2.67 | 0.7 | 4    | 1.93 | 0.4 | 4  |
| 45656126 |                                                                                          | 0.78 | 0.4 | 5  | 0.90   | 0.2   | 5  | 0.57 | 0.3 | 4    | 1.01   | 0.3   | 4    | 1.07 | 1.1 | 4    | 0.58 | 0.2 | 4  |
| 45656129 | hypothetical protein LIC10224 RNA polymerase ECF-type sigma factor                       | 1.07 | 0.3 | 3  | 1.50   | 0.5   | 3  | 2.16 | 0.7 | 3    | 1.38   | 0.3   | 3    | 2.02 | 0.4 | 3    | 1.47 | 0.1 | 3  |
| 45656130 |                                                                                          | 1.02 | 0.1 | 2  | 1.08   | 0.1   | 2  | 0.80 | 0.0 | 2    | 1.05   | 0.0   | 2    | 0.78 | 0.1 | 2    | 0.74 | 0.1 | 2  |
| 45656131 | hypothetical protein LIC10226                                                            | 0.58 | 0.2 | 4  | 0.47   | 0.4   | 4  | 0.50 | 0.1 | 2    | 0.82   | 0.8   | 4    | 1.00 | 0.0 | 2    | 1.33 | 1.2 | 2  |
| 45656136 | hypothetical protein LIC10231 lipoprotein releasing system transmembrane protein         | 1.49 | 0.8 | 2  | 1.00   | 0.1   | 2  |      |     |      | 1.28   | 0.9   | 3    |      |     |      |      |     |    |
| 45656137 |                                                                                          | 1.90 | 1.2 | 3  | 2.47   | 1.2   | 3  | 5.14 | 3.9 | 3    | 1.38   | 0.6   | 3    | 3.06 | 2.8 | 3    | 2.36 | 1.1 | 4  |



|          |                                                                                  |      |     |    |       |      |    |       |      |      |       |     |    |      |     |    |       |     |    |
|----------|----------------------------------------------------------------------------------|------|-----|----|-------|------|----|-------|------|------|-------|-----|----|------|-----|----|-------|-----|----|
| 45656138 | ABC transporter ATP-binding protein                                              | 0.96 | 0.2 | 2  | 1.39  | 0.3  | 2  |       |      | 1.44 | 0.1   | 2   |    |      |     |    |       |     |    |
| 45656140 | hypothetical protein LIC10235                                                    | 1.44 | 0.1 | 4  | 0.90  | 0.3  | 4  | 2.17  | 0.4  | 5    | 0.62  | 0.2 | 4  | 1.81 | 0.1 | 4  | 2.76  | 1.2 | 4  |
| 45656142 | cyclic nucleotide binding protein                                                | 0.79 | 0.2 | 4  | 0.89  | 0.4  | 4  | 1.12  | 0.1  | 3    | 0.83  | 0.1 | 4  | 1.16 | 0.2 | 2  | 1.21  | 0.5 | 3  |
| 45656149 | hypothetical protein LIC10244                                                    | 1.40 | 0.9 | 2  |       |      |    | 8.50  | 3.7  | 2    |       |     |    | 6.73 | 1.9 | 2  |       |     |    |
| 45656157 | exonuclease                                                                      |      |     |    | 3.50  | 2.1  | 3  |       |      |      |       |     |    |      |     |    |       |     |    |
| 45656158 | alcohol dehydrogenase                                                            | 0.70 | 0.2 | 4  | 1.11  | 0.2  | 4  | 0.64  | 0.2  | 4    | 1.43  | 0.1 | 4  | 0.89 | 0.4 | 4  | 0.53  | 0.1 | 4  |
| 45656173 | cyclic nucleotide binding protein                                                | 5.98 | 6.6 | 2  | 2.91  | 3.8  | 2  |       |      |      | 0.35  | 0.2 | 2  |      |     |    |       |     |    |
| 45656176 | elongation factor EF-2                                                           | 1.12 | 1.3 | 14 | 1.11  | 0.6  | 14 | 1.03  | 2.0  | 11   | 1.15  | 0.8 | 14 | 0.53 | 0.3 | 11 | 0.98  | 1.4 | 11 |
| 45656186 | zinc-binding dehydrogenase family                                                | 0.87 | 0.2 | 4  | 1.15  | 0.5  | 5  | 1.14  | 0.7  | 5    | 1.32  | 0.9 | 5  | 0.76 | 0.2 | 4  | 0.72  | 0.3 | 4  |
| 45656190 | penicillin G acylase precursor                                                   | 0.88 | 0.1 | 3  | 0.65  | 0.2  | 3  | 3.95  | 2.4  | 3    | 0.73  | 0.1 | 3  | 4.26 | 1.9 | 3  | 5.86  | 2.5 | 3  |
| 45656194 | H+-translocating transhydrogenase subunit beta                                   | 1.38 | 0.2 | 4  | 1.01  | 0.4  | 4  | 0.37  | 0.0  | 4    | 0.72  | 0.3 | 4  | 0.27 | 0.0 | 4  | 0.47  | 0.3 | 4  |
| 45656197 | glycerophosphoryl diester phosphodiesterase                                      | 0.75 | 0.2 | 4  | 1.18  | 0.8  | 4  |       |      |      | 1.04  | 0.3 | 4  |      |     |    |       |     |    |
| 45656205 | putative lipoprotein                                                             | 0.87 | 0.4 | 2  | 1.57  | 0.8  | 2  | 1.25  | 0.0  | 2    | 1.78  | 0.1 | 2  | 1.61 | 0.7 | 2  | 0.92  | 0.5 | 2  |
| 45656213 | glycine dehydrogenase                                                            | 0.91 | 0.2 | 10 | 0.45  | 0.2  | 7  | 0.22  | 0.1  | 6    | 0.54  | 0.2 | 7  | 0.23 | 0.1 | 5  | 0.50  | 0.3 | 5  |
| 45656218 | hypothetical protein LIC10314                                                    | 0.83 | 0.3 | 17 | 1.11  | 0.3  | 13 | 3.07  | 2.2  | 17   | 1.06  | 0.5 | 15 | 3.18 | 1.6 | 17 | 2.62  | 1.1 | 15 |
| 45656221 | ribose 5-phosphate isomerase B                                                   | 0.68 | 0.2 | 3  | 1.07  | 0.2  | 3  | 0.16  | 0.1  | 2    | 1.59  | 0.1 | 3  | 0.20 | 0.1 | 2  | 0.13  | 0.1 | 2  |
| 45656229 | hemolysin                                                                        | 0.74 | 0.2 | 3  | 1.07  | 0.2  | 3  | 0.74  | 0.8  | 2    | 1.57  | 0.7 | 3  | 1.36 | 1.6 | 2  | 0.62  | 0.6 | 2  |
| 45656241 | hypothetical protein LIC10337                                                    | 0.98 | 0.2 | 4  | 1.76  | 0.8  | 3  |       |      |      | 1.87  | 1.3 | 3  |      |     |    |       |     |    |
| 45656243 | hemolysin B                                                                      | 0.92 | 0.2 | 6  | 0.53  | 0.2  | 5  |       |      |      | 0.56  | 0.1 | 5  |      |     |    |       |     |    |
| 45656248 | anti-sigma factor antagonist                                                     | 0.53 | 0.2 | 4  | 0.85  | 0.1  | 3  | 0.34  | 0.1  | 4    | 1.35  | 0.1 | 3  | 0.84 | 0.7 | 4  | 0.38  | 0.1 | 3  |
| 45656252 | hypothetical protein LIC10348                                                    | 0.52 | 0.2 | 5  | 0.28  | 0.1  | 4  |       |      |      | 0.65  | 0.4 | 4  |      |     |    |       |     |    |
| 45656254 | ABC transporter ATP-binding protein electron transfer flavoprotein alpha-subunit |      |     |    |       |      |    |       |      |      |       |     |    |      |     |    | 1.58  | 0.3 | 2  |
| 45656263 | electron transport flavoprotein beta subunit                                     | 0.84 | 0.1 | 12 | 1.20  | 0.4  | 15 | 0.37  | 0.2  | 14   | 1.36  | 0.3 | 14 | 0.43 | 0.2 | 14 | 0.29  | 0.1 | 12 |
| 45656264 | subunit                                                                          | 0.77 | 0.3 | 14 | 1.26  | 0.6  | 16 | 0.13  | 0.0  | 8    | 1.50  | 0.6 | 14 | 0.17 | 0.1 | 8  | 0.11  | 0.0 | 7  |
| 45656266 | isovaleryl-CoA dehydrogenase                                                     | 0.94 | 0.2 | 10 | 1.04  | 0.3  | 10 | 0.57  | 0.2  | 10   | 1.10  | 0.4 | 9  | 0.85 | 1.0 | 10 | 0.62  | 0.2 | 9  |
| 45656280 | hypothetical protein LIC10380                                                    | 1.34 | 0.4 | 8  | 1.24  | 0.6  | 9  | 2.77  | 2.2  | 8    | 0.81  | 0.3 | 8  | 1.69 | 1.1 | 8  | 1.81  | 0.5 | 8  |
| 45656282 | acyl-CoA dehydrogenase                                                           | 0.81 | 0.2 | 4  | 0.67  | 0.3  | 4  |       |      |      | 0.65  | 0.1 | 4  |      |     |    |       |     |    |
| 45656286 | RNA polymerase ECF-type sigma factor                                             | 0.81 | 0.1 | 2  |       |      |    |       |      |      |       |     |    |      |     |    |       |     |    |
| 45656287 | hypothetical protein LIC10387                                                    |      |     |    |       |      |    |       |      |      | 0.71  | 0.6 | 2  | 2.82 | 0.8 | 2  | 5.35  | 3.3 | 2  |
| 45656296 | acetyl-CoA acetyltransferase                                                     | 0.79 | 0.2 | 11 | 0.95  | 0.2  | 11 | 0.33  | 0.1  | 11   | 1.17  | 0.1 | 10 | 0.44 | 0.2 | 11 | 0.42  | 0.2 | 11 |
| 45656303 | riboflavin synthase beta chain                                                   | 1.45 | 0.1 | 3  | 1.64  | 0.1  | 3  | 2.22  | 1.0  | 3    | 1.14  | 0.1 | 3  | 1.59 | 0.9 | 3  | 1.36  | 0.6 | 3  |
| 45656305 | hypothetical protein LIC10405                                                    | 1.39 | 1.2 | 2  |       |      |    | 2.58  | 2.7  | 2    | 1.24  | 0.9 | 2  | 1.47 | 0.5 | 3  | 1.93  | 1.9 | 2  |
| 45656309 | 2-isopropylmalate synthase                                                       |      |     |    | 17.06 | 22.6 | 2  |       |      |      | 23.36 | 7.6 | 2  |      |     |    | 0.80  | 0.1 | 3  |
| 45656311 | hypothetical protein LIC10411                                                    | 3.09 | 4.0 | 4  | 6.24  | 11.7 | 4  | 15.33 | 29.3 | 4    | 0.91  | 1.2 | 4  | 2.09 | 3.0 | 4  | 1.88  | 1.1 | 4  |
| 45656315 | hypothetical protein LIC10415                                                    | 0.60 | 0.2 | 3  | 0.54  | 0.2  | 3  | 0.44  | 0.3  | 3    | 1.00  | 0.7 | 3  | 0.88 | 0.6 | 3  | 1.10  | 1.1 | 3  |
| 45656325 | hypothetical protein LIC10425                                                    | 0.90 | 0.5 | 2  | 0.53  | 0.1  | 2  |       |      |      | 0.64  | 0.2 | 2  |      |     |    |       |     |    |
| 45656327 | UDP-N-acetylglucosamine pyrophosphorylase                                        | 0.93 | 0.3 | 7  | 0.99  | 0.1  | 4  | 0.23  | 0.2  | 4    | 0.94  | 0.1 | 4  | 0.26 | 0.2 | 4  | 0.25  | 0.2 | 3  |
| 45656328 | phosphoribosyl pyrophosphate synthetase                                          | 1.07 | 0.2 | 2  | 8.76  | 10.5 | 2  | 1.62  | 1.5  | 2    | 7.41  | 8.4 | 2  | 1.41 | 1.2 | 2  | 0.29  | 0.2 | 2  |
| 45656329 | 50S ribosomal protein L25                                                        | 0.98 | 0.1 | 7  | 0.69  | 0.2  | 7  | 0.36  | 0.1  | 7    | 0.77  | 0.1 | 6  | 0.34 | 0.1 | 6  | 0.55  | 0.1 | 7  |
| 45656330 | peptidyl-tRNA hydrolase                                                          | 1.40 | 0.9 | 4  | 1.04  | 0.5  | 2  |       |      |      | 0.93  | 0.6 | 2  |      |     |    |       |     |    |
| 45656331 | cell division protein                                                            | 1.14 | 0.1 | 14 | 0.64  | 0.2  | 14 | 0.38  | 0.1  | 11   | 0.56  | 0.1 | 14 | 0.33 | 0.1 | 12 | 0.54  | 0.2 | 12 |
| 45656338 | hypothetical protein LIC10439                                                    | 0.89 | 0.3 | 2  | 1.54  | 0.2  | 2  | 0.27  | 0.1  | 2    | 1.84  | 0.8 | 2  | 0.34 | 0.2 | 2  | 0.17  | 0.1 | 2  |
| 45656339 | nitrogen regulatory protein pII                                                  | 0.84 | 0.1 | 2  | 0.38  | 0.2  | 2  |       |      |      | 0.47  | 0.2 | 2  |      |     |    |       |     |    |
| 45656343 | glucose-1-phosphate thymidyltransferase                                          |      |     |    |       |      |    |       |      |      | 0.66  | 0.2 | 2  |      |     |    |       |     |    |
| 45656344 | glutamine-fructose-6-phosphate transaminase                                      | 1.01 | 0.2 | 11 | 0.90  | 0.2  | 11 | 0.84  | 0.3  | 10   | 0.91  | 0.2 | 11 | 0.73 | 0.3 | 11 | 0.80  | 0.3 | 11 |
| 45656345 | phosphomannomutase                                                               | 1.62 | 0.9 | 5  | 0.78  | 0.3  | 3  | 0.59  | 0.1  | 2    | 0.35  | 0.1 | 2  |      |     |    | 0.83  | 0.5 | 2  |
| 45656350 | glycosyltransferase                                                              | 1.29 | 0.3 | 14 | 1.54  | 0.2  | 14 | 3.04  | 0.7  | 13   | 1.25  | 0.3 | 15 | 2.50 | 1.0 | 15 | 1.86  | 0.9 | 16 |
| 45656362 | Ig-like repeat domain protein 3                                                  |      |     |    |       |      |    |       |      |      |       |     |    |      |     |    | 10.37 | 2.0 | 2  |
| 45656380 | hypothetical protein LIC10482                                                    | 0.85 | 0.3 | 4  | 0.45  | 0.1  | 4  | 2.06  | 1.6  | 4    | 0.61  | 0.2 | 5  | 1.84 | 1.1 | 4  | 3.17  | 1.8 | 4  |
| 45656381 | hypothetical protein LIC10483                                                    | 0.91 | 0.3 | 13 | 1.06  | 0.4  | 13 | 1.69  | 0.5  | 11   | 1.14  | 0.3 | 13 | 1.88 | 0.4 | 11 | 1.73  | 0.3 | 11 |
| 45656382 | threonine synthase                                                               | 0.97 | 0.2 | 12 | 0.84  | 0.2  | 12 | 0.37  | 0.1  | 9    | 0.87  | 0.1 | 12 | 0.35 | 0.1 | 9  | 0.40  | 0.1 | 9  |
| 45656384 | hypothetical protein LIC10486                                                    | 1.20 | 0.4 | 5  | 1.15  | 0.4  | 5  | 1.12  | 0.2  | 5    | 1.06  | 0.3 | 5  | 1.01 | 0.3 | 4  | 0.77  | 0.2 | 4  |
| 45656405 | putative lipoprotein                                                             | 1.08 | 0.3 | 4  | 1.11  | 0.5  | 4  | 0.25  | 0.1  | 2    | 1.01  | 0.4 | 4  | 0.20 | 0.1 | 2  | 0.16  | 0.0 | 2  |
| 45656410 | hypothetical protein LIC10512                                                    | 0.35 | 0.0 | 3  | 0.49  | 0.3  | 3  |       |      |      | 1.36  | 0.6 | 3  |      |     |    |       |     |    |
| 45656415 | leucyl-tRNA synthetase                                                           | 2.13 | 1.9 | 2  | 0.85  | 0.5  | 2  |       |      |      | 0.49  | 0.2 | 2  |      |     |    |       |     |    |
| 45656416 | ABC transporter, atp-binding protein                                             | 1.03 | 0.3 | 2  | 0.99  | 0.1  | 2  |       |      |      | 1.00  | 0.3 | 2  |      |     |    |       |     |    |
| 45656420 | oxidoreductase family                                                            | 1.10 | 0.2 | 5  | 0.98  | 0.3  | 6  | 0.95  | 0.2  | 6    | 0.95  | 0.5 | 6  | 1.00 | 0.4 | 6  | 0.99  | 0.2 | 6  |
| 45656421 | DnaJ                                                                             | 1.74 | 0.7 | 6  | 1.04  | 0.4  | 6  | 0.63  | 0.3  | 4    | 0.62  | 0.1 | 6  | 0.38 | 0.1 | 5  | 0.55  | 0.1 | 5  |
| 45656422 | DnaK                                                                             | 1.54 | 0.3 | 50 | 2.93  | 0.8  | 50 | 0.49  | 0.2  | 39   | 1.93  | 0.4 | 49 | 0.33 | 0.1 | 38 | 0.17  | 0.0 | 37 |
| 45656423 | GrpE                                                                             | 1.05 | 0.0 | 2  | 1.32  | 0.4  | 2  |       |      |      | 1.23  | 0.2 | 4  | 0.56 | 0.2 | 3  | 0.45  | 0.2 | 3  |

|          |                                                                      |      |     |    |      |     |    |       |      |    |      |     |    |       |     |    |       |      |    |
|----------|----------------------------------------------------------------------|------|-----|----|------|-----|----|-------|------|----|------|-----|----|-------|-----|----|-------|------|----|
| 45656424 | heat-inducible transcriptional repressor                             |      |     |    |      |     |    |       |      |    | 1.12 | 0.4 | 2  | 7.37  | 1.1 | 2  | 7.24  | 3.6  | 2  |
| 45656436 | ABC transporter ATP-binding protein                                  | 1.01 | 0.1 | 3  | 2.42 | 1.7 | 3  | 0.52  | 0.3  | 2  | 2.40 | 1.7 | 3  | 0.53  | 0.4 | 2  | 0.38  | 0.3  | 2  |
| 45656444 | lipase                                                               | 1.07 | 0.1 | 2  | 1.13 | 0.6 | 2  | 2.02  | 1.5  | 2  | 1.03 | 0.4 | 2  | 1.98  | 1.6 | 2  | 2.49  | 2.6  | 2  |
| 45656445 | putative lipoprotein                                                 | 1.57 | 1.0 | 2  | 0.81 | 0.6 | 2  | 20.53 | 24.0 | 2  | 0.83 | 1.0 | 2  | 10.31 | 8.6 | 2  | 54.60 | 73.2 | 2  |
| 45656448 | anti-sigma factor antagonist                                         | 0.93 | 0.2 | 4  | 0.76 | 0.1 | 4  | 0.95  | 0.7  | 4  | 0.80 | 0.3 | 5  | 1.13  | 1.0 | 4  | 1.15  | 0.9  | 4  |
| 45656449 | hypothetical protein LIC10551                                        | 1.25 | 0.4 | 12 | 1.38 | 0.4 | 12 | 1.62  | 0.4  | 11 | 1.01 | 0.3 | 12 | 1.19  | 0.6 | 11 | 1.19  | 0.3  | 11 |
| 45656452 | hypothetical protein LIC10554                                        | 0.91 | 0.3 | 2  | 0.91 | 0.1 | 2  | 1.67  | 1.2  | 2  | 1.03 | 0.2 | 2  | 1.72  | 0.8 | 2  | 1.77  | 1.1  | 2  |
| 45656455 | response regulator                                                   | 0.74 | 0.2 | 3  | 0.87 | 0.2 | 3  | 0.66  | 0.0  | 3  | 1.20 | 0.2 | 3  | 0.94  | 0.3 | 3  | 0.77  | 0.1  | 3  |
| 45656456 | hypothetical protein LIC10558                                        | 0.96 | 0.2 | 2  | 2.82 | 3.8 | 3  | 12.15 | 18.2 | 3  | 0.65 | 0.0 | 2  | 1.77  | 0.2 | 2  | 3.33  | 1.1  | 3  |
| 45656463 | enoyl-CoA hydratase                                                  | 0.76 | 0.2 | 2  | 0.53 | 0.4 | 2  | 0.45  | 0.2  | 2  | 0.65 | 0.4 | 2  | 0.68  | 0.5 | 2  | 1.50  | 1.6  | 2  |
| 45656469 | homoserine dehydrogenase                                             | 0.58 | 0.3 | 2  | 1.32 | 0.8 | 2  | 2.23  | 0.2  | 2  | 2.22 | 0.1 | 2  | 4.64  | 3.0 | 2  | 2.13  | 1.5  | 2  |
| 45656476 | hypothetical protein LIC10578                                        | 1.06 | 0.5 | 7  | 0.55 | 0.3 | 6  | 0.84  | 0.2  | 5  | 0.63 | 0.3 | 6  | 1.03  | 0.5 | 5  | 1.41  | 0.3  | 5  |
| 45656480 | anthranilate synthase component I                                    | 0.83 | 0.3 | 2  | 0.83 | 0.0 | 2  |       |      |    | 1.06 | 0.4 | 2  |       |     |    |       |      |    |
| 45656481 | acyl-CoA dehydrogenase                                               | 0.79 | 0.0 | 4  | 0.74 | 0.3 | 6  | 0.39  | 0.1  | 5  | 0.89 | 0.4 | 5  | 0.46  | 0.2 | 5  | 0.61  | 0.3  | 5  |
| 45656497 | hypothetical protein LIC10599                                        |      |     |    |      |     |    |       |      |    |      |     |    |       |     |    | 7.62  | 0.6  | 2  |
| 45656498 | fatty acid synthase subunit beta                                     | 1.00 | 0.6 | 4  | 1.55 | 1.3 | 4  | 0.66  | 0.2  | 3  | 1.43 | 0.3 | 4  | 0.93  | 0.2 | 3  | 0.72  | 0.1  | 3  |
| 45656499 | hypothetical protein LIC10601                                        | 0.76 | 0.2 | 5  | 0.81 | 0.2 | 5  | 0.78  | 0.2  | 4  | 1.25 | 0.2 | 4  | 1.09  | 0.2 | 4  | 0.87  | 0.1  | 4  |
| 45656504 | DNA-binding stress protein                                           | 1.00 | 0.1 | 8  | 0.67 | 0.4 | 8  | 3.10  | 0.4  | 8  | 0.72 | 0.4 | 8  | 3.32  | 0.5 | 8  | 5.78  | 4.7  | 9  |
| 45656505 | aminotransferase                                                     | 0.86 | 0.3 | 11 | 0.85 | 0.3 | 10 | 0.63  | 0.4  | 9  | 1.14 | 0.5 | 11 | 0.78  | 0.5 | 9  | 0.79  | 0.4  | 9  |
| 45656506 | ATP-dependent protease La                                            | 2.11 | 0.9 | 4  | 1.81 | 0.1 | 5  | 4.62  | 3.0  | 6  | 0.76 | 0.4 | 5  | 1.27  | 0.3 | 5  | 2.09  | 1.2  | 5  |
| 45656520 | motility protein A                                                   | 1.24 | 0.1 | 3  | 0.92 | 0.1 | 3  | 1.60  | 0.3  | 3  | 0.74 | 0.1 | 3  | 1.29  | 0.2 | 3  | 1.70  | 0.6  | 4  |
| 45656521 | flagellar motor protein                                              | 1.05 | 0.6 | 3  | 1.43 | 1.3 | 3  | 1.28  | 1.4  | 3  | 1.22 | 0.3 | 4  | 1.02  | 0.5 | 4  | 0.81  | 0.2  | 4  |
| 45656522 | flagellar protein                                                    | 1.05 | 0.4 | 6  | 0.83 | 0.3 | 5  | 2.18  | 0.4  | 5  | 0.79 | 0.2 | 6  | 2.29  | 1.0 | 6  | 2.50  | 0.5  | 6  |
| 45656526 | putative lipoprotein                                                 |      |     |    |      |     |    |       |      |    |      |     |    |       |     |    | 3.78  | 2.7  | 2  |
| 45656553 | hypothetical protein LIC10655                                        | 0.37 | 0.1 | 2  | 0.56 | 0.1 | 2  | 0.80  | 0.9  | 2  |      |     |    |       |     |    |       |      |    |
| 45656560 | hypothetical protein LIC10662                                        | 0.28 | 0.1 | 2  | 1.18 | 1.1 | 2  | 0.75  | 0.6  | 2  | 3.64 | 2.3 | 2  | 2.42  | 1.1 | 2  | 0.71  | 0.2  | 2  |
| 45656562 | hypothetical protein LIC10664                                        | 0.72 | 0.3 | 3  | 0.64 | 0.1 | 3  | 0.32  | 0.1  | 3  | 0.95 | 0.3 | 3  | 0.47  | 0.1 | 3  | 0.50  | 0.0  | 3  |
| 45656570 | hypothetical protein LIC10672                                        | 1.18 | 0.1 | 6  | 0.66 | 0.1 | 5  | 1.49  | 0.2  | 6  | 0.50 | 0.1 | 6  | 1.25  | 0.3 | 7  | 2.65  | 0.3  | 6  |
| 45656579 | phosphoribosylformylglycinamide synthase                             | 1.25 | 0.6 | 4  | 1.46 | 1.1 | 4  | 3.58  | 4.4  | 3  | 1.83 | 1.8 | 4  | 2.21  | 2.4 | 3  | 1.07  | 0.3  | 3  |
| 45656588 | hypothetical protein LIC10690                                        | 1.45 | 0.3 | 8  | 1.15 | 0.4 | 8  | 1.12  | 0.6  | 8  | 0.75 | 0.2 | 8  | 0.75  | 0.3 | 8  | 0.96  | 0.4  | 8  |
| 45656598 | 3-oxoacyl-[acyl-carrier-protein] reductase oxidoreductase            | 0.75 | 0.1 | 16 | 0.67 | 0.2 | 17 | 0.26  | 0.1  | 14 | 0.90 | 0.2 | 16 | 0.34  | 0.1 | 15 | 0.34  | 0.1  | 15 |
| 45656603 | hypothetical protein LIC10705                                        |      |     |    | 0.49 | 0.1 | 2  |       |      |    |      |     |    |       |     |    |       |      |    |
| 45656610 | hypothetical protein LIC10712                                        | 0.16 | 0.0 | 2  | 0.37 | 0.1 | 3  |       |      |    | 2.60 | 0.4 | 2  |       |     |    |       |      |    |
| 45656612 | outer membrane receptor protein                                      | 1.31 | 0.5 | 11 | 0.65 | 0.3 | 11 | 1.32  | 0.8  | 9  | 0.54 | 0.2 | 10 | 1.12  | 0.5 | 10 | 2.02  | 0.9  | 10 |
| 45656617 | polyphosphate kinase                                                 | 0.94 | 0.1 | 4  | 0.75 | 0.3 | 5  | 0.64  | 0.3  | 5  | 0.75 | 0.3 | 5  | 0.71  | 0.1 | 4  | 0.84  | 0.3  | 5  |
| 45656628 | bacterioferritin comigratory protein                                 | 0.91 | 0.2 | 3  | 1.03 | 0.4 | 3  |       |      |    | 0.81 | 0.5 | 5  |       |     |    |       |      |    |
| 45656629 | cytosol aminopeptidase protein                                       | 1.42 | 0.3 | 9  | 1.38 | 0.2 | 8  | 3.35  | 0.7  | 10 | 0.86 | 0.2 | 9  | 2.35  | 0.5 | 8  | 2.49  | 0.5  | 11 |
| 45656634 | ATP-dependent RNA helicase                                           | 1.25 | 1.6 | 2  |      |     |    |       |      |    | 0.64 | 0.1 | 2  |       |     |    |       |      |    |
| 45656642 | transcription antitermination protein                                | 0.75 | 0.1 | 5  | 0.95 | 0.2 | 6  | 0.09  | 0.1  | 3  | 1.28 | 0.4 | 5  | 0.12  | 0.1 | 3  | 0.10  | 0.1  | 3  |
| 45656643 | 50S ribosomal protein L11                                            | 0.81 | 0.2 | 9  | 0.73 | 0.3 | 9  | 0.24  | 0.1  | 5  | 0.78 | 0.1 | 10 | 0.33  | 0.2 | 6  | 0.28  | 0.2  | 5  |
| 45656644 | 50S ribosomal protein L1                                             | 1.10 | 0.2 | 8  | 0.66 | 0.5 | 9  | 0.33  | 0.3  | 7  | 0.59 | 0.2 | 8  | 0.32  | 0.3 | 7  | 0.78  | 0.7  | 7  |
| 45656645 | 50S ribosomal protein L10                                            | 0.89 | 0.2 | 4  | 1.09 | 1.5 | 5  | 0.90  | 1.2  | 2  | 0.49 | 0.2 | 4  |       |     |    | 7.84  | 10.4 | 4  |
| 45656646 | 50S ribosomal protein L7/L12                                         | 0.48 | 0.1 | 8  | 0.10 | 0.0 | 7  | 0.01  | 0.0  | 5  | 0.23 | 0.1 | 8  | 0.02  | 0.0 | 4  | 0.10  | 0.0  | 4  |
| 45656647 | DNA-directed RNA polymerase beta subunit                             | 1.14 | 0.2 | 47 | 0.83 | 0.3 | 47 | 1.16  | 0.4  | 44 | 0.80 | 0.3 | 50 | 1.04  | 0.5 | 45 | 1.38  | 0.5  | 44 |
| 45656648 | DNA-directed RNA polymerase beta' subunit                            | 1.18 | 0.3 | 66 | 0.80 | 0.2 | 64 | 1.37  | 0.4  | 64 | 0.70 | 0.2 | 71 | 1.21  | 0.5 | 69 | 1.69  | 0.5  | 66 |
| 45656649 | 30S ribosomal protein S12                                            | 1.10 | 0.0 | 3  | 0.56 | 0.2 | 3  | 0.31  | 0.2  | 3  | 0.77 | 0.5 | 4  | 0.51  | 0.5 | 4  | 0.61  | 0.2  | 4  |
| 45656650 | 30S ribosomal protein S7                                             | 0.93 | 0.1 | 11 | 0.27 | 0.0 | 12 | 0.31  | 0.1  | 11 | 0.28 | 0.1 | 13 | 0.33  | 0.1 | 11 | 1.06  | 0.4  | 10 |
| 45656654 | hypothetical protein LIC10760                                        | 0.61 | 0.2 | 4  | 1.10 | 0.4 | 3  | 1.37  | 1.3  | 3  | 2.12 | 0.4 | 3  | 1.90  | 1.1 | 3  | 0.60  | 0.2  | 2  |
| 45656655 | 50S ribosomal protein L13                                            | 0.97 | 0.1 | 7  | 0.51 | 0.2 | 7  | 0.05  | 0.0  | 2  | 0.47 | 0.2 | 6  | 0.05  | 0.0 | 2  | 0.09  | 0.0  | 2  |
| 45656656 | 30S ribosomal protein S9                                             | 0.93 | 0.0 | 2  | 0.34 | 0.0 | 2  |       |      |    | 0.36 | 0.0 | 2  |       |     |    |       |      |    |
| 45656657 | alanyl-tRNA synthetase                                               | 1.00 | 0.3 | 6  | 1.28 | 0.4 | 6  | 0.53  | 0.2  | 3  | 1.16 | 0.2 | 7  | 0.59  | 0.2 | 4  | 0.50  | 0.2  | 4  |
| 45656658 | hypothetical protein LIC10764                                        | 0.60 | 0.2 | 3  | 0.97 | 0.1 | 2  | 0.11  | 0.0  | 2  | 1.39 | 0.0 | 2  | 0.16  | 0.0 | 2  | 0.12  | 0.0  | 2  |
| 45656659 | hypothetical protein LIC10765                                        | 0.88 | 0.6 | 2  |      |     |    |       |      |    |      |     |    |       |     |    |       |      |    |
| 45656662 | metalloprotease                                                      | 0.69 | 0.1 | 2  | 0.95 | 0.1 | 3  | 0.61  | 0.1  | 2  | 1.37 | 0.3 | 2  |       |     |    | 0.66  | 0.0  | 2  |
| 45656663 | processing metalloprotease                                           | 0.96 | 0.5 | 4  | 0.99 | 0.1 | 3  | 0.59  | 0.2  | 5  | 1.78 | 1.3 | 3  | 0.96  | 0.7 | 4  | 0.64  | 0.2  | 3  |
| 45656666 | hypothetical protein LIC10772                                        | 0.83 | 0.1 | 5  | 0.36 | 0.1 | 4  | 0.34  | 0.1  | 3  | 0.45 | 0.1 | 4  | 0.76  | 0.6 | 3  | 1.15  | 0.4  | 3  |
| 45656680 | flagellar filament sheath protein                                    | 1.25 | 0.4 | 13 | 0.90 | 0.2 | 12 | 1.83  | 0.8  | 12 | 0.69 | 0.2 | 13 | 1.37  | 0.8 | 13 | 2.30  | 0.8  | 12 |
| 45656681 | flagellar filament sheath protein transcript cleavage factor/unknown | 1.31 | 0.5 | 18 | 1.02 | 0.6 | 16 | 2.89  | 1.9  | 18 | 0.88 | 0.3 | 16 | 2.05  | 0.6 | 16 | 2.24  | 1.2  | 19 |
| 45656682 | domain fusion protein                                                | 1.09 | 0.2 | 31 | 0.83 | 0.3 | 33 | 0.41  | 0.2  | 26 | 0.74 | 0.2 | 35 | 0.39  | 0.2 | 29 | 0.50  | 0.2  | 29 |
| 45656686 | surface antigen                                                      | 2.15 | 2.8 | 3  | 0.21 | 0.0 | 2  | 1.35  | 1.3  | 2  | 0.70 | 0.5 | 3  | 0.63  | 0.3 | 2  |       |      |    |
| 45656729 | glyoxalase                                                           | 0.84 | 0.3 | 4  | 0.36 | 0.1 | 3  | 0.66  | 0.4  | 4  | 0.40 | 0.2 | 3  | 0.63  | 0.5 | 4  | 2.54  | 1.7  | 3  |

|          |                                                                                              |      |     |    |      |     |    |      |     |    |      |     |    |      |     |    |      |     |    |
|----------|----------------------------------------------------------------------------------------------|------|-----|----|------|-----|----|------|-----|----|------|-----|----|------|-----|----|------|-----|----|
| 45656733 | dihydrodipicolinate synthase                                                                 | 0.79 | 0.1 | 5  | 1.54 | 0.4 | 5  | 1.01 | 0.3 | 6  | 1.72 | 0.2 | 5  | 1.03 | 0.1 | 5  | 0.70 | 0.2 | 5  |
| 45656738 | hypothetical protein LIC10847                                                                | 0.39 | 0.2 | 2  |      |     |    |      |     |    |      |     |    |      |     |    |      |     |    |
| 45656739 | hypothetical protein LIC10848                                                                | 1.06 | 0.4 | 3  | 1.55 | 0.5 | 3  |      |     |    | 1.46 | 0.0 | 3  |      |     |    |      |     |    |
| 45656741 | 30S ribosomal protein S2                                                                     | 0.80 | 0.1 | 6  | 0.57 | 0.1 | 7  | 0.32 | 0.0 | 4  | 0.64 | 0.2 | 5  | 0.39 | 0.1 | 4  | 0.63 | 0.1 | 4  |
| 45656742 | elongation factor Ts                                                                         | 0.63 | 0.1 | 7  | 0.77 | 0.0 | 5  | 0.17 | 0.0 | 7  | 1.16 | 0.2 | 6  | 0.29 | 0.1 | 7  | 0.20 | 0.1 | 5  |
| 45656743 | uridylate kinase                                                                             | 1.13 | 0.6 | 6  | 0.70 | 0.3 | 5  | 2.95 | 4.7 | 3  | 0.65 | 0.1 | 5  | 1.43 | 1.9 | 3  | 1.81 | 2.7 | 3  |
| 45656744 | ribosome recycling factor                                                                    | 0.76 | 0.1 | 3  |      |     |    | 0.23 | 0.1 | 2  |      |     |    | 0.31 | 0.1 | 2  |      |     |    |
| 45656748 | integral membrane zinc metalloprotease                                                       | 1.56 | 0.2 | 10 | 1.48 | 0.6 | 12 | 6.23 | 4.5 | 12 | 0.90 | 0.3 | 11 | 3.46 | 2.8 | 11 | 4.05 | 3.7 | 12 |
| 45656749 | prolyl-tRNA synthetase                                                                       | 1.25 | 0.4 | 5  | 0.74 | 0.1 | 4  | 0.63 | 0.1 | 4  | 0.53 | 0.1 | 4  | 0.49 | 0.2 | 4  | 0.85 | 0.1 | 4  |
| 45656750 | tryptophan synthase subunit beta                                                             | 1.39 | 0.3 | 4  | 1.36 | 0.7 | 5  | 2.56 | 1.9 | 4  | 0.88 | 0.5 | 4  | 1.88 | 1.5 | 4  | 2.23 | 2.2 | 4  |
| 45656753 | adenylate/guanylate cyclase                                                                  | 1.34 | 0.3 | 16 | 1.35 | 0.5 | 19 | 2.79 | 1.7 | 19 | 1.02 | 0.2 | 17 | 2.01 | 0.7 | 18 | 2.18 | 0.9 | 17 |
| 45656764 | hypothetical protein LIC10873                                                                | 0.97 | 0.2 | 5  | 1.52 | 0.3 | 6  | 2.33 | 0.4 | 5  | 1.49 | 0.3 | 8  | 2.61 | 0.6 | 8  | 1.64 | 0.2 | 7  |
| 45656765 | molybdopterin oxidoreductase                                                                 | 1.40 | 0.4 | 36 | 1.31 | 0.5 | 35 | 3.02 | 1.3 | 35 | 1.02 | 0.5 | 37 | 2.28 | 1.0 | 36 | 2.27 | 0.8 | 37 |
| 45656766 | molybdopterin oxidoreductase membrane subunit                                                |      |     |    |      |     |    |      |     |    |      |     |    |      |     |    | 5.34 | 4.9 | 2  |
| 45656767 | hypothetical protein LIC10876                                                                | 1.31 | 0.4 | 6  | 1.25 | 0.2 | 6  | 4.40 | 2.7 | 6  | 1.00 | 0.4 | 7  | 2.77 | 1.0 | 6  | 2.88 | 1.1 | 6  |
| 45656768 | hypothetical protein LIC10877                                                                | 1.13 | 0.3 | 10 | 1.18 | 0.5 | 10 | 3.95 | 2.1 | 10 | 0.94 | 0.5 | 12 | 3.02 | 1.2 | 11 | 4.48 | 4.2 | 12 |
| 45656769 | hypothetical protein LIC10878                                                                | 1.68 | 0.4 | 3  | 1.11 | 0.3 | 3  | 3.61 | 1.4 | 2  | 0.65 | 0.1 | 3  | 2.37 | 0.5 | 2  | 3.87 | 0.9 | 2  |
| 45656770 | putative lipoprotein                                                                         | 1.35 | 0.3 | 6  | 1.01 | 0.3 | 4  | 3.42 | 0.8 | 5  | 0.76 | 0.2 | 4  | 2.44 | 0.6 | 4  | 2.80 | 0.3 | 4  |
| 45656791 | adenylate/guanylate cyclase                                                                  | 1.30 | 0.4 | 2  | 0.66 | 0.5 | 2  | 2.07 | 2.2 | 2  | 0.46 | 0.3 | 2  | 1.40 | 1.3 | 2  | 3.86 | 1.4 | 6  |
| 45656807 | hypothetical protein LIC10918                                                                |      |     |    | 1.13 | 0.3 | 3  | 0.44 | 0.2 | 3  |      |     |    |      |     |    | 0.41 | 0.2 | 3  |
| 45656816 | putative lipoprotein                                                                         | 0.90 | 0.2 | 6  | 1.05 | 0.2 | 7  | 0.38 | 0.2 | 6  | 1.23 | 0.4 | 6  | 0.52 | 0.2 | 5  | 0.34 | 0.1 | 6  |
| 45656836 | ABC transporter, ATP-binding protein 1-hydroxy-2-methyl-2-(E)-butenyl 4-diphosphate synthase | 1.43 | 0.3 | 2  | 0.85 | 0.5 | 2  | 0.95 | 0.4 | 2  | 0.57 | 0.2 | 2  | 0.65 | 0.1 | 2  | 1.21 | 0.3 | 2  |
| 45656843 | alcohol dehydrogenase                                                                        | 1.00 | 0.1 | 3  | 0.55 | 0.1 | 3  | 0.49 | 0.1 | 2  | 0.56 | 0.2 | 3  | 0.55 | 0.1 | 3  | 0.92 | 0.5 | 2  |
| 45656846 | alcohol dehydrogenase                                                                        | 0.65 | 0.4 | 4  | 0.99 | 0.5 | 4  | 0.84 | 0.2 | 3  | 1.94 | 1.4 | 4  | 1.33 | 0.8 | 3  | 0.82 | 0.4 | 3  |
| 45656847 | monooxygenase                                                                                | 1.43 | 0.2 | 7  | 1.20 | 0.3 | 7  | 4.38 | 0.7 | 6  | 0.87 | 0.3 | 6  | 3.27 | 0.8 | 6  | 2.92 | 1.1 | 7  |
| 45656854 | hypothetical protein LIC10966                                                                |      |     |    |      |     |    |      |     |    |      |     |    |      |     |    | 1.76 | 0.1 | 2  |
| 45656858 | acyl-CoA dehydrogenase                                                                       | 1.02 | 0.3 | 16 | 0.67 | 0.2 | 15 | 0.70 | 0.4 | 17 | 0.65 | 0.3 | 17 | 0.58 | 0.3 | 17 | 0.90 | 0.3 | 16 |
| 45656861 | outer membrane protein                                                                       | 1.19 | 0.1 | 8  | 0.91 | 0.2 | 7  | 4.17 | 1.3 | 8  | 0.65 | 0.1 | 7  | 3.40 | 1.1 | 8  | 4.34 | 1.2 | 7  |
| 45656862 | acetyl-CoA acetyltransferase                                                                 | 0.60 | 0.2 | 7  | 0.56 | 0.2 | 7  | 0.29 | 0.1 | 5  | 0.88 | 0.3 | 6  | 0.34 | 0.1 | 5  | 0.55 | 0.1 | 5  |
| 45656873 | hypothetical protein LIC10985                                                                | 1.30 | 0.2 | 5  | 0.63 | 0.4 | 5  | 0.53 | 0.3 | 4  | 0.45 | 0.3 | 5  | 0.51 | 0.2 | 5  | 1.47 | 1.6 | 4  |
| 45656890 | LipL71                                                                                       | 1.09 | 0.1 | 29 | 1.14 | 0.2 | 30 | 0.88 | 0.3 | 25 | 1.02 | 0.1 | 27 | 0.80 | 0.3 | 25 | 0.81 | 0.3 | 28 |
| 45656891 | anti-sigma factor antagonist                                                                 | 0.57 | 0.2 | 6  | 0.92 | 0.3 | 7  | 0.50 | 0.1 | 4  | 1.53 | 0.3 | 6  | 0.72 | 0.2 | 4  | 0.48 | 0.1 | 4  |
| 45656893 | transcriptional regulator (FUR family)                                                       |      |     |    | 1.32 | 0.3 | 2  | 0.78 | 0.2 | 2  |      |     |    |      |     |    | 0.63 | 0.3 | 2  |
| 45656896 | hypothetical protein LIC11009                                                                | 0.54 | 0.2 | 15 | 0.57 | 0.1 | 15 | 0.21 | 0.1 | 12 | 1.21 | 0.6 | 16 | 0.38 | 0.2 | 12 | 0.36 | 0.1 | 12 |
| 45656899 | OppA                                                                                         | 1.50 | 0.5 | 11 | 1.16 | 0.3 | 9  | 2.06 | 0.4 | 11 | 0.82 | 0.1 | 10 | 1.57 | 0.4 | 12 | 1.92 | 0.7 | 11 |
| 45656902 | adenylosuccinate lyase                                                                       | 0.83 | 0.1 | 2  | 0.76 | 0.5 | 2  |      |     |    | 0.89 | 0.4 | 2  |      |     |    |      |     |    |
| 45656912 | hypothetical protein LIC11028                                                                | 1.21 | 0.9 | 2  |      |     |    | 1.45 | 0.5 | 2  |      |     |    | 1.41 | 0.6 | 2  |      |     |    |
| 45656919 | hypothetical protein LIC11035                                                                | 0.48 | 0.0 | 2  |      |     |    |      |     |    |      |     |    |      |     |    |      |     |    |
| 45656920 | hypothetical protein LIC11036                                                                | 0.56 | 0.3 | 2  |      |     |    |      |     |    |      |     |    | 0.82 | 0.2 | 2  |      |     |    |
| 45656935 | hypothetical protein LIC11051                                                                | 0.55 | 0.2 | 2  | 0.53 | 0.0 | 2  |      |     |    | 1.01 | 0.4 | 2  |      |     |    |      |     |    |
| 45656942 | putative lipoprotein                                                                         |      |     |    |      |     |    |      |     |    | 5.80 | 0.0 | 2  |      |     |    |      |     |    |
| 45656943 | hypothetical protein LIC11059                                                                |      |     |    | 6.22 | 6.1 | 2  |      |     |    |      |     |    |      |     |    |      |     |    |
| 45656947 | prolipoprotein diacylglycerol transferase                                                    | 1.19 | 0.0 | 2  | 1.25 | 0.5 | 2  | 3.03 | 1.0 | 2  | 1.04 | 0.4 | 2  | 2.54 | 0.8 | 2  | 2.46 | 0.2 | 2  |
| 45656949 | poly A polymerase                                                                            | 1.57 | 0.6 | 5  | 1.31 | 0.9 | 5  | 3.72 | 1.1 | 6  | 0.45 | 0.3 | 4  | 2.21 | 1.0 | 6  | 3.32 | 1.9 | 4  |
| 45656958 | hypothetical protein LIC11074                                                                | 0.76 | 0.3 | 7  | 1.53 | 0.4 | 7  | 0.38 | 0.2 | 6  | 2.17 | 0.4 | 8  | 0.48 | 0.1 | 6  | 0.24 | 0.1 | 6  |
| 45656966 | cytoplasmic membrane protein                                                                 | 0.59 | 0.0 | 2  |      |     |    |      |     |    |      |     |    |      |     |    |      |     |    |
| 45656973 | hypothetical protein LIC11089                                                                | 1.16 | 0.2 | 4  | 0.59 | 0.1 | 4  |      |     |    | 0.51 | 0.1 | 4  |      |     |    |      |     |    |
| 45656979 | adenylate/guanylate cyclase                                                                  | 1.10 | 0.2 | 10 | 1.02 | 0.2 | 10 | 0.93 | 0.3 | 10 | 1.00 | 0.2 | 11 | 0.78 | 0.2 | 11 | 0.83 | 0.2 | 10 |
| 45656980 | hypothetical protein LIC11096                                                                | 0.87 | 0.1 | 2  | 1.67 | 1.2 | 2  | 2.16 | 2.0 | 2  | 2.37 | 1.2 | 3  | 2.69 | 1.5 | 3  | 1.10 | 0.3 | 3  |
| 45656985 | dihydroxy-acid dehydratase                                                                   | 0.95 | 0.2 | 3  | 1.07 | 0.1 | 3  | 0.42 | 0.1 | 3  | 1.15 | 0.2 | 3  | 0.45 | 0.1 | 3  | 0.40 | 0.1 | 3  |
| 45656999 | thiosulfate sulfurtransferase                                                                | 0.80 | 0.1 | 11 | 0.87 | 0.1 | 12 | 0.41 | 0.1 | 7  | 1.03 | 0.1 | 11 | 0.57 | 0.2 | 8  | 0.48 | 0.1 | 8  |
| 45657016 | pyruvate kinase                                                                              | 2.05 | 0.1 | 2  | 1.30 | 0.2 | 2  | 0.97 | 0.3 | 2  | 0.63 | 0.1 | 2  | 0.48 | 0.2 | 2  | 0.78 | 0.4 | 2  |
| 45657024 | alpha-galactosidase                                                                          | 2.02 | 1.2 | 4  | 0.89 | 0.7 | 3  | 1.11 | 0.5 | 3  | 0.52 | 0.3 | 3  | 0.78 | 0.5 | 3  | 2.90 | 1.9 | 3  |
| 45657025 | ribonuclease D                                                                               | 0.94 | 0.1 | 5  | 1.26 | 0.4 | 5  | 0.79 | 0.4 | 5  | 1.32 | 0.4 | 5  | 0.83 | 0.4 | 5  | 0.67 | 0.4 | 6  |
| 45657046 | hypothetical protein LIC11162                                                                | 1.24 | 0.3 | 2  | 0.94 | 0.3 | 2  | 0.48 | 0.5 | 2  | 0.75 | 0.1 | 2  | 0.35 | 0.3 | 2  | 0.45 | 0.4 | 2  |
| 45657066 | hypothetical protein LIC11182                                                                | 1.60 | 0.4 | 2  | 1.36 | 0.1 | 2  | 2.13 | 0.5 | 2  | 0.87 | 0.2 | 2  | 1.33 | 0.0 | 2  | 1.55 | 0.3 | 2  |
| 45657067 | hypothetical protein LIC11183                                                                | 0.18 | 0.1 | 5  | 1.08 | 0.7 | 7  | 0.12 | 0.1 | 2  | 5.18 | 3.0 | 5  | 0.84 | 0.7 | 2  | 0.13 | 0.1 | 2  |
| 45657072 | flagellar hook protein                                                                       | 1.03 | 0.1 | 4  | 0.92 | 0.3 | 4  | 3.20 | 0.9 | 4  | 0.90 | 0.3 | 4  | 3.11 | 0.8 | 4  | 3.54 | 1.0 | 4  |
| 45657078 | putative citrate lyase                                                                       | 0.81 | 0.1 | 14 | 0.87 | 0.2 | 13 | 0.55 | 0.2 | 13 | 1.11 | 0.3 | 14 | 0.65 | 0.2 | 13 | 0.72 | 0.5 | 14 |
| 45657080 | hypothetical protein LIC11196                                                                | 0.59 | 0.1 | 4  | 1.02 | 0.3 | 4  |      |     |    | 1.74 | 0.5 | 4  |      |     |    |      |     |    |
| 45657081 | hypothetical protein LIC11197                                                                | 0.81 | 0.1 | 2  | 1.42 | 0.1 | 2  | 1.04 | 1.2 | 2  | 1.77 | 0.2 | 2  | 1.44 | 1.7 | 2  | 0.75 | 0.9 | 2  |
| 45657082 | adenylate/guanylate cyclase                                                                  | 0.81 | 0.3 | 4  | 1.23 | 0.3 | 4  | 0.92 | 0.3 | 4  | 1.86 | 1.4 | 4  | 1.19 | 0.3 | 4  | 0.83 | 0.5 | 4  |

|          |                                                                  |      |     |    |      |     |    |      |     |    |      |     |    |       |     |    |      |     |    |
|----------|------------------------------------------------------------------|------|-----|----|------|-----|----|------|-----|----|------|-----|----|-------|-----|----|------|-----|----|
| 45657087 | response regulator                                               | 1.53 | 0.8 | 2  | 2.49 | 1.5 | 3  | 2.05 | 0.0 | 2  | 0.89 | 0.4 | 3  | 1.51  | 0.6 | 3  | 2.08 | 1.2 | 3  |
| 45657092 | hypothetical protein LIC11209                                    | 0.76 | 0.5 | 5  | 0.92 | 0.5 | 4  | 1.20 | 0.2 | 4  | 0.95 | 0.4 | 4  | 1.25  | 0.2 | 4  | 1.54 | 0.8 | 4  |
| 45657099 | methyl-accepting chemotaxis transducer transmembrane protein     | 1.26 | 0.4 | 6  | 2.02 | 0.7 | 5  | 3.98 | 1.3 | 5  | 2.11 | 1.1 | 7  | 3.50  | 1.4 | 5  | 1.38 | 0.4 | 5  |
| 45657102 | peroxiredoxin                                                    | 0.81 | 0.2 | 15 | 2.12 | 0.7 | 16 | 0.49 | 0.3 | 14 | 2.71 | 0.6 | 16 | 0.59  | 0.3 | 14 | 0.19 | 0.1 | 14 |
| 45657107 | hypothetical protein LIC11224                                    | 0.71 | 0.1 | 11 | 1.59 | 0.4 | 12 | 1.49 | 0.3 | 12 | 2.02 | 0.4 | 10 | 1.90  | 0.5 | 10 | 0.89 | 0.3 | 12 |
| 45657116 | signal peptidase I                                               | 1.74 | 0.2 | 2  | 1.87 | 0.5 | 2  |      |     |    | 1.07 | 0.2 | 2  |       |     |    |      |     |    |
| 45657120 | ATP synthase A chain                                             | 2.20 | 1.1 | 2  | 2.11 | 1.4 | 2  | 4.90 | 3.0 | 2  | 1.08 | 0.3 | 3  | 2.35  | 0.4 | 3  | 2.21 | 0.2 | 3  |
| 45657122 | ATP synthase B chain                                             | 0.74 | 0.0 | 7  | 0.39 | 0.2 | 7  | 1.46 | 0.2 | 7  | 0.52 | 0.2 | 7  | 1.94  | 0.2 | 7  | 3.69 | 1.3 | 6  |
| 45657123 | ATP synthase delta chain                                         | 0.73 | 0.1 | 2  | 1.25 | 1.0 | 2  | 1.51 | 1.4 | 2  |      |     |    |       |     |    | 1.11 | 0.2 | 2  |
| 45657124 | ATP synthase subunit A                                           | 1.33 | 0.3 | 24 | 0.93 | 0.3 | 23 | 1.38 | 0.5 | 23 | 0.76 | 0.3 | 24 | 1.17  | 0.6 | 25 | 1.43 | 0.4 | 22 |
| 45657125 | ATP synthase gamma chain                                         | 1.27 | 0.2 | 4  | 1.42 | 0.6 | 4  | 3.26 | 1.4 | 4  | 1.12 | 0.4 | 4  | 2.07  | 1.1 | 6  | 2.69 | 1.9 | 4  |
| 45657126 | ATP synthase subunit B                                           | 1.27 | 0.2 | 18 | 0.96 | 0.4 | 19 | 1.21 | 0.3 | 18 | 0.77 | 0.3 | 19 | 1.03  | 0.3 | 18 | 1.27 | 0.4 | 19 |
| 45657141 | MreB                                                             | 1.07 | 0.1 | 20 | 1.20 | 0.3 | 20 | 1.19 | 0.4 | 21 | 1.21 | 0.3 | 22 | 1.19  | 0.4 | 22 | 0.96 | 0.2 | 21 |
| 45657142 | MreC                                                             | 1.31 | 0.7 | 6  | 1.17 | 0.7 | 6  | 2.65 | 1.2 | 6  | 0.95 | 0.5 | 6  | 2.12  | 0.5 | 6  | 1.94 | 0.4 | 5  |
| 45657155 | hypothetical protein LIC11273                                    | 0.98 | 0.3 | 5  | 0.94 | 0.1 | 5  | 0.43 | 0.2 | 4  | 1.08 | 0.3 | 6  | 0.51  | 0.2 | 5  | 0.49 | 0.2 | 5  |
| 45657156 | hypothetical protein LIC11274                                    | 1.03 | 0.5 | 7  | 1.18 | 0.4 | 5  | 2.46 | 0.9 | 7  | 1.61 | 1.3 | 6  | 2.36  | 1.6 | 7  | 2.01 | 0.5 | 5  |
| 45657162 | peptide chain release factor 3                                   | 0.69 | 0.2 | 2  |      |     |    |      |     |    |      |     |    |       |     |    |      |     |    |
| 45657174 | hypothetical protein LIC11294                                    | 1.38 | 0.4 | 20 | 1.31 | 0.5 | 21 | 2.53 | 0.9 | 18 | 0.83 | 0.3 | 19 | 2.03  | 0.7 | 18 | 2.32 | 1.0 | 21 |
| 45657179 | putative lipoprotein                                             | 0.76 | 0.0 | 2  | 0.80 | 0.2 | 2  | 0.51 | 0.1 | 2  | 1.07 | 0.3 | 2  | 0.68  | 0.1 | 2  | 0.67 | 0.3 | 2  |
| 45657190 | bacterioferritin                                                 | 0.32 | 0.1 | 2  | 0.98 | 0.0 | 2  | 2.77 | 0.8 | 2  | 3.42 | 1.5 | 2  | 10.45 | 7.4 | 2  | 3.22 | 0.9 | 3  |
| 45657193 | aminopeptidase P                                                 | 0.66 | 0.4 | 2  | 1.15 | 0.1 | 2  |      |     |    | 2.18 | 1.3 | 2  |       |     |    |      |     |    |
| 45657200 | hypothetical protein LIC11320                                    | 1.20 | 0.7 | 3  |      |     |    |      |     |    |      |     |    |       |     |    |      |     |    |
| 45657207 | flagellar P-ring protein precursor                               | 0.77 | 0.1 | 2  |      |     |    | 2.51 | 0.0 | 2  |      |     |    | 3.26  | 0.2 | 2  |      |     |    |
| 45657212 | hypothetical protein LIC11334                                    | 0.58 | 0.3 | 3  | 0.89 | 0.2 | 3  | 1.26 | 0.2 | 3  | 1.84 | 0.9 | 3  | 2.92  | 2.2 | 3  | 1.45 | 0.4 | 3  |
| 45657213 | GroEL                                                            | 1.40 | 0.2 | 30 | 1.01 | 0.2 | 30 | 1.29 | 0.4 | 30 | 0.73 | 0.1 | 33 | 0.92  | 0.3 | 30 | 1.29 | 0.4 | 32 |
| 45657214 | GroES                                                            | 0.91 | 0.1 | 11 | 0.19 | 0.0 | 10 | 0.09 | 0.0 | 9  | 0.20 | 0.0 | 10 | 0.10  | 0.0 | 10 | 0.46 | 0.2 | 10 |
| 45657230 | LipL32                                                           | 0.82 | 0.1 | 24 | 0.50 | 0.2 | 24 | 0.14 | 0.0 | 18 | 0.62 | 0.2 | 24 | 0.17  | 0.0 | 17 | 0.29 | 0.1 | 19 |
| 45657232 | S-adenosylmethionine synthetase                                  | 0.77 | 0.2 | 20 | 0.92 | 0.2 | 20 | 0.45 | 0.1 | 15 | 1.07 | 0.2 | 21 | 0.57  | 0.1 | 16 | 0.52 | 0.1 | 15 |
| 45657233 | transketolase                                                    | 1.87 | 1.5 | 3  | 2.08 | 1.8 | 3  | 0.49 | 0.4 | 2  | 1.05 | 0.1 | 3  | 0.43  | 0.2 | 2  | 0.42 | 0.2 | 2  |
| 45657237 | MaoC                                                             | 0.77 | 0.2 | 14 | 0.97 | 0.2 | 15 | 0.33 | 0.2 | 13 | 1.22 | 0.3 | 15 | 0.38  | 0.2 | 12 | 0.30 | 0.1 | 12 |
| 45657240 | hypothetical protein LIC11362                                    | 0.48 | 0.0 | 2  |      |     |    |      |     |    |      |     |    |       |     |    |      |     |    |
| 45657242 | short-chain dehydrogenase                                        | 1.18 | 0.3 | 10 | 1.27 | 0.4 | 10 | 0.85 | 0.7 | 11 | 1.32 | 0.5 | 10 | 0.70  | 0.3 | 10 | 0.50 | 0.3 | 11 |
| 45657248 | flagellar motor switch protein                                   | 1.01 | 0.0 | 4  | 0.68 | 0.1 | 4  | 0.65 | 0.1 | 4  | 0.82 | 0.2 | 4  | 0.65  | 0.1 | 4  | 0.81 | 0.2 | 4  |
| 45657256 | septum site-determining protein                                  | 3.23 | 3.6 | 2  | 0.82 | 0.5 | 2  |      |     |    | 0.47 | 0.4 | 2  |       |     |    |      |     |    |
| 45657258 | sigma factor WhiG                                                | 0.87 | 0.1 | 8  | 0.62 | 0.1 | 8  | 0.35 | 0.2 | 9  | 0.75 | 0.1 | 7  | 0.45  | 0.2 | 9  | 0.62 | 0.3 | 9  |
| 45657269 | flagellar M-ring protein                                         | 1.10 | 0.1 | 4  | 0.95 | 0.1 | 5  | 2.87 | 0.4 | 4  | 0.88 | 0.1 | 4  | 2.29  | 0.5 | 4  | 3.04 | 0.5 | 4  |
| 45657282 | hypothetical protein LIC11405                                    | 1.23 | 0.4 | 10 | 1.08 | 0.3 | 9  | 1.56 | 1.0 | 9  | 0.85 | 0.3 | 10 | 0.92  | 0.4 | 7  | 1.36 | 0.6 | 8  |
| 45657285 | hypothetical protein LIC11408                                    | 0.72 | 0.2 | 9  | 0.74 | 0.2 | 6  | 0.52 | 0.1 | 7  | 1.03 | 0.3 | 7  | 0.83  | 0.4 | 8  | 0.77 | 0.3 | 7  |
| 45657286 | acetolactate synthase large subunit                              | 0.86 | 0.4 | 11 | 1.07 | 0.7 | 11 | 1.80 | 2.6 | 8  | 1.07 | 0.5 | 12 | 1.73  | 1.5 | 8  | 1.98 | 1.5 | 9  |
| 45657290 | glycosyl hydrolase FKBP-type peptidyl-prolyl cis-trans isomerase | 1.16 | 0.2 | 11 | 1.42 | 0.8 | 10 | 1.08 | 0.2 | 7  | 1.29 | 0.6 | 10 | 1.13  | 0.4 | 7  | 0.64 | 0.2 | 7  |
| 45657292 | ATP-dependent Clp protease, proteolytic subunit                  | 0.87 | 0.1 | 12 | 0.99 | 0.2 | 12 | 0.10 | 0.0 | 4  | 1.18 | 0.2 | 12 | 0.11  | 0.1 | 4  | 0.10 | 0.1 | 4  |
| 45657293 | ATP-dependent protease ATP-binding subunit                       | 0.81 | 0.1 | 5  | 0.94 | 0.2 | 6  | 0.65 | 0.5 | 5  | 1.13 | 0.1 | 5  | 0.44  | 0.3 | 4  | 0.62 | 0.4 | 5  |
| 45657294 | phosphate sodium symporter                                       | 0.94 | 0.2 | 10 | 0.82 | 0.2 | 7  | 0.70 | 0.4 | 8  | 0.84 | 0.2 | 7  | 0.70  | 0.4 | 8  | 0.57 | 0.3 | 5  |
| 45657297 | glycine rich RNA-binding protein                                 | 1.47 | 0.6 | 7  | 1.49 | 0.4 | 5  | 4.12 | 2.3 | 6  | 1.61 | 0.5 | 8  | 3.78  | 1.1 | 8  | 2.22 | 0.6 | 7  |
| 45657299 | peptidyl-prolyl cis-trans isomerase                              | 0.79 | 0.0 | 2  | 0.07 | 0.0 | 2  |      |     |    | 0.09 | 0.0 | 2  |       |     |    |      |     |    |
| 45657300 | cyclic nucleotide binding protein                                | 0.50 | 0.1 | 2  | 1.23 | 0.2 | 2  |      |     |    | 2.62 | 1.1 | 2  |       |     |    |      |     |    |
| 45657307 | hypothetical protein LIC11436                                    | 0.66 | 0.4 | 3  | 1.14 | 0.4 | 3  |      |     |    | 2.97 | 3.3 | 3  |       |     |    |      |     |    |
| 45657312 | adenylate/guanylate cyclase                                      | 0.96 | 0.1 | 2  | 0.51 | 0.0 | 2  |      |     |    | 0.53 | 0.0 | 2  |       |     |    |      |     |    |
| 45657313 | peptidyl-prolyl cis-trans isomerase                              | 1.07 | 0.1 | 8  | 0.59 | 0.2 | 8  | 1.37 | 0.7 | 9  | 0.56 | 0.1 | 8  | 1.26  | 0.5 | 9  | 2.06 | 0.4 | 7  |
| 45657314 | hypothetical protein LIC11442                                    | 1.29 | 1.0 | 3  | 1.32 | 0.6 | 3  | 0.13 | 0.1 | 2  | 1.16 | 0.3 | 3  | 0.18  | 0.1 | 2  | 0.13 | 0.1 | 2  |
| 45657318 | response regulator                                               | 0.64 | 0.1 | 2  |      |     |    | 4.10 | 4.9 | 2  |      |     |    | 7.58  | 5.6 | 3  |      |     |    |
| 45657320 | outer membrane protein, porin superfamily                        | 1.19 | 0.2 | 5  | 1.39 | 0.2 | 3  | 1.77 | 0.8 | 5  | 1.20 | 0.1 | 3  | 1.48  | 0.7 | 5  | 1.46 | 0.5 | 3  |
| 45657331 | glutamyl-tRNA(Gln) amidotransferase subunit C                    | 1.00 | 0.2 | 8  | 1.02 | 0.1 | 9  | 1.36 | 0.4 | 9  | 0.94 | 0.4 | 9  | 1.28  | 0.2 | 8  | 1.24 | 0.5 | 9  |
| 45657333 | glutamyl-tRNA(Gln) amidotransferase subunit A                    | 0.94 | 0.2 | 2  | 0.61 | 0.1 | 2  | 2.11 | 0.6 | 2  | 0.68 | 0.2 | 2  | 2.23  | 0.2 | 2  | 3.52 | 1.4 | 2  |
| 45657335 | hypothetical protein LIC11468                                    | 1.03 | 0.6 | 2  |      |     |    |      |     |    |      |     |    |       |     |    |      |     |    |
| 45657336 | thioredoxin reductase                                            | 0.97 | 0.1 | 2  | 0.63 | 0.2 | 4  |      |     |    | 0.78 | 0.1 | 2  |       |     |    |      |     |    |
| 45657343 | hypothetical protein LIC11489                                    | 1.14 | 0.4 | 4  | 1.66 | 0.7 | 3  |      |     |    | 1.24 | 0.3 | 3  |       |     |    |      |     |    |
| 45657345 | hypothetical protein LIC11498                                    | 0.76 | 0.5 | 5  | 1.04 | 0.4 | 6  | 0.35 | 0.0 | 4  | 1.14 | 0.5 | 4  | 2.70  | 4.4 | 4  | 0.44 | 0.1 | 4  |
| 45657364 | hypothetical protein LIC11498                                    | 1.04 | 0.2 | 18 | 1.09 | 0.2 | 15 | 0.86 | 0.5 | 16 | 1.06 | 0.3 | 15 | 0.76  | 0.4 | 16 | 0.72 | 0.2 | 14 |
| 45657373 | hypothetical protein LIC11498                                    | 1.21 | 0.1 | 2  | 1.14 | 0.1 | 2  | 2.49 | 0.4 | 2  | 0.95 | 0.1 | 2  | 2.08  | 0.5 | 2  | 2.18 | 0.2 | 2  |

|          |                                                         |      |     |    |       |     |    |      |     |    |       |     |    |      |      |    |      |     |    |
|----------|---------------------------------------------------------|------|-----|----|-------|-----|----|------|-----|----|-------|-----|----|------|------|----|------|-----|----|
| 45657374 | hypothetical protein LIC11499                           | 0.36 | 0.0 | 3  | 0.06  | 0.0 | 3  | 0.04 | 0.0 | 2  | 0.18  | 0.0 | 3  | 0.11 | 0.0  | 2  | 0.70 | 0.2 | 2  |
| 45657385 | putative polypeptide deformylase protein                | 0.64 | 0.2 | 4  | 0.46  | 0.2 | 4  | 0.35 | 0.1 | 3  | 0.79  | 0.5 | 4  | 0.57 | 0.3  | 3  | 0.91 | 0.5 | 3  |
| 45657387 | hypothetical protein LIC11514                           | 0.48 | 0.2 | 4  | 0.60  | 0.5 | 4  | 0.34 | 0.3 | 3  | 1.64  | 2.0 | 4  | 0.94 | 1.1  | 3  | 0.42 | 0.2 | 3  |
| 45657390 | acetyl-CoA carboxylase alpha subunit                    | 0.92 | 0.2 | 9  | 0.90  | 0.2 | 11 | 0.83 | 0.2 | 9  | 0.92  | 0.1 | 9  | 0.83 | 0.2  | 9  | 0.92 | 0.2 | 9  |
| 45657391 | biotin carboxylase subunit of acetyl CoA carboxylase    | 1.19 | 0.4 | 8  | 0.99  | 0.2 | 7  | 0.84 | 0.2 | 6  | 0.79  | 0.3 | 10 | 0.73 | 0.2  | 6  | 0.86 | 0.2 | 6  |
| 45657396 | chemotaxis protein                                      | 1.72 | 0.4 | 26 | 1.12  | 0.5 | 25 | 0.98 | 0.7 | 19 | 0.63  | 0.2 | 23 | 0.50 | 0.3  | 19 | 0.87 | 0.6 | 18 |
| 45657399 | chemotaxis response regulator                           | 1.03 | 0.5 | 4  | 0.18  | 0.0 | 2  |      |     |    | 0.18  | 0.0 | 2  |      |      |    |      |     |    |
| 45657400 | histidine kinase response regulator hybrid protein      |      |     |    |       |     |    |      |     |    | 1.02  | 0.4 | 2  | 1.65 | 0.4  | 3  | 1.48 | 0.2 | 2  |
| 45657402 | penicillin tolerance protein                            | 0.70 | 0.3 | 3  | 0.74  | 0.1 | 3  |      |     |    | 1.13  | 0.3 | 3  | 0.42 | 0.2  | 2  |      |     |    |
| 45657404 | flagellin protein                                       | 0.81 | 0.5 | 5  | 0.95  | 0.2 | 5  | 6.16 | 3.5 | 6  | 0.81  | 0.2 | 5  | 4.10 | 0.9  | 5  | 5.38 | 2.0 | 5  |
| 45657405 | flagellin protein                                       | 1.32 | 0.3 | 6  | 1.61  | 0.1 | 4  | 5.63 | 2.1 | 7  | 1.21  | 0.3 | 4  | 3.41 | 0.8  | 6  | 2.93 | 0.9 | 6  |
| 45657414 | 2-dehydro-3-deoxyphosphooctonate aldolase               | 0.97 | 0.1 | 4  | 1.81  | 0.5 | 4  | 0.61 | 0.3 | 3  | 1.87  | 0.5 | 4  | 0.62 | 0.4  | 3  | 0.42 | 0.3 | 3  |
| 45657417 | ABC transporter, ATP-binding protein                    | 1.12 | 0.3 | 2  | 1.12  | 0.2 | 2  | 1.38 | 0.1 | 2  | 0.82  | 0.3 | 3  | 1.24 | 0.2  | 3  | 1.71 | 0.8 | 3  |
| 45657426 | serine/threonine kinase                                 | 1.31 | 0.4 | 2  | 0.93  | 0.7 | 2  |      |     |    | 0.66  | 0.4 | 2  |      |      |    |      |     |    |
| 45657428 | 30S ribosomal protein S16                               | 0.89 | 0.5 | 8  | 0.01  | 0.0 | 2  |      |     |    | 0.02  | 0.0 | 2  |      |      |    |      |     |    |
| 45657432 | 50S ribosomal protein L19                               | 1.09 | 0.1 | 6  | 0.70  | 0.1 | 6  | 0.42 | 0.1 | 5  | 0.67  | 0.1 | 5  | 0.38 | 0.1  | 5  | 0.60 | 0.2 | 5  |
| 45657443 | general secretory pathway protein D                     | 1.29 | 0.4 | 7  | 1.01  | 0.2 | 7  | 2.04 | 1.0 | 8  | 0.76  | 0.3 | 8  | 1.76 | 1.1  | 9  | 2.40 | 0.5 | 7  |
| 45657446 | general secretory pathway protein G                     | 0.99 | 0.2 | 6  | 1.03  | 0.2 | 6  | 0.26 | 0.1 | 5  | 1.10  | 0.2 | 7  | 0.26 | 0.1  | 6  | 0.23 | 0.1 | 6  |
| 45657451 | FtsA                                                    | 1.40 | 0.5 | 6  | 1.34  | 0.3 | 5  | 2.00 | 1.5 | 5  | 0.97  | 0.3 | 5  | 2.26 | 2.0  | 6  | 2.04 | 2.1 | 5  |
| 45657460 | ribonucleotide-diphosphate reductase alpha subunit      | 1.27 | 0.3 | 10 | 1.26  | 0.5 | 12 | 0.43 | 0.2 | 6  | 1.50  | 1.1 | 13 | 0.75 | 0.5  | 7  | 0.47 | 0.3 | 7  |
| 45657469 | 2-isopropylmalate synthase 2                            | 0.99 | 0.4 | 2  | 0.81  | 0.9 | 2  |      |     |    | 0.69  | 0.7 | 2  |      |      |    |      |     |    |
| 45657473 | ATP-dependent protease ATP-binding subunit              | 1.17 | 0.0 | 3  | 0.98  | 0.1 | 2  |      |     |    | 0.83  | 0.1 | 2  |      |      |    |      |     |    |
| 45657474 | hypothetical protein LIC11602                           | 1.28 | 0.3 | 4  | 2.35  | 1.8 | 6  | 4.92 | 2.8 | 5  | 0.84  | 0.0 | 4  | 2.74 | 0.9  | 5  | 3.23 | 1.7 | 6  |
| 45657485 | GTP-binding protein                                     | 1.11 | 0.6 | 2  | 0.96  | 0.7 | 2  |      |     |    | 0.82  | 0.2 | 2  |      |      |    |      |     |    |
| 45657489 | transcriptional regulator (ArsR family)                 | 0.87 | 0.2 | 17 | 0.11  | 0.0 | 12 | 0.16 | 0.0 | 12 | 0.13  | 0.0 | 12 | 0.19 | 0.0  | 12 | 1.45 | 0.2 | 12 |
| 45657490 | 3-ketoacyl-(acyl-carrier-protein) reductase             | 0.72 | 0.2 | 6  | 1.01  | 0.9 | 7  | 1.00 | 1.3 | 4  | 0.96  | 0.2 | 6  | 0.64 | 0.5  | 4  | 0.62 | 0.3 | 4  |
| 45657491 | hypothetical protein LIC11619                           |      |     |    |       |     |    |      |     |    | 0.59  | 0.3 | 2  | 0.69 | 0.0  | 2  | 1.35 | 0.7 | 2  |
| 45657493 | biopolymer transport protein                            | 0.59 | 0.1 | 3  | 0.85  | 0.3 | 3  | 1.17 | 0.2 | 3  | 1.72  | 0.7 | 4  | 1.97 | 0.7  | 4  | 1.30 | 0.7 | 4  |
| 45657494 | biopolymer transport exbd-related transmembrane protein | 1.55 | 0.2 | 2  | 1.07  | 0.3 | 3  |      |     |    | 0.78  | 0.0 | 2  |      |      |    |      |     |    |
| 45657497 | hypothetical protein LIC11625                           | 0.92 | 0.2 | 4  | 0.29  | 0.1 | 4  | 1.32 | 0.5 | 4  | 0.32  | 0.1 | 4  | 1.46 | 0.5  | 4  | 4.67 | 1.4 | 4  |
| 45657502 | long-chain-fatty-acid CoA ligase                        | 1.16 | 0.2 | 10 | 1.23  | 0.3 | 10 | 1.48 | 0.5 | 8  | 0.95  | 0.2 | 9  | 1.10 | 0.3  | 7  | 1.00 | 0.2 | 8  |
| 45657508 | hypothetical protein LIC11636                           | 1.45 | 0.3 | 3  | 1.29  | 0.3 | 3  | 1.96 | 0.2 | 3  | 0.89  | 0.0 | 3  | 1.38 | 0.2  | 3  | 1.55 | 0.2 | 3  |
| 45657509 | hypothetical protein LIC11637                           | 1.78 | 0.4 | 4  | 0.95  | 0.1 | 3  | 2.97 | 2.0 | 2  | 0.58  | 0.2 | 3  | 1.65 | 0.5  | 2  | 2.92 | 1.7 | 2  |
| 45657514 | hypothetical protein LIC11642                           |      |     |    |       |     |    |      |     |    | 1.29  | 0.6 | 2  |      |      |    |      |     |    |
| 45657515 | LipL45                                                  | 1.28 | 0.9 | 19 | 1.94  | 1.7 | 18 | 2.46 | 3.1 | 18 | 1.44  | 0.9 | 18 | 1.27 | 0.6  | 18 | 0.83 | 0.2 | 15 |
| 45657522 | transaldolase                                           | 0.92 | 0.3 | 8  | 1.13  | 0.4 | 7  | 0.78 | 0.2 | 7  | 1.29  | 0.4 | 8  | 0.84 | 0.3  | 6  | 0.71 | 0.2 | 7  |
| 45657523 | hypothetical protein LIC11653                           |      |     |    |       |     |    |      |     |    |       |     |    |      |      |    | 3.55 | 0.9 | 2  |
| 45657525 | PurH                                                    | 1.17 | 0.1 | 3  | 0.68  | 0.2 | 3  | 0.95 | 0.0 | 2  | 0.59  | 0.2 | 3  | 0.85 | 0.2  | 2  | 1.19 | 0.2 | 2  |
| 45657536 | hypothetical protein LIC11668                           | 1.90 | 0.0 | 2  | 1.11  | 0.0 | 2  |      |     |    | 0.59  | 0.0 | 2  |      |      |    |      |     |    |
| 45657542 | alkylglycerone-phosphate synthase                       | 1.06 | 0.7 | 2  | 1.61  | 0.6 | 2  | 0.91 | 0.1 | 2  | 1.88  | 1.7 | 3  | 1.05 | 0.7  | 3  | 0.62 | 0.1 | 3  |
| 45657551 | hypothetical protein LIC11685                           | 0.59 | 0.1 | 2  |       |     |    |      |     |    |       |     |    |      |      |    |      |     |    |
| 45657553 | endonuclease                                            | 1.80 | 0.9 | 2  | 3.16  | 0.8 | 2  | 5.87 | 0.1 | 2  | 2.15  | 1.5 | 2  | 3.79 | 1.4  | 3  | 3.36 | 2.5 | 3  |
| 45657559 | hypothetical protein LIC11693                           | 0.66 | 0.4 | 3  | 1.31  | 0.0 | 3  | 0.66 | 0.2 | 2  | 3.21  | 1.8 | 4  | 7.72 | 10.1 | 3  | 1.75 | 2.1 | 3  |
| 45657565 | glycerol-3-phosphate dehydrogenase                      | 1.10 | 0.6 | 2  | 0.85  | 0.5 | 2  |      |     |    | 0.78  | 0.0 | 2  |      |      |    |      |     |    |
| 45657567 | RNA polymerase sigma-70 factor                          | 1.03 | 0.2 | 12 | 0.67  | 0.2 | 11 | 0.79 | 0.2 | 11 | 0.63  | 0.1 | 11 | 0.68 | 0.1  | 11 | 1.08 | 0.4 | 12 |
| 45657569 | hypothetical protein LIC11703                           | 0.63 | 0.0 | 4  | 0.49  | 0.1 | 4  |      |     |    | 0.78  | 0.3 | 6  |      |      |    |      |     |    |
| 45657570 | 30S ribosomal protein S21                               | 0.68 | 0.1 | 2  |       |     |    |      |     |    |       |     |    |      |      |    |      |     |    |
| 45657574 | histidine kinase response regulator hybrid protein      | 1.32 | 0.4 | 6  | 2.15  | 1.1 | 7  | 7.06 | 3.0 | 7  | 1.22  | 0.1 | 8  | 5.59 | 1.5  | 8  | 3.70 | 1.0 | 9  |
| 45657575 | histidine kinase response regulator hybrid protein      | 1.69 | 0.8 | 15 | 1.79  | 1.2 | 13 | 5.34 | 3.4 | 12 | 1.01  | 0.3 | 13 | 3.03 | 1.2  | 12 | 4.01 | 0.8 | 11 |
| 45657579 | motility protein B                                      | 0.93 | 0.1 | 2  | 0.84  | 0.3 | 3  | 2.37 | 0.5 | 3  | 0.75  | 0.3 | 2  | 1.94 | 0.8  | 4  | 2.96 | 0.6 | 3  |
| 45657583 | nucleotide excision repair subunit A                    | 1.02 | 0.3 | 3  | 0.88  | 0.1 | 3  | 0.28 | 0.2 | 2  | 0.89  | 0.2 | 3  | 0.30 | 0.2  | 2  | 0.35 | 0.3 | 2  |
| 45657592 | UVRABC                                                  |      |     |    |       |     |    |      |     |    |       |     |    |      |      |    |      |     |    |
| 45657592 | 2-isopropylmalate synthase                              | 0.98 | 0.1 | 5  | 0.65  | 0.3 | 4  | 0.46 | 0.1 | 2  | 0.67  | 0.3 | 4  | 0.48 | 0.1  | 2  | 1.11 | 1.0 | 2  |
| 45657595 | 2,4-dienoyl-coa reductase                               | 0.85 | 0.2 | 3  | 1.35  | 0.4 | 4  | 2.66 | 0.9 | 4  | 1.52  | 0.4 | 3  | 2.77 | 0.7  | 3  | 1.74 | 0.5 | 4  |
| 45657597 | FKBP-type peptidyl-prolyl cis-trans isomerase           | 1.57 | 1.1 | 3  | 2.40  | 0.2 | 3  | 0.71 | 0.4 | 3  | 1.91  | 0.9 | 3  | 0.49 | 0.2  | 3  | 0.29 | 0.1 | 3  |
| 45657605 | hypothetical protein LIC11739                           | 0.81 | 0.3 | 2  |       |     |    | 0.31 | 0.2 | 2  |       |     |    | 0.36 | 0.1  | 2  |      |     |    |
| 45657606 | PmbA                                                    | 0.91 | 0.3 | 4  | 0.95  | 0.5 | 4  | 0.58 | 0.3 | 3  | 1.14  | 0.7 | 4  | 0.65 | 0.3  | 3  | 0.49 | 0.2 | 3  |
| 45657607 | TldD                                                    | 0.94 | 0.2 | 3  | 0.69  | 0.5 | 3  |      |     |    | 0.79  | 0.5 | 4  | 0.70 | 0.4  | 2  | 0.71 | 0.6 | 2  |
| 45657611 | recombinase A                                           | 0.89 | 0.2 | 7  | 13.19 | 7.9 | 8  | 0.63 | 0.7 | 4  | 13.58 | 8.4 | 8  | 0.50 | 0.2  | 4  | 0.22 | 0.4 | 4  |
| 45657612 | N-acetyl-gamma-glutamyl-phosphate reductase             | 1.07 | 0.6 | 4  | 1.74  | 0.8 | 4  | 0.83 | 0.5 | 4  | 2.10  | 1.1 | 4  | 0.95 | 0.5  | 4  | 0.46 | 0.1 | 4  |

|          |                                                             |      |     |    |      |     |    |      |     |    |      |     |    |       |     |      |      |     |    |
|----------|-------------------------------------------------------------|------|-----|----|------|-----|----|------|-----|----|------|-----|----|-------|-----|------|------|-----|----|
| 45657616 | hypothetical protein LIC11750                               | 0.36 | 0.2 | 4  | 1.00 | 0.4 | 7  | 0.81 | 0.5 | 2  | 2.12 | 0.6 | 5  |       |     | 0.94 | 0.5  | 2   |    |
| 45657617 | lipopolysaccharide core biosynthesis protein                | 1.53 | 1.3 | 3  | 1.25 | 1.9 | 3  | 6.63 | 8.7 | 2  | 0.50 | 0.6 | 3  | 2.36  | 2.7 | 2    | 2.80 | 1.3 | 2  |
| 45657618 | glycosyl transferase                                        | 1.77 | 0.5 | 4  | 2.54 | 0.5 | 3  | 4.67 | 1.7 | 4  | 1.36 | 0.1 | 4  | 2.93  | 0.3 | 5    | 2.13 | 0.2 | 4  |
| 45657626 | 50S ribosomal protein L28                                   | 0.96 | 0.3 | 5  | 0.18 | 0.0 | 2  | 0.21 | 0.2 | 2  | 0.22 | 0.0 | 2  | 0.18  | 0.2 | 2    |      |     |    |
| 45657633 | N-acetylornithine aminotransferase                          | 1.07 | 0.3 | 6  | 1.06 | 0.5 | 6  | 0.59 | 0.2 | 6  | 0.76 | 0.2 | 5  | 0.52  | 0.2 | 6    | 0.56 | 0.1 | 5  |
| 45657634 | 3-isopropylmalate dehydrogenase                             | 0.77 | 0.1 | 5  | 0.72 | 0.2 | 6  | 0.31 | 0.1 | 2  | 0.96 | 0.2 | 5  | 0.41  | 0.1 | 2    | 0.37 | 0.1 | 2  |
| 45657635 | response regulator                                          | 0.68 | 0.1 | 6  | 0.48 | 0.1 | 6  | 0.19 | 0.0 | 5  | 0.70 | 0.1 | 6  | 0.28  | 0.1 | 5    | 0.46 | 0.1 | 5  |
| 45657647 | malate dehydrogenase                                        | 0.71 | 0.1 | 15 | 1.10 | 0.2 | 13 | 0.55 | 0.2 | 15 | 1.38 | 0.3 | 14 | 0.78  | 0.2 | 15   | 0.51 | 0.1 | 15 |
| 45657648 | hypothetical protein LIC11782                               | 0.79 | 0.1 | 10 | 1.11 | 0.1 | 10 | 0.09 | 0.0 | 6  | 1.35 | 0.2 | 10 | 0.10  | 0.0 | 6    | 0.09 | 0.1 | 7  |
| 45657656 | aspartate aminotransferase                                  | 0.68 | 0.1 | 5  | 0.77 | 0.1 | 5  | 0.35 | 0.1 | 5  | 1.16 | 0.2 | 5  | 0.57  | 0.2 | 5    | 0.65 | 0.4 | 5  |
| 45657657 | ATP-dependent DNA helicase                                  | 0.92 | 0.3 | 11 | 0.94 | 0.7 | 10 | 0.86 | 0.7 | 11 | 0.82 | 0.2 | 11 | 0.62  | 0.3 | 11   | 0.71 | 0.2 | 10 |
| 45657659 | endopeptidase IV                                            | 1.20 | 0.2 | 11 | 0.95 | 0.2 | 12 | 1.27 | 0.5 | 12 | 0.86 | 0.1 | 12 | 1.03  | 0.3 | 11   | 1.40 | 0.6 | 12 |
| 45657665 | glycerol kinase                                             | 1.11 | 0.2 | 7  | 1.55 | 0.3 | 6  | 1.97 | 1.2 | 8  | 1.34 | 0.3 | 7  | 1.94  | 0.8 | 8    | 1.52 | 0.3 | 7  |
| 45657676 | hypothetical protein LIC11811                               | 1.08 | 0.2 | 2  |      |     |    | 0.98 | 0.5 | 2  |      |     |    | 0.89  | 0.3 | 2    |      |     |    |
| 45657685 | cysteine synthase                                           | 1.22 | 0.5 | 4  | 3.29 | 3.1 | 3  | 0.67 | 0.1 | 2  | 2.35 | 2.2 | 3  | 0.49  | 0.1 | 2    | 0.45 | 0.1 | 2  |
| 45657686 | 3-isopropylmalate dehydratase small subunit                 | 0.74 | 0.1 | 7  | 0.97 | 0.3 | 7  | 0.30 | 0.1 | 3  | 1.28 | 0.3 | 8  | 0.41  | 0.1 | 3    | 0.44 | 0.1 | 3  |
| 45657687 | isopropylmalate isomerase large subunit                     | 0.76 | 0.1 | 7  | 0.99 | 0.2 | 7  | 0.46 | 0.3 | 6  | 1.25 | 0.2 | 6  | 0.62  | 0.5 | 6    | 0.55 | 0.5 | 6  |
| 45657697 | putative lipoprotein                                        | 0.97 | 0.2 | 7  | 0.69 | 0.6 | 7  | 1.06 | 0.8 | 6  | 0.71 | 0.7 | 7  | 1.14  | 0.8 | 6    | 4.84 | 4.5 | 6  |
| 45657702 | peptidyl-prolyl cis-trans isomerase                         | 1.11 | 0.2 | 6  | 1.27 | 0.3 | 6  | 1.50 | 0.5 | 6  | 1.14 | 0.2 | 7  | 1.26  | 0.2 | 6    | 1.17 | 0.2 | 6  |
| 45657707 | hypothetical protein LIC11844                               | 1.32 | 0.8 | 5  | 2.41 | 2.3 | 6  | 6.75 | 2.9 | 7  | 1.35 | 0.7 | 6  | 3.42  | 1.6 | 5    | 2.89 | 1.0 | 7  |
| 45657708 | hypothetical protein LIC11845                               | 1.24 | 0.2 | 11 | 1.32 | 0.2 | 13 | 3.85 | 1.3 | 11 | 0.98 | 0.5 | 14 | 2.88  | 2.0 | 12   | 3.51 | 1.3 | 13 |
| 45657711 | hypothetical protein LIC11848                               | 0.99 | 0.2 | 20 | 0.56 | 0.2 | 20 | 3.41 | 1.2 | 19 | 0.53 | 0.1 | 18 | 3.45  | 1.5 | 21   | 5.48 | 2.0 | 20 |
| 45657714 | cytoplasmic membrane protein                                |      |     |    |      |     |    |      |     |    | 0.72 | 0.4 | 2  | 3.05  | 0.1 | 2    | 4.97 | 2.6 | 2  |
| 45657715 | O-acetylhomoserine (thiol) lyase                            | 1.12 | 0.3 | 7  | 1.90 | 1.7 | 7  | 0.58 | 0.3 | 6  | 1.30 | 0.9 | 8  | 0.65  | 0.3 | 7    | 0.61 | 0.4 | 8  |
| 45657727 | UDP-N-acetylglucosamine:LPS N-acetylglucosamine transferase |      |     |    |      |     |    |      |     |    | 1.23 | 1.4 | 2  | 1.28  | 0.7 | 3    | 1.57 | 1.4 | 2  |
| 45657734 | chemotaxis protein methyltransferase                        | 1.23 | 0.3 | 4  | 1.35 | 0.7 | 4  | 1.24 | 0.2 | 4  | 0.95 | 0.5 | 4  | 1.02  | 0.4 | 4    | 1.44 | 0.7 | 3  |
| 45657748 | putative lipoprotein                                        | 1.09 | 0.1 | 23 | 1.16 | 0.3 | 24 | 1.68 | 1.0 | 25 | 1.05 | 0.3 | 24 | 1.52  | 0.5 | 25   | 1.44 | 0.7 | 24 |
| 45657752 | flagellin protein                                           | 1.04 | 0.1 | 11 | 0.78 | 0.2 | 10 | 3.46 | 0.9 | 11 | 0.74 | 0.1 | 10 | 3.43  | 0.7 | 11   | 5.18 | 1.7 | 10 |
| 45657753 | flagellin protein                                           | 1.17 | 0.1 | 8  | 0.89 | 0.1 | 9  | 4.63 | 0.6 | 8  | 0.80 | 0.1 | 10 | 4.03  | 0.6 | 8    | 4.87 | 1.3 | 10 |
| 45657760 | pyruvate dehydrogenase alpha2 subunit protein               | 1.15 | 0.2 | 4  | 1.03 | 0.1 | 4  | 0.54 | 0.4 | 3  | 0.93 | 0.2 | 4  | 0.47  | 0.3 | 3    | 0.48 | 0.3 | 3  |
| 45657761 | dihydroliipoamide acetyltransferase                         | 0.95 | 0.3 | 6  | 1.43 | 0.3 | 6  | 1.04 | 0.3 | 6  | 1.43 | 0.4 | 5  | 1.17  | 0.1 | 5    | 0.73 | 0.2 | 6  |
| 45657773 | lysyl-tRNA synthetase                                       |      |     |    |      |     |    |      |     |    |      |     |    |       |     |      | 0.54 | 0.1 | 2  |
| 45657774 | udp-n-acetyl-d-mannosamine transferase                      |      |     |    |      |     |    |      |     |    |      |     |    |       |     |      | 0.53 | 0.2 | 2  |
| 45657779 | IMP dehydrogenase                                           | 1.04 | 0.5 | 5  | 1.02 | 0.3 | 5  | 1.44 | 0.6 | 5  | 1.09 | 0.1 | 4  | 1.39  | 0.1 | 5    | 1.30 | 0.1 | 4  |
| 45657788 | FAD-binding oxidoreductase                                  | 1.09 | 0.4 | 2  | 2.23 | 1.5 | 2  | 1.54 | 0.4 | 2  | 2.44 | 2.3 | 2  | 1.58  | 0.9 | 2    | 0.82 | 0.4 | 2  |
| 45657789 | short-chain dehydrogenase                                   | 0.95 | 0.4 | 5  | 0.96 | 0.4 | 6  | 1.10 | 0.1 | 5  | 0.90 | 0.3 | 6  | 0.90  | 0.2 | 5    | 1.20 | 0.4 | 6  |
| 45657794 | hypothetical protein LIC11935                               |      |     |    |      |     |    |      |     |    |      |     |    | 16.60 | 2.1 | 2    |      |     |    |
| 45657799 | heavy metal efflux pump                                     | 0.62 | 0.4 | 5  | 0.75 | 0.1 | 4  | 0.58 | 0.3 | 3  | 2.92 | 3.2 | 4  | 1.32  | 1.0 | 3    | 0.53 | 0.3 | 3  |
| 45657803 | translocase                                                 | 1.26 | 0.2 | 15 | 0.90 | 0.3 | 16 | 0.44 | 0.1 | 13 | 0.72 | 0.2 | 16 | 0.34  | 0.1 | 13   | 0.49 | 0.1 | 14 |
| 45657805 | hypothetical protein LIC11946                               | 0.89 | 0.5 | 2  | 2.58 | 1.1 | 2  |      |     |    |      |     |    |       |     |      |      |     |    |
| 45657810 | ATP-dependent CLP protease-like, proteolytic subunit        | 0.91 | 0.1 | 15 | 1.08 | 0.2 | 14 | 0.42 | 0.2 | 16 | 1.35 | 0.3 | 18 | 0.48  | 0.2 | 17   | 0.39 | 0.1 | 15 |
| 45657813 | enolase                                                     | 1.04 | 0.3 | 14 | 2.25 | 1.8 | 15 | 1.81 | 1.7 | 12 | 2.32 | 2.6 | 14 | 2.01  | 2.8 | 12   | 0.72 | 0.2 | 11 |
| 45657814 | hypothetical protein LIC11955                               | 1.04 | 0.3 | 2  | 0.17 | 0.0 | 2  | 0.75 | 0.3 | 2  | 0.17 | 0.1 | 2  | 0.79  | 0.5 | 2    | 4.30 | 1.4 | 2  |
| 45657816 | response regulator                                          | 0.66 | 0.4 | 4  | 1.26 | 0.9 | 3  | 1.09 | 0.1 | 2  | 2.06 | 0.3 | 3  | 1.57  | 0.7 | 2    | 0.83 | 0.5 | 2  |
| 45657822 | hypothetical protein LIC11966                               | 1.08 | 0.4 | 13 | 0.54 | 0.1 | 11 | 1.13 | 0.6 | 13 | 0.68 | 0.2 | 12 | 0.96  | 0.3 | 13   | 1.53 | 0.5 | 13 |
| 45657829 | acyl-CoA dehydrogenase                                      | 0.87 | 0.2 | 7  | 0.80 | 0.2 | 7  | 0.53 | 0.1 | 5  | 0.95 | 0.3 | 6  | 0.71  | 0.2 | 5    | 0.61 | 0.2 | 6  |
| 45657830 | cyclic nucleotide binding protein                           | 0.88 | 0.1 | 15 | 0.95 | 0.4 | 20 | 0.53 | 0.3 | 15 | 1.10 | 0.7 | 18 | 0.56  | 0.2 | 13   | 0.56 | 0.2 | 16 |
| 45657831 | thioredoxin                                                 |      |     |    |      |     |    |      |     |    |      |     |    | 4.44  | 6.0 | 2    |      |     |    |
| 45657835 | hypothetical protein LIC11982                               | 1.85 | 0.8 | 4  | 1.94 | 1.0 | 4  | 3.91 | 2.4 | 4  | 1.18 | 0.6 | 4  | 2.29  | 1.3 | 4    | 2.11 | 1.4 | 4  |
| 45657838 | RNA-binding protein                                         | 0.65 | 0.0 | 7  | 0.52 | 0.2 | 7  | 0.04 | 0.0 | 6  | 0.84 | 0.2 | 7  | 0.06  | 0.0 | 5    | 0.08 | 0.0 | 5  |
| 45657841 | hypothetical protein LIC11988                               |      |     |    |      |     |    |      |     |    | 0.97 | 0.1 | 2  | 1.56  | 0.1 | 2    | 1.60 | 0.0 | 2  |
| 45657845 | D-3-phosphoglycerate dehydrogenase                          | 0.99 | 0.4 | 4  | 1.56 | 1.7 | 3  | 1.90 | 1.8 | 2  | 1.27 | 0.9 | 3  | 1.43  | 1.0 | 2    | 0.88 | 0.1 | 2  |
| 45657855 | succinate dehydrogenase                                     | 1.14 | 0.2 | 18 | 1.59 | 0.4 | 19 | 2.32 | 0.6 | 17 | 1.61 | 0.6 | 21 | 1.99  | 0.4 | 16   | 1.35 | 0.3 | 16 |
| 45657856 | succinate dehydrogenase                                     | 0.94 | 0.2 | 5  | 2.09 | 0.4 | 4  | 2.62 | 1.0 | 6  | 1.85 | 0.6 | 4  | 2.55  | 0.8 | 6    | 1.64 | 0.5 | 5  |
| 45657861 | hypothetical protein LIC12008                               | 1.00 | 0.2 | 4  | 1.29 | 1.1 | 4  | 2.09 | 0.8 | 5  | 1.98 | 2.4 | 4  | 1.81  | 0.4 | 4    | 3.39 | 2.7 | 3  |
| 45657863 | GTP-binding protein LepA                                    | 1.03 | 0.1 | 3  | 0.87 | 0.1 | 3  |      |     |    | 1.42 | 1.1 | 4  |       |     |      |      |     |    |
| 45657869 | ATP-dependent protease                                      | 1.22 | 0.2 | 13 | 0.72 | 0.2 | 14 | 2.43 | 1.5 | 15 | 0.62 | 0.1 | 13 | 1.62  | 1.0 | 14   | 2.80 | 1.9 | 17 |
| 45657874 | hypothetical protein LIC12022                               | 1.43 | 0.5 | 2  | 0.87 | 0.1 | 2  |      |     |    | 0.66 | 0.3 | 2  |       |     |      |      |     |    |
| 45657877 | asparaginyl-tRNA synthetase                                 | 1.36 | 0.9 | 3  | 1.69 | 1.2 | 4  |      |     |    | 1.28 | 0.3 | 4  |       |     |      |      |     |    |
| 45657879 | hypothetical protein LIC12027                               | 1.99 | 1.4 | 3  | 1.20 | 0.9 | 3  |      |     |    | 0.60 | 0.2 | 3  |       |     |      |      |     |    |
| 45657883 | histidine kinase sensor protein                             | 1.09 | 0.2 | 3  | 0.72 | 0.2 | 3  | 1.33 | 0.5 | 2  | 0.71 | 0.4 | 3  | 1.40  | 0.9 | 2    | 1.64 | 0.2 | 2  |

|          |                                                                               |       |      |    |       |      |    |      |     |    |      |      |     |      |     |    |       |     |    |
|----------|-------------------------------------------------------------------------------|-------|------|----|-------|------|----|------|-----|----|------|------|-----|------|-----|----|-------|-----|----|
| 45657884 | catalase                                                                      | 0.95  | 0.3  | 15 | 1.24  | 0.4  | 14 | 1.44 | 0.6 | 14 | 1.24 | 0.4  | 13  | 1.61 | 0.7 | 15 | 1.15  | 0.4 | 14 |
| 45657886 | transcriptional regulator (FUR family)<br>histidine kinase response regulator | 0.63  | 0.0  | 2  |       |      |    |      |     |    |      |      |     |      |     |    |       |     |    |
| 45657906 | hybrid protein                                                                | 0.96  | 0.0  | 2  |       |      |    |      |     |    |      |      |     |      |     |    |       |     |    |
| 45657918 | hypothetical protein LIC12070                                                 | 1.09  | 0.2  | 5  | 0.54  | 0.1  | 3  | 0.28 | 0.1 | 2  | 0.50 | 0.0  | 3   | 0.27 | 0.1 | 2  | 0.53  | 0.3 | 2  |
| 45657919 | hypothetical protein LIC12071                                                 | 1.55  | 0.9  | 3  | 1.71  | 1.4  | 3  | 2.70 | 1.9 | 2  | 0.91 | 0.3  | 4   | 1.23 | 0.3 | 3  | 1.43  | 0.4 | 3  |
| 45657923 | hypothetical protein LIC12075                                                 | 1.17  | 0.1  | 7  | 1.06  | 0.2  | 7  | 2.69 | 0.5 | 7  | 0.97 | 0.2  | 7   | 2.81 | 0.6 | 7  | 2.45  | 0.7 | 7  |
| 45657930 | cysteine synthase<br>glyceraldehyde-3-phosphate<br>dehydrogenase              | 0.89  | 0.2  | 18 | 0.90  | 0.5  | 19 | 1.00 | 0.3 | 16 | 0.87 | 0.4  | 18  | 1.13 | 0.4 | 16 | 1.24  | 0.4 | 17 |
| 45657938 | phosphoglycerate kinase                                                       | 0.80  | 0.3  | 8  | 1.24  | 0.2  | 8  | 0.21 | 0.1 | 7  | 1.71 | 0.5  | 8   | 0.24 | 0.2 | 8  | 0.15  | 0.1 | 8  |
| 45657939 | triosephosphate isomerase                                                     | 1.13  | 0.4  | 8  | 0.91  | 0.1  | 7  | 0.43 | 0.1 | 5  | 0.83 | 0.3  | 9   | 1.15 | 1.8 | 6  | 0.50  | 0.1 | 5  |
| 45657942 | arginyl-tRNA synthetase                                                       | 0.75  | 0.2  | 7  | 0.95  | 0.1  | 6  | 0.47 | 0.1 | 5  | 1.49 | 0.1  | 5   | 0.68 | 0.2 | 6  | 0.43  | 0.1 | 5  |
| 45657950 | hypothetical protein LIC12106                                                 | 1.05  | 0.4  | 2  |       |      |    |      |     |    |      |      |     |      |     |    |       |     |    |
| 45657954 | aspartyl-tRNA synthetase                                                      | 1.20  | 0.2  | 2  |       |      |    | 3.80 | 0.8 | 2  |      |      |     | 3.23 | 1.0 | 2  |       |     |    |
| 45657956 | 50S ribosomal protein L9                                                      | 1.23  | 0.2  | 5  | 0.81  | 0.2  | 5  |      |     |    | 0.68 | 0.1  | 4   |      |     |    |       |     |    |
| 45657958 | single-stranded DNA binding protein                                           | 0.84  | 0.1  | 14 | 0.58  | 0.1  | 13 | 0.03 | 0.0 | 3  | 0.69 | 0.1  | 14  | 0.04 | 0.0 | 3  | 0.05  | 0.0 | 3  |
| 45657960 | 30S ribosomal protein S6<br>glucose-1-phosphate<br>thymidyltransferase        | 0.87  | 0.2  | 7  | 0.47  | 0.3  | 7  | 0.09 | 0.0 | 3  | 0.69 | 0.3  | 7   | 0.10 | 0.0 | 3  | 0.13  | 0.0 | 3  |
| 45657961 | dTDP-glucose 4,6-dehydratase<br>dTDP-4-dehydrorhamnose 3,5-<br>epimerase      | 0.59  | 0.1  | 6  | 0.50  | 0.1  | 6  | 0.26 | 0.1 | 3  | 0.95 | 0.2  | 6   | 0.45 | 0.2 | 3  | 0.48  | 0.2 | 3  |
| 45657971 | colanic acid biosynthesis glycosyl-transferase                                | 0.66  | 0.1  | 4  | 0.55  | 0.2  | 4  |      |     |    | 0.84 | 0.3  | 4   |      |     |    |       |     |    |
| 45657972 | UDP-glucose 4-epimerase                                                       | 1.03  | 0.2  | 3  | 1.19  | 1.4  | 4  | 2.02 | 2.1 | 3  | 0.33 | 0.3  | 2   | 0.76 | 0.2 | 2  | 3.38  | 4.1 | 4  |
| 45657974 | putative molybdenum cofactor<br>biosynthesis protein                          | 0.92  | 0.3  | 2  | 0.52  | 0.2  | 2  | 1.18 | 0.5 | 2  | 0.78 | 0.4  | 3   | 1.75 | 0.9 | 3  | 2.33  | 1.3 | 3  |
| 45657986 | UDP-glucose 4-epimerase                                                       |       |      |    |       |      |    |      |     |    | 0.41 | 0.1  | 2   |      |     |    |       |     |    |
| 45657989 | cdp-glucose 4,6-dehydratase                                                   | 1.01  | 0.3  | 3  | 0.86  | 0.2  | 3  |      |     |    | 1.16 | 0.6  | 4   | 1.14 | 0.4 | 2  | 1.02  | 0.4 | 2  |
| 45657999 | D-3-phosphoglycerate dehydrogenase                                            | 0.68  | 0.1  | 4  | 0.62  | 0.3  | 4  | 1.44 | 0.6 | 4  | 0.93 | 0.4  | 4   | 2.09 | 0.7 | 4  | 2.68  | 1.5 | 4  |
| 45658002 | putative molybdenum cofactor<br>biosynthesis protein                          | 0.96  | 0.1  | 4  | 0.79  | 0.2  | 5  | 0.66 | 0.2 | 3  | 0.82 | 0.4  | 6   | 0.72 | 0.3 | 3  | 0.85  | 0.2 | 3  |
| 45658014 | alcohol dehydrogenase                                                         | 1.10  | 0.3  | 8  | 1.01  | 0.5  | 7  | 1.36 | 0.8 | 6  | 0.96 | 0.2  | 7   | 0.98 | 0.2 | 6  | 1.03  | 0.2 | 6  |
| 45658015 | aspartate aminotransferase                                                    | 0.86  | 0.3  | 6  | 1.14  | 0.4  | 7  | 0.39 | 0.2 | 5  | 1.13 | 0.4  | 6   | 0.47 | 0.3 | 5  | 0.35  | 0.2 | 5  |
| 45658017 | sialic acid synthase<br>nucleoside-diphosphate-sugar<br>pyrophosphorylase     | 0.76  | 0.1  | 4  | 0.61  | 0.2  | 5  | 0.26 | 0.2 | 4  | 0.59 | 0.1  | 5   | 0.37 | 0.4 | 4  | 0.38  | 0.3 | 4  |
| 45658018 | putative UDP-N-acetylglucosamine-2-<br>epimerase                              | 1.11  | 0.1  | 7  | 0.70  | 0.3  | 6  | 0.91 | 0.1 | 3  | 0.64 | 0.3  | 6   | 0.94 | 0.4 | 4  | 0.85  | 0.1 | 3  |
| 45658020 | acetyl transferase                                                            | 1.09  | 0.1  | 2  | 0.70  | 0.0  | 2  | 1.51 | 0.1 | 2  | 0.64 | 0.0  | 2   | 1.38 | 0.0 | 2  | 2.16  | 0.1 | 2  |
| 45658021 | UDP-glucose 4-epimerase                                                       | 0.88  | 0.2  | 3  | 0.61  | 0.3  | 3  |      |     |    | 0.70 | 0.2  | 3   |      |     |    |       |     |    |
| 45658023 | hypothetical protein LIC12178                                                 |       |      |    |       |      |    |      |     |    |      | 0.76 | 0.3 | 2    |     |    |       |     |    |
| 45658025 | sugar transferase                                                             | 0.77  | 0.1  | 2  | 0.53  | 0.2  | 2  |      |     |    | 0.68 | 0.1  | 2   |      |     |    |       |     |    |
| 45658027 | methyltransferase                                                             |       |      |    |       |      |    |      |     |    | 1.40 | 0.7  | 2   | 2.91 | 0.5 | 2  | 2.27  | 0.8 | 2  |
| 45658028 | ABC transporter, ATP-binding protein                                          |       |      |    |       |      |    |      |     |    |      |      |     |      |     |    | 2.33  | 0.0 | 2  |
| 45658029 | perosamine synthetase                                                         | 1.45  | 0.3  | 3  | 0.95  | 0.4  | 3  | 1.80 | 0.5 | 3  | 0.69 | 0.4  | 3   | 1.24 | 0.5 | 4  | 2.12  | 1.1 | 3  |
| 45658031 | hypothetical protein LIC12188                                                 | 1.00  | 0.1  | 4  | 1.03  | 0.7  | 2  | 0.51 | 0.2 | 4  | 1.11 | 0.7  | 2   | 0.52 | 0.2 | 4  | 0.45  | 0.0 | 2  |
| 45658036 | hypothetical protein LIC12189                                                 | 0.90  | 0.3  | 3  | 0.68  | 0.1  | 3  | 0.84 | 0.4 | 2  | 0.67 | 0.1  | 2   | 0.93 | 0.0 | 2  |       |     |    |
| 45658037 | hypothetical protein LIC12193                                                 | 0.81  | 0.2  | 8  | 0.79  | 0.3  | 7  | 0.58 | 0.2 | 7  | 0.90 | 0.3  | 7   | 0.55 | 0.3 | 7  | 0.55  | 0.3 | 6  |
| 45658038 | transketolase beta subunit                                                    | 0.86  | 0.2  | 4  | 0.94  | 0.3  | 4  | 0.53 | 0.4 | 4  | 1.18 | 0.6  | 4   | 0.71 | 0.7 | 4  | 0.55  | 0.2 | 4  |
| 45658042 | aminotransferase                                                              | 1.00  | 0.6  | 3  | 1.03  | 0.6  | 4  | 1.32 | 0.9 | 3  | 1.46 | 0.9  | 3   | 1.56 | 1.0 | 3  | 1.05  | 0.2 | 3  |
| 45658043 | aminotransferase                                                              | 0.98  | 0.3  | 5  | 0.99  | 0.6  | 4  | 1.23 | 0.6 | 3  | 0.94 | 0.3  | 4   | 1.45 | 1.1 | 3  | 1.16  | 1.3 | 4  |
| 45658046 | aminotransferase                                                              | 0.67  | 0.2  | 5  | 0.51  | 0.2  | 5  | 0.73 | 0.8 | 5  | 0.81 | 0.4  | 5   | 0.53 | 0.2 | 4  | 0.79  | 0.3 | 5  |
| 45658047 | aminotransferase                                                              | 0.88  | 0.3  | 16 | 0.85  | 0.3  | 16 | 0.89 | 0.3 | 16 | 0.90 | 0.4  | 17  | 0.96 | 0.3 | 15 | 1.14  | 0.4 | 15 |
| 45658048 | UDP-glucose 4-epimerase                                                       | 0.85  | 0.3  | 5  | 1.15  | 0.3  | 7  | 1.36 | 0.8 | 6  | 1.07 | 0.3  | 5   | 1.66 | 0.6 | 6  | 1.15  | 0.5 | 6  |
| 45658049 | ADP-heptose synthetase<br>mannose-1-phosphate<br>guanylyltransferase          | 1.01  | 0.3  | 11 | 0.96  | 0.2  | 9  | 1.26 | 0.5 | 9  | 0.98 | 0.1  | 8   | 1.23 | 0.5 | 9  | 1.27  | 0.3 | 6  |
| 45658050 | UDP-glucose 4-epimerase                                                       | 1.38  | 0.0  | 2  | 1.08  | 0.3  | 2  |      |     |    | 0.78 | 0.2  | 2   |      |     |    |       |     |    |
| 45658051 | gdp-l-fucose synthetase                                                       | 1.09  | 0.2  | 7  | 0.87  | 0.2  | 9  | 0.46 | 0.3 | 9  | 0.89 | 0.2  | 8   | 0.38 | 0.1 | 8  | 0.54  | 0.3 | 9  |
| 45658054 | hypothetical protein LIC12207                                                 | 1.75  | 0.9  | 3  |       |      |    | 3.27 | 2.4 | 3  |      |      |     | 1.64 | 0.7 | 3  |       |     |    |
| 45658056 | Hsp15-like protein                                                            | 1.02  | 0.4  | 7  | 0.57  | 0.2  | 7  | 0.26 | 0.1 | 4  | 0.70 | 0.4  | 6   | 0.26 | 0.1 | 4  | 0.46  | 0.2 | 5  |
| 45658059 | Hsp15                                                                         | 43.36 | 20.5 | 3  | 51.80 | 24.4 | 3  |      |     |    | 1.27 | 0.2  | 9   | 0.01 | 0.0 | 2  | 0.01  | 0.0 | 2  |
| 45658060 | putative lipoprotein                                                          | 9.67  | 14.5 | 3  |       |      |    | 3.00 | 3.0 | 3  | 1.18 | 0.7  | 11  | 0.72 | 0.4 | 3  | 5.69  | 7.3 | 3  |
| 45658066 | hypothetical protein LIC12227                                                 | 1.22  | 0.6  | 4  | 1.67  | 0.9  | 4  | 1.93 | 0.6 | 3  | 1.32 | 0.3  | 4   | 1.72 | 0.6 | 4  | 1.03  | 0.3 | 4  |
| 45658076 | hypothetical protein LIC12231                                                 | 0.05  | 0.0  | 2  |       |      |    |      |     |    |      |      |     |      |     |    |       |     |    |
| 45658080 | thymidylate synthase                                                          | 1.04  | 0.1  | 2  | 0.96  | 0.1  | 2  | 1.49 | 0.2 | 2  | 0.92 | 0.1  | 2   | 1.43 | 0.1 | 2  | 1.55  | 0.0 | 2  |
| 45658081 | fructose-bisphosphate aldolase                                                |       |      |    | 3.25  | 3.4  | 2  | 3.32 | 4.0 | 2  |      |      |     |      |     |    | 0.84  | 0.4 | 2  |
| 45658082 | chemotaxis protein                                                            | 0.88  | 0.2  | 8  | 1.07  | 0.4  | 9  | 0.81 | 0.4 | 9  | 1.16 | 0.5  | 8   | 0.87 | 0.5 | 8  | 0.88  | 0.3 | 8  |
| 45658089 | host factor-1                                                                 | 1.17  | 0.3  | 3  | 1.68  | 0.6  | 3  | 1.39 | 0.7 | 3  | 1.42 | 0.2  | 3   | 1.16 | 0.4 | 3  | 0.79  | 0.2 | 3  |
| 45658094 | hypothetical protein LIC12247                                                 | 0.80  | 0.3  | 8  | 0.17  | 0.1  | 5  | 2.08 | 0.7 | 8  | 0.23 | 0.1  | 5   | 2.45 | 0.4 | 7  | 11.94 | 2.6 | 5  |
| 45658096 | carboxy-terminal processing protease                                          | 0.86  | 0.3  | 2  |       |      |    |      |     |    |      |      |     |      |     |    |       |     |    |
| 45658099 | hypothetical protein LIC12263                                                 | 0.68  | 0.2  | 23 | 1.05  | 0.3  | 21 | 0.30 | 0.1 | 19 | 1.71 | 0.7  | 23  | 0.53 | 0.4 | 19 | 0.34  | 0.3 | 20 |
| 45658112 |                                                                               | 0.92  | 0.3  | 6  | 0.57  | 0.1  | 4  | 0.84 | 0.3 | 5  | 0.79 | 0.3  | 6   | 1.26 | 0.4 | 6  | 1.54  | 0.1 | 6  |



|          |                                                                                                                   |      |     |    |      |     |    |       |      |    |      |     |    |      |      |    |      |       |      |   |
|----------|-------------------------------------------------------------------------------------------------------------------|------|-----|----|------|-----|----|-------|------|----|------|-----|----|------|------|----|------|-------|------|---|
| 45658122 | GGDEF family protein                                                                                              | 0.69 | 0.3 | 2  | 0.50 | 0.1 | 2  | 1.59  | 0.3  | 2  | 0.74 | 0.1 | 2  | 2.64 | 1.6  | 2  | 3.42 | 1.6   | 2    |   |
| 45658125 | hypothetical protein LIC12277                                                                                     | 0.90 | 0.5 | 2  | 0.75 | 0.4 | 2  | 0.49  | 0.3  | 2  | 0.86 | 0.1 | 2  | 0.53 | 0.0  | 2  | 0.62 | 0.1   | 2    |   |
| 45658127 | haloacid dehalogenase-like hydrolase                                                                              |      |     |    |      |     |    |       |      |    | 1.57 | 0.0 | 2  | 0.90 | 0.6  | 2  | 0.58 | 0.4   | 2    |   |
| 45658133 | H+-translocating pyrophosphatase                                                                                  | 1.08 | 0.2 | 5  | 1.39 | 0.3 | 5  | 1.69  | 0.5  | 5  | 0.96 | 0.3 | 7  | 1.22 | 0.8  | 7  | 1.01 | 0.5   | 6    |   |
| 45658135 | putative lipoprotein                                                                                              | 1.22 | 0.2 | 5  | 0.71 | 0.1 | 4  | 0.16  | 0.1  | 5  | 0.54 | 0.1 | 5  | 0.16 | 0.0  | 4  | 0.30 | 0.1   | 4    |   |
| 45658142 | udp-glucose dehydrogenase                                                                                         | 1.24 | 0.2 | 5  | 0.90 | 0.1 | 5  | 1.26  | 0.5  | 4  | 0.63 | 0.2 | 7  | 1.46 | 0.3  | 4  | 1.24 | 0.6   | 5    |   |
| 45658165 | beta-ketoacyl synthase                                                                                            |      |     |    | 1.16 | 0.5 | 3  | 11.17 | 6.1  | 3  | 0.59 | 0.1 | 2  | 8.66 | 7.8  | 2  | 9.55 | 2.1   | 4    |   |
| 45658166 | hypothetical protein LIC12318<br>3-oxoacyl-[acyl-carrier protein]<br>reductase                                    |      |     |    |      |     |    | 1.38  | 0.9  | 2  |      |     |    | 1.38 | 0.8  | 2  |      | 14.95 | 18.7 | 2 |
| 45658168 | type III beta-ketoacyl synthase-like<br>protein                                                                   | 0.98 | 0.1 | 2  |      |     |    |       |      |    |      |     |    |      |      |    |      |       |      |   |
| 45658171 | serine/threonine kinase with GAF<br>domain                                                                        | 0.86 | 0.4 | 4  | 1.22 | 0.2 | 5  | 1.99  | 0.7  | 5  | 1.58 | 0.5 | 4  | 2.95 | 1.6  | 4  | 1.97 | 1.0   | 6    |   |
| 45658172 | hypothetical protein LIC12325                                                                                     | 1.40 | 0.3 | 13 | 1.03 | 0.2 | 12 | 1.78  | 1.0  | 13 | 0.73 | 0.2 | 14 | 1.32 | 0.8  | 15 | 2.11 | 1.1   | 15   |   |
| 45658173 | adenylate/guanylate cyclase                                                                                       | 1.42 | 0.7 | 2  | 0.81 | 0.3 | 2  | 4.10  | 2.1  | 2  | 0.59 | 0.1 | 2  | 2.84 | 0.2  | 2  | 4.92 | 0.9   | 2    |   |
| 45658176 | putative lactoylglutathione lyase                                                                                 | 0.56 | 0.2 | 4  | 0.77 | 0.2 | 4  |       |      |    | 1.37 | 0.2 | 4  |      |      |    |      |       |      |   |
| 45658181 | serine hydroxymethyltransferase                                                                                   | 0.92 | 0.2 | 7  | 1.11 | 0.6 | 7  | 1.37  | 2.1  | 4  | 1.29 | 0.3 | 6  | 2.39 | 3.9  | 4  | 0.48 | 0.3   | 4    |   |
| 45658187 | hypothetical protein LIC12341                                                                                     | 0.77 | 0.1 | 2  | 0.51 | 0.3 | 2  |       |      |    | 0.70 | 0.5 | 2  |      |      |    |      |       |      |   |
| 45658192 | ribokinase                                                                                                        | 0.99 | 0.2 | 2  | 0.38 | 0.4 | 2  |       |      |    | 0.43 | 0.5 | 2  |      |      |    |      |       |      |   |
| 45658195 | hypothetical protein LIC12349                                                                                     | 1.30 | 0.2 | 2  | 0.93 | 0.1 | 2  |       |      |    | 0.72 | 0.0 | 2  |      |      |    |      |       |      |   |
| 45658196 | glycyl-tRNA synthetase                                                                                            | 0.94 | 0.5 | 3  | 1.32 | 0.6 | 3  |       |      |    | 1.56 | 0.8 | 3  |      |      |    |      |       |      |   |
| 45658203 | elongation factor EF-G                                                                                            | 0.90 | 0.2 | 7  | 0.60 | 0.4 | 7  | 0.37  | 0.1  | 4  | 0.74 | 0.5 | 7  | 0.47 | 0.1  | 4  | 0.55 | 0.2   | 4    |   |
| 45658214 | hypothetical protein LIC12368                                                                                     | 1.24 | 1.0 | 4  | 2.84 | 2.1 | 4  | 1.48  | 0.7  | 4  | 2.36 | 0.5 | 4  | 1.55 | 1.0  | 4  | 0.63 | 0.3   | 4    |   |
| 45658225 | histidine kinase sensor protein                                                                                   | 1.55 | 0.3 | 4  | 0.84 | 0.5 | 4  | 4.03  | 0.4  | 4  | 0.57 | 0.3 | 5  | 2.44 | 0.7  | 5  | 3.75 | 1.7   | 5    |   |
| 45658243 | hypothetical protein LIC12397                                                                                     | 1.04 | 0.3 | 7  | 1.04 | 0.3 | 7  | 0.63  | 0.2  | 5  | 1.09 | 0.2 | 7  | 0.57 | 0.2  | 6  | 0.42 | 0.1   | 4    |   |
| 45658245 | hypothetical protein LIC12399                                                                                     | 1.19 | 0.4 | 3  | 1.37 | 0.5 | 3  | 2.35  | 0.0  | 3  | 1.30 | 0.8 | 3  | 2.13 | 0.6  | 3  | 1.86 | 0.6   | 3    |   |
| 45658246 | isoleucyl-tRNA synthetase                                                                                         | 1.04 | 0.3 | 9  | 0.74 | 0.2 | 9  | 0.59  | 0.4  | 4  | 0.84 | 0.2 | 8  | 0.50 | 0.2  | 4  | 0.92 | 0.9   | 4    |   |
| 45658248 | phosphoribosylformylglycinamide<br>synthetase                                                                     | 1.00 | 0.4 | 4  | 0.90 | 0.5 | 3  | 0.85  | 0.1  | 2  | 0.93 | 0.5 | 3  | 0.91 | 0.4  | 2  | 1.40 | 0.2   | 2    |   |
| 45658253 | putative glutamine synthetase protein                                                                             | 0.92 | 0.3 | 19 | 1.10 | 0.3 | 20 | 1.07  | 0.4  | 20 | 1.01 | 0.3 | 20 | 1.07 | 0.5  | 20 | 1.01 | 0.3   | 20   |   |
| 45658259 | hypothetical protein LIC12414                                                                                     | 1.48 | 0.9 | 6  | 0.21 | 0.2 | 2  | 2.92  | 2.0  | 7  | 0.16 | 0.1 | 2  | 2.17 | 1.6  | 7  | 2.80 | 0.6   | 2    |   |
| 45658266 | hypothetical protein LIC12421                                                                                     | 0.92 | 0.3 | 3  | 0.82 | 0.1 | 3  | 0.67  | 0.6  | 2  | 0.92 | 0.2 | 3  | 0.61 | 0.4  | 2  | 0.74 | 0.6   | 2    |   |
| 45658267 | aspartate aminotransferase a                                                                                      | 0.97 | 0.2 | 3  | 0.76 | 0.1 | 4  | 0.86  | 0.3  | 4  | 0.78 | 0.1 | 3  | 0.76 | 0.3  | 3  | 1.11 | 0.4   | 4    |   |
| 45658283 | transcriptional regulator                                                                                         | 0.89 | 0.2 | 7  | 0.29 | 0.1 | 5  | 0.27  | 0.1  | 6  | 0.47 | 0.1 | 5  | 0.29 | 0.2  | 6  | 0.84 | 0.5   | 4    |   |
| 45658290 | hypothetical protein LIC12446                                                                                     | 0.78 | 0.1 | 7  | 0.97 | 0.1 | 6  | 0.68  | 0.2  | 6  | 1.17 | 0.3 | 6  | 0.90 | 0.1  | 5  | 0.71 | 0.2   | 4    |   |
| 45658291 | 30S ribosomal protein S1                                                                                          | 1.02 | 0.5 | 21 | 0.86 | 0.5 | 20 | 0.21  | 0.1  | 9  | 0.87 | 0.3 | 20 | 0.24 | 0.1  | 9  | 0.30 | 0.2   | 9    |   |
| 45658297 | response regulator                                                                                                | 0.57 | 0.1 | 8  | 0.93 | 0.1 | 9  | 0.22  | 0.1  | 7  | 1.70 | 0.6 | 9  | 0.41 | 0.1  | 7  | 0.21 | 0.1   | 6    |   |
| 45658299 | chemotaxis protein                                                                                                |      |     |    |      |     |    |       |      |    | 1.83 | 0.7 | 4  | 4.24 | 1.8  | 4  | 2.28 | 0.3   | 4    |   |
| 45658302 | hypothetical protein LIC12460                                                                                     | 1.04 | 0.2 | 8  | 0.78 | 0.2 | 8  | 2.32  | 0.2  | 7  | 0.78 | 0.1 | 7  | 1.98 | 0.7  | 8  | 2.74 | 1.0   | 8    |   |
| 45658304 | 50S ribosomal protein L35                                                                                         | 0.68 | 0.0 | 2  | 0.06 | 0.0 | 2  |       |      |    | 0.09 | 0.0 | 2  |      |      |    |      |       |      |   |
| 45658305 | translation initiation factor protein                                                                             | 1.81 | 0.7 | 4  | 1.09 | 0.5 | 4  | 1.60  | 1.1  | 3  | 0.68 | 0.4 | 4  | 0.72 | 0.4  | 3  | 1.97 | 1.7   | 3    |   |
| 45658307 | threonyl-tRNA synthetase                                                                                          | 0.95 | 0.2 | 10 | 0.94 | 0.4 | 10 | 0.30  | 0.2  | 8  | 1.04 | 0.3 | 10 | 0.37 | 0.2  | 9  | 0.39 | 0.2   | 10   |   |
| 45658308 | carbamoyl-phosphate synthase small<br>subunit                                                                     | 1.55 | 0.5 | 2  | 1.75 | 1.2 | 2  |       |      |    | 1.05 | 0.4 | 2  |      |      |    |      |       |      |   |
| 45658316 | oxoglutarate dehydrogenase                                                                                        | 1.22 | 0.3 | 14 | 0.64 | 0.1 | 16 | 1.35  | 0.6  | 16 | 0.52 | 0.1 | 15 | 1.04 | 0.5  | 15 | 2.10 | 0.9   | 16   |   |
| 45658317 | dihydrolipoamide dehydrogenase                                                                                    | 1.25 | 0.4 | 7  | 0.83 | 0.1 | 6  | 0.90  | 0.3  | 7  | 0.67 | 0.1 | 6  | 0.66 | 0.1  | 6  | 0.96 | 0.1   | 6    |   |
| 45658318 | dihydrolipoamide succinyltransferase                                                                              | 1.47 | 0.4 | 9  | 1.05 | 0.5 | 7  | 2.32  | 1.8  | 7  | 0.69 | 0.1 | 7  | 1.89 | 1.3  | 8  | 2.61 | 2.4   | 6    |   |
| 45658319 | Bbp1A                                                                                                             | 1.84 | 0.5 | 4  | 1.80 | 0.9 | 5  | 2.62  | 2.2  | 6  | 0.78 | 0.2 | 4  | 0.64 | 0.3  | 4  | 1.10 | 0.5   | 6    |   |
| 45658326 | DNA binding protein                                                                                               | 1.14 | 0.4 | 3  | 0.91 | 0.3 | 3  | 1.99  | 1.4  | 3  | 0.81 | 0.2 | 3  | 1.73 | 0.9  | 3  | 2.32 | 1.4   | 3    |   |
| 45658329 | hypothetical protein LIC12487                                                                                     | 1.56 | 0.2 | 2  | 0.84 | 0.5 | 2  | 0.85  | 0.2  | 2  | 0.52 | 0.3 | 2  | 0.54 | 0.0  | 2  | 1.19 | 0.6   | 2    |   |
| 45658331 | hypothetical protein LIC12489                                                                                     | 0.37 | 0.0 | 4  | 0.42 | 0.2 | 3  |       |      |    | 1.12 | 0.5 | 3  |      |      |    |      |       |      |   |
| 45658337 | 3-hydroxybutyryl-CoA dehydratase                                                                                  | 0.74 | 0.1 | 7  | 0.79 | 0.1 | 7  | 0.19  | 0.0  | 6  | 1.22 | 0.3 | 8  | 0.23 | 0.0  | 5  | 0.23 | 0.1   | 6    |   |
| 45658368 | ABC transporter, ATP-binding protein<br>sulfate ABC transporter periplasmic<br>sulphate-binding protein precursor | 1.62 | 0.5 | 2  | 0.90 | 0.1 | 2  | 1.20  | 0.4  | 2  | 0.59 | 0.2 | 2  | 0.74 | 0.0  | 2  | 1.36 | 0.5   | 2    |   |
| 45658371 | GTP cyclohydrolase 2                                                                                              | 1.45 | 0.1 | 2  | 0.65 | 0.3 | 2  | 1.79  | 1.5  | 2  | 0.45 | 0.2 | 2  | 1.26 | 1.1  | 2  | 2.47 | 1.3   | 2    |   |
| 45658376 | GTP cyclohydrolase 2                                                                                              | 1.09 | 0.2 | 2  | 0.94 | 0.0 | 2  |       |      |    | 0.88 | 0.2 | 2  |      |      |    |      |       |      |   |
| 45658380 | SecD                                                                                                              | 1.27 | 0.5 | 20 | 1.24 | 0.3 | 19 | 2.61  | 1.2  | 20 | 1.00 | 0.3 | 19 | 2.09 | 0.9  | 20 | 2.20 | 0.6   | 20   |   |
| 45658382 | YajC                                                                                                              | 1.36 | 0.2 | 6  | 2.10 | 0.7 | 6  | 8.91  | 13.3 | 6  | 1.82 | 0.6 | 5  | 9.95 | 10.6 | 6  | 1.71 | 0.7   | 6    |   |
| 45658383 | anthranilate phosphoribosyl<br>transferase                                                                        | 0.83 | 0.1 | 2  | 0.82 | 0.1 | 2  | 0.47  | 0.1  | 2  | 0.99 | 0.0 | 2  | 0.57 | 0.0  | 2  | 0.58 | 0.0   | 2    |   |
| 45658384 | phosphatidylglycerophosphate synthase                                                                             |      |     |    |      |     |    |       |      |    |      |     |    | 3.59 | 3.7  | 2  |      |       |      |   |
| 45658385 | hypothetical protein LIC12543                                                                                     |      |     |    |      |     |    |       |      |    |      |     |    | 1.74 | 1.0  | 2  |      |       |      |   |
| 45658386 | DNA binding protein                                                                                               | 1.50 | 0.5 | 9  | 1.58 | 0.5 | 9  | 1.24  | 0.5  | 10 | 1.09 | 0.3 | 12 | 1.02 | 0.7  | 12 | 0.87 | 0.4   | 12   |   |
| 45658387 | outer membrane lipoprotein carrier<br>protein                                                                     | 0.92 | 0.4 | 4  | 1.34 | 0.6 | 3  | 0.59  | 0.4  | 3  | 1.39 | 0.2 | 3  | 0.69 | 0.6  | 3  | 0.30 | 0.2   | 2    |   |
| 45658392 | acyl-CoA dehydrogenase                                                                                            | 0.77 | 0.1 | 2  | 1.04 | 0.0 | 2  | 0.61  | 0.1  | 2  |      |     |    | 0.79 | 0.1  | 2  |      |       |      |   |
| 45658404 | glycerol-3-phosphate dehydrogenase                                                                                | 1.03 | 0.3 | 9  | 0.95 | 0.3 | 7  | 0.45  | 0.3  | 6  | 0.77 | 0.3 | 8  | 0.39 | 0.1  | 6  | 0.62 | 0.5   | 5    |   |

|          |                                                                                |      |     |    |        |       |    |      |     |    |        |       |    |      |     |    |      |      |    |
|----------|--------------------------------------------------------------------------------|------|-----|----|--------|-------|----|------|-----|----|--------|-------|----|------|-----|----|------|------|----|
| 45658406 | adenylsuccinate synthetase                                                     | 0.87 | 0.3 | 6  | 0.81   | 0.3   | 6  | 0.51 | 0.4 | 4  | 0.81   | 0.2   | 5  | 0.56 | 0.4 | 4  | 0.51 | 0.2  | 4  |
| 45658407 | hypothetical protein LIC12568                                                  | 1.04 | 0.3 | 4  | 1.05   | 0.5   | 4  | 0.71 | 0.2 | 4  | 1.01   | 0.3   | 4  | 0.70 | 0.2 | 4  | 0.70 | 0.1  | 4  |
| 45658411 | succinyl-CoA synthetase beta subunit                                           | 0.81 | 0.1 | 20 | 0.93   | 0.3   | 24 | 0.12 | 0.0 | 17 | 1.26   | 0.3   | 22 | 0.16 | 0.0 | 16 | 0.12 | 0.0  | 17 |
| 45658412 | succinyl-CoA synthetase alpha subunit                                          | 0.81 | 0.2 | 14 | 2.15   | 3.8   | 14 | 0.14 | 0.1 | 6  | 1.75   | 1.5   | 14 | 0.18 | 0.1 | 6  | 0.14 | 0.1  | 6  |
| 45658413 | cytoplasmic membrane protein                                                   | 1.00 | 0.2 | 9  | 1.07   | 0.1   | 7  | 1.85 | 0.3 | 8  | 1.04   | 0.1   | 8  | 1.74 | 0.2 | 7  | 1.58 | 0.4  | 8  |
| 45658414 | hypothetical protein LIC12576                                                  | 1.32 | 0.1 | 2  | 0.82   | 0.3   | 2  |      |     |    | 0.63   | 0.3   | 2  |      |     |    |      |      |    |
| 45658429 | aminopeptidase N                                                               | 0.95 | 0.2 | 6  | 0.63   | 0.2   | 6  | 0.35 | 0.1 | 4  | 0.81   | 0.4   | 6  | 0.37 | 0.1 | 4  | 0.47 | 0.2  | 4  |
| 45658437 | hypothetical protein LIC12600                                                  |      |     |    | 47.01  | 66.1  | 2  |      |     |    | 0.34   | 0.0   | 2  |      |     |    |      |      |    |
| 45658438 | hypothetical protein LIC12601                                                  | 1.99 | 1.8 | 2  | 5.01   | 0.4   | 2  |      |     |    | 4.16   | 3.6   | 2  |      |     |    |      |      |    |
| 45658440 | hypothetical protein LIC12603                                                  |      |     |    |        |       |    |      |     |    | 100.87 | 134.0 | 2  | 4.05 | 5.2 | 2  | 0.05 | 0.0  | 2  |
| 45658447 | hypothetical protein LIC12610                                                  | 1.16 | 0.2 | 2  | 6.18   | 1.7   | 2  | 0.62 | 0.2 | 2  | 5.57   | 2.5   | 2  | 0.53 | 0.1 | 2  | 0.11 | 0.1  | 2  |
| 45658448 | hypothetical protein LIC12611                                                  | 1.34 | 0.3 | 3  | 1.31   | 1.7   | 3  | 0.32 | 0.1 | 2  | 0.86   | 1.0   | 3  | 0.27 | 0.1 | 2  | 1.04 | 0.5  | 4  |
| 45658451 | hypothetical protein LIC12614                                                  |      |     |    | 728.13 | 247.3 | 2  |      |     |    |        |       |    |      |     |    | 0.00 | 0.0  | 2  |
| 45658452 | hypothetical protein LIC12615                                                  | 1.25 | 0.3 | 6  | 403.47 | 211.4 | 9  | 3.87 | 1.0 | 8  | 408.39 | 271.3 | 10 | 4.20 | 0.8 | 9  | 0.01 | 0.0  | 13 |
| 45658455 | diaminopimelate decarboxylase                                                  | 0.82 | 0.3 | 6  | 1.04   | 0.2   | 8  | 0.64 | 0.2 | 4  | 1.15   | 0.3   | 6  | 0.90 | 0.3 | 5  | 0.58 | 0.1  | 4  |
| 45658458 | hypothetical protein LIC12621                                                  | 1.05 | 0.1 | 10 | 1.08   | 0.2   | 10 | 3.49 | 0.7 | 9  | 0.97   | 0.1   | 10 | 3.30 | 0.5 | 9  | 3.28 | 0.6  | 10 |
| 45658464 | histidine kinase response regulator hybrid protein                             | 1.20 | 0.3 | 2  | 1.18   | 0.3   | 2  | 2.89 | 0.0 | 2  | 1.05   | 0.5   | 2  | 2.48 | 0.6 | 2  | 2.55 | 0.7  | 2  |
| 45658473 | transcription termination factor Rho                                           | 1.11 | 0.2 | 14 | 0.99   | 0.2   | 14 | 0.43 | 0.3 | 14 | 0.98   | 0.2   | 15 | 0.42 | 0.3 | 13 | 0.37 | 0.3  | 12 |
| 45658515 | thiamine biosynthesis protein ThiC                                             | 0.73 | 0.3 | 4  | 0.59   | 0.2   | 3  | 1.00 | 0.9 | 3  | 1.20   | 1.0   | 3  | 1.53 | 1.2 | 3  | 1.59 | 1.8  | 2  |
| 45658520 | ABC transporter ATP-binding protein                                            | 1.16 | 0.5 | 2  |        |       |    |      |     |    |        |       |    |      |     |    |      |      |    |
| 45658526 | hypothetical protein LIC12691                                                  | 1.37 | 0.5 | 5  | 1.35   | 0.5   | 5  | 0.81 | 0.2 | 4  | 1.06   | 0.1   | 4  | 0.77 | 0.2 | 5  | 0.77 | 0.2  | 5  |
| 45658528 | hypothetical protein LIC12693                                                  | 0.94 | 0.2 | 3  |        |       |    | 2.03 | 1.2 | 3  | 0.98   | 0.3   | 2  | 2.06 | 0.8 | 3  |      |      |    |
| 45658529 | glutamate synthase (NADPH) alpha chain precursor                               | 1.04 | 0.3 | 20 | 0.71   | 0.3   | 19 | 0.70 | 0.4 | 17 | 0.70   | 0.2   | 20 | 0.62 | 0.3 | 17 | 0.89 | 0.4  | 17 |
| 45658536 | polynucleotide phosphorylase                                                   | 1.07 | 0.2 | 21 | 0.92   | 0.4   | 22 | 0.57 | 0.2 | 21 | 0.87   | 0.4   | 21 | 0.53 | 0.2 | 20 | 0.72 | 0.3  | 19 |
| 45658537 | 30S ribosomal protein S15                                                      | 0.80 | 0.2 | 3  | 0.45   | 0.3   | 2  |      |     |    | 0.52   | 0.1   | 2  |      |     |    |      |      |    |
| 45658540 | translation initiation factor IF-2                                             | 0.74 | 0.2 | 8  | 0.87   | 0.1   | 8  | 0.19 | 0.1 | 6  | 1.02   | 0.2   | 8  | 0.28 | 0.2 | 7  | 0.23 | 0.2  | 6  |
| 45658541 | transcription elongation factor NusA                                           | 0.84 | 0.4 | 16 | 0.76   | 0.3   | 16 | 0.32 | 0.2 | 13 | 0.93   | 0.4   | 16 | 0.36 | 0.1 | 14 | 0.38 | 0.1  | 12 |
| 45658559 | 3-hydroxybutyryl-CoA dehydratase                                               | 0.85 | 0.1 | 5  | 0.62   | 0.2   | 4  | 0.60 | 0.4 | 4  | 0.87   | 0.1   | 4  | 0.57 | 0.3 | 4  | 0.69 | 0.2  | 4  |
| 45658564 | hypothetical protein LIC12730 site-specific modification DNA-methyltransferase | 1.56 | 0.5 | 4  | 1.14   | 0.4   | 4  | 1.54 | 0.5 | 2  | 0.75   | 0.2   | 4  | 0.94 | 0.1 | 2  | 1.12 | 0.1  | 3  |
| 45658571 | MaoC family protein                                                            | 1.52 | 0.8 | 4  | 0.70   | 0.5   | 4  | 1.49 | 0.1 | 3  | 0.59   | 0.4   | 5  | 1.20 | 0.5 | 4  | 4.55 | 6.1  | 4  |
| 45658573 | hypothetical protein LIC12740                                                  | 0.72 | 0.1 | 4  | 0.87   | 0.2   | 4  | 0.24 | 0.1 | 4  | 1.21   | 0.3   | 4  | 0.33 | 0.1 | 4  | 0.27 | 0.1  | 4  |
| 45658574 | hypothetical protein LIC12740                                                  | 1.09 | 0.2 | 2  | 0.80   | 0.0   | 2  |      |     |    | 0.75   | 0.1   | 2  |      |     |    |      |      |    |
| 45658577 | NADH dehydrogenase I subunit C                                                 | 1.23 | 0.3 | 2  | 0.99   | 0.2   | 2  | 0.66 | 0.0 | 2  | 0.80   | 0.0   | 2  | 0.56 | 0.2 | 2  | 0.69 | 0.2  | 2  |
| 45658578 | NADH dehydrogenase I D subunit                                                 | 1.41 | 0.4 | 3  |        |       |    |      |     |    |        |       |    |      |     |    |      |      |    |
| 45658580 | NADH dehydrogenase I F subunit                                                 | 0.91 | 0.3 | 5  | 0.62   | 0.2   | 5  | 0.69 | 0.3 | 5  | 0.74   | 0.3   | 5  | 0.81 | 0.4 | 5  | 1.14 | 0.4  | 5  |
| 45658595 | aldehyde dehydrogenase                                                         | 1.19 | 0.1 | 4  | 0.83   | 0.1   | 4  | 0.68 | 0.3 | 4  | 0.71   | 0.1   | 4  | 0.63 | 0.2 | 4  | 0.71 | 0.4  | 4  |
| 45658599 | thiol peroxidase                                                               | 0.59 | 0.2 | 8  | 1.25   | 0.2   | 8  | 0.09 | 0.0 | 6  | 1.49   | 0.9   | 8  | 0.17 | 0.0 | 7  | 0.22 | 0.4  | 6  |
| 45658600 | anti-sigma factor antagonist                                                   | 1.03 | 0.5 | 3  | 1.26   | 0.3   | 3  | 0.48 | 0.2 | 2  | 1.46   | 0.7   | 3  | 0.64 | 0.1 | 2  | 0.35 | 0.0  | 2  |
| 45658604 | gamma-glutamyl phosphate reductase                                             | 0.94 | 0.4 | 4  | 3.72   | 4.8   | 3  | 1.28 | 1.0 | 2  | 3.97   | 4.9   | 4  | 1.55 | 1.5 | 3  | 0.96 | 0.5  | 3  |
| 45658607 | 50S ribosomal protein L27                                                      | 1.13 | 0.3 | 3  | 0.31   | 0.1   | 3  | 0.65 | 0.1 | 2  | 0.27   | 0.0   | 3  | 0.51 | 0.1 | 2  | 1.95 | 0.0  | 2  |
| 45658609 | 50S ribosomal protein L21                                                      | 0.86 | 0.1 | 5  | 0.54   | 0.2   | 6  | 0.06 | 0.0 | 5  | 0.47   | 0.1   | 5  | 0.06 | 0.0 | 5  | 0.13 | 0.0  | 5  |
| 45658626 | acetyl-CoA acetyltransferase                                                   | 0.81 | 0.1 | 9  | 0.77   | 0.2   | 10 | 0.54 | 0.2 | 11 | 1.10   | 0.2   | 8  | 0.76 | 0.2 | 9  | 0.66 | 0.4  | 10 |
| 45658632 | hypothetical protein LIC12801                                                  | 1.15 | 0.4 | 3  | 1.64   | 0.7   | 3  | 3.80 | 0.6 | 3  | 1.43   | 0.4   | 3  | 3.42 | 0.6 | 3  | 2.53 | 0.8  | 3  |
| 45658636 | hypothetical protein LIC12805                                                  | 1.18 | 0.3 | 2  | 1.51   | 0.8   | 2  | 3.97 | 3.7 | 2  | 1.23   | 0.4   | 2  | 3.05 | 2.3 | 2  | 2.31 | 1.2  | 2  |
| 45658643 | serine protease MucD precursor                                                 | 0.76 | 0.3 | 11 | 0.95   | 0.3   | 11 | 1.06 | 2.4 | 9  | 1.30   | 0.4   | 11 | 0.41 | 0.2 | 9  | 0.28 | 0.1  | 9  |
| 45658651 | hypothetical protein LIC12821                                                  | 0.92 | 0.3 | 6  | 1.61   | 0.3   | 4  | 2.84 | 0.4 | 5  | 1.56   | 1.1   | 5  | 2.67 | 0.5 | 5  | 1.78 | 0.4  | 4  |
| 45658659 | citrate synthase                                                               | 0.99 | 0.3 | 13 | 0.91   | 0.3   | 13 | 1.10 | 0.5 | 13 | 0.98   | 0.2   | 12 | 0.99 | 0.4 | 12 | 1.18 | 0.2  | 12 |
| 45658671 | aspartate aminotransferase                                                     | 0.81 | 0.1 | 9  | 0.77   | 0.2   | 8  | 0.30 | 0.1 | 7  | 1.12   | 0.4   | 9  | 0.39 | 0.1 | 7  | 0.41 | 0.1  | 6  |
| 45658675 | 50S ribosomal protein L17 DNA-directed RNA polymerase alpha subunit            | 1.14 | 0.1 | 4  | 0.60   | 0.2   | 4  | 0.87 | 0.1 | 4  | 0.52   | 0.1   | 4  | 0.88 | 0.4 | 6  | 1.30 | 0.3  | 4  |
| 45658676 | 50S ribosomal protein L17 DNA-directed RNA polymerase alpha subunit            | 1.02 | 0.2 | 11 | 0.80   | 0.2   | 11 | 0.86 | 0.4 | 11 | 0.80   | 0.2   | 11 | 0.91 | 0.5 | 11 | 1.11 | 0.5  | 11 |
| 45658677 | 30S ribosomal protein S4                                                       | 1.00 | 0.1 | 5  | 0.45   | 0.1   | 5  | 0.51 | 0.2 | 5  | 0.52   | 0.1   | 6  | 0.51 | 0.2 | 5  | 0.89 | 0.1  | 4  |
| 45658678 | 30S ribosomal protein S11                                                      | 1.01 | 0.0 | 3  | 0.84   | 0.1   | 3  | 0.53 | 0.1 | 3  | 0.83   | 0.1   | 3  | 0.52 | 0.0 | 3  | 0.63 | 0.1  | 3  |
| 45658679 | 30S ribosomal protein S13                                                      | 0.97 | 0.1 | 6  | 0.33   | 0.1   | 6  | 2.33 | 3.9 | 4  | 0.31   | 0.1   | 5  | 2.27 | 3.8 | 4  | 6.71 | 10.8 | 4  |
| 45658682 | adenylate kinase                                                               | 0.58 | 0.1 | 5  | 0.49   | 0.3   | 7  |      |     |    | 0.99   | 0.7   | 6  |      |     |    |      |      |    |
| 45658683 | preprotein translocase SecY                                                    | 0.86 | 0.4 | 3  | 0.92   | 0.1   | 2  | 1.62 | 0.9 | 3  | 0.85   | 0.1   | 2  | 2.39 | 1.9 | 3  | 1.54 | 1.2  | 2  |
| 45658684 | 50S ribosomal protein L15                                                      | 0.88 | 0.1 | 9  | 0.15   | 0.1   | 7  | 0.06 | 0.0 | 5  | 0.18   | 0.0   | 6  | 0.06 | 0.0 | 5  | 0.50 | 0.3  | 6  |
| 45658686 | 30S ribosomal protein S5                                                       | 0.95 | 0.2 | 8  | 0.57   | 0.1   | 8  | 0.07 | 0.0 | 6  | 0.65   | 0.1   | 8  | 0.07 | 0.1 | 6  | 0.10 | 0.1  | 6  |
| 45658688 | 50S ribosomal protein L6                                                       | 1.21 | 0.1 | 8  | 0.73   | 0.2   | 8  | 0.80 | 0.2 | 7  | 0.59   | 0.1   | 7  | 0.68 | 0.2 | 7  | 0.99 | 0.4  | 7  |
| 45658689 | 30S ribosomal protein S8                                                       | 1.06 | 0.2 | 6  | 0.53   | 0.2   | 5  | 0.19 | 0.1 | 2  | 0.49   | 0.1   | 5  | 0.16 | 0.1 | 2  | 0.23 | 0.2  | 2  |
| 45658690 | 30S ribosomal protein S14                                                      | 0.73 | 0.0 | 2  | 0.13   | 0.1   | 2  |      |     |    | 0.18   | 0.1   | 2  |      |     |    |      |      |    |
| 45658691 | 50S ribosomal protein L5                                                       | 1.30 | 0.1 | 3  | 0.72   | 0.0   | 3  | 0.33 | 0.1 | 2  | 0.55   | 0.1   | 3  | 0.26 | 0.1 | 2  | 0.45 | 0.1  | 2  |

|          |                                                               |      |     |    |      |     |    |       |     |    |      |     |      |      |     |    |      |     |    |
|----------|---------------------------------------------------------------|------|-----|----|------|-----|----|-------|-----|----|------|-----|------|------|-----|----|------|-----|----|
| 45658692 | 50S ribosomal protein L24                                     | 0.92 | 0.1 | 4  | 0.48 | 0.2 | 4  |       |     |    | 0.51 | 0.2 | 4    |      |     |    |      |     |    |
| 45658693 | 50S ribosomal protein L14                                     | 0.97 | 0.1 | 4  | 0.59 | 0.1 | 4  | 0.20  | 0.2 | 3  | 0.62 | 0.1 | 4    | 0.30 | 0.3 | 3  | 0.26 | 0.2 | 3  |
| 45658694 | 30S ribosomal protein S17                                     | 1.23 | 0.3 | 2  |      |     |    | 0.54  | 0.1 | 2  |      |     | 0.44 | 0.0  | 2   |    |      |     |    |
| 45658695 | 50S ribosomal protein L29                                     | 0.54 | 0.2 | 7  |      |     |    |       |     |    |      |     |      |      |     |    |      |     |    |
| 45658696 | 50S ribosomal protein L16                                     | 1.01 | 0.4 | 8  | 0.88 | 0.2 | 7  | 0.12  | 0.1 | 4  | 0.64 | 0.1 | 7    | 0.19 | 0.2 | 4  | 0.11 | 0.1 | 3  |
| 45658697 | 30S ribosomal protein S3                                      | 1.20 | 0.2 | 5  | 0.79 | 0.2 | 7  | 0.55  | 0.2 | 7  | 0.61 | 0.2 | 7    | 0.45 | 0.2 | 7  | 0.71 | 0.2 | 8  |
| 45658698 | 50S ribosomal protein L22                                     | 1.22 | 0.2 | 5  | 1.02 | 0.1 | 5  | 0.32  | 0.1 | 3  | 0.81 | 0.2 | 5    | 0.25 | 0.1 | 3  | 0.32 | 0.1 | 3  |
| 45658700 | 50S ribosomal protein L2                                      | 1.17 | 0.2 | 12 | 0.83 | 0.2 | 11 | 0.37  | 0.2 | 11 | 0.72 | 0.1 | 12   | 0.27 | 0.1 | 10 | 0.40 | 0.2 | 11 |
| 45658701 | 50S ribosomal protein L23                                     | 0.82 | 0.0 | 3  | 0.47 | 0.0 | 3  | 0.16  | 0.1 | 3  | 0.57 | 0.1 | 3    | 0.20 | 0.1 | 3  | 0.36 | 0.1 | 3  |
| 45658702 | 50S ribosomal protein L4                                      | 1.18 | 0.1 | 7  | 0.74 | 0.2 | 7  | 0.33  | 0.2 | 6  | 0.63 | 0.2 | 7    | 0.33 | 0.2 | 7  | 0.40 | 0.1 | 6  |
| 45658703 | 50S ribosomal protein L3                                      | 0.97 | 0.2 | 6  | 0.77 | 0.1 | 6  | 0.16  | 0.0 | 5  | 0.68 | 0.1 | 6    | 0.16 | 0.1 | 5  | 0.21 | 0.0 | 5  |
| 45658704 | 30S ribosomal protein S10                                     | 0.65 | 0.1 | 6  | 0.12 | 0.0 | 4  |       |     |    | 0.17 | 0.0 | 4    |      |     |    |      |     |    |
| 45658705 | elongation factor Tu carbamoyl-phosphate synthase large chain | 0.87 | 0.2 | 25 | 1.14 | 0.3 | 27 | 0.71  | 0.4 | 29 | 1.35 | 0.4 | 26   | 0.76 | 0.3 | 25 | 0.68 | 0.5 | 29 |
| 45658713 | hypothetical protein LIC12886                                 | 1.00 | 0.2 | 7  | 0.68 | 0.2 | 7  | 0.41  | 0.1 | 7  | 0.72 | 0.2 | 7    | 0.37 | 0.1 | 6  | 0.56 | 0.1 | 5  |
| 45658716 | hypothetical protein LIC12886                                 | 0.74 | 0.2 | 3  | 0.39 | 0.2 | 3  |       |     |    | 0.56 | 0.3 | 3    |      |     |    |      |     |    |
| 45658725 | putative lipoprotein                                          | 1.44 | 0.4 | 2  | 1.31 | 0.1 | 2  | 0.57  | 0.0 | 2  | 0.95 | 0.3 | 2    | 0.41 | 0.1 | 2  | 0.44 | 0.0 | 2  |
| 45658739 | aspartokinase                                                 | 0.66 | 0.1 | 5  | 0.83 | 0.3 | 6  | 0.78  | 0.8 | 2  | 1.00 | 0.2 | 5    | 0.66 | 0.4 | 2  | 0.72 | 0.5 | 2  |
| 45658750 | methyl-accepting chemotaxis protein                           | 1.19 | 0.2 | 36 | 1.74 | 0.5 | 35 | 7.13  | 3.0 | 38 | 1.48 | 0.5 | 37   | 5.62 | 2.2 | 39 | 3.96 | 1.3 | 38 |
| 45658753 | citrate synthase                                              |      |     |    |      |     |    |       |     |    |      |     |      | 2.37 | 2.9 | 2  |      |     |    |
| 45658764 | hypothetical protein LIC12936                                 | 1.33 | 0.7 | 5  | 0.87 | 0.4 | 5  | 2.28  | 0.6 | 4  | 0.72 | 0.3 | 5    | 2.46 | 1.0 | 5  | 3.65 | 1.3 | 5  |
| 45658765 | anti-sigma factor antagonist                                  | 0.64 | 0.0 | 2  | 0.96 | 0.0 | 2  |       |     |    | 1.51 | 0.0 | 2    |      |     |    |      |     |    |
| 45658772 | 30S ribosomal protein S1                                      |      |     |    | 0.70 | 0.3 | 2  |       |     |    |      |     |      |      |     |    |      |     |    |
| 45658785 | hypothetical protein LIC12958                                 | 1.10 | 0.2 | 6  | 0.50 | 0.1 | 5  | 1.03  | 0.3 | 5  | 0.44 | 0.1 | 5    | 0.90 | 0.2 | 5  | 2.06 | 1.1 | 6  |
| 45658793 | LipL41                                                        | 0.96 | 0.5 | 25 | 1.22 | 0.7 | 26 | 1.56  | 0.5 | 25 | 1.34 | 0.6 | 25   | 1.73 | 0.4 | 22 | 1.43 | 0.4 | 22 |
| 45658806 | hypothetical protein LIC12979                                 | 1.75 | 0.4 | 4  | 1.60 | 0.5 | 4  | 5.71  | 2.8 | 5  | 1.28 | 0.3 | 4    | 4.34 | 1.0 | 4  | 3.06 | 1.5 | 5  |
| 45658819 | sulfate Permease                                              |      |     |    |      |     |    |       |     |    | 0.99 | 0.7 | 2    | 3.61 | 1.5 | 2  | 4.14 | 1.4 | 2  |
| 45658836 | acyl-CoA dehydrogenase                                        | 0.97 | 0.1 | 7  | 1.28 | 0.4 | 7  | 0.86  | 0.3 | 6  | 1.21 | 0.3 | 7    | 0.74 | 0.2 | 6  | 0.67 | 0.3 | 7  |
| 45658844 | acriflavine resistance                                        | 1.36 | 0.3 | 15 | 1.44 | 0.3 | 12 | 3.18  | 1.0 | 16 | 1.13 | 0.3 | 13   | 2.42 | 0.7 | 15 | 2.08 | 0.3 | 11 |
| 45658872 | UDP glucosamine N-acyltransferase                             | 0.95 | 0.2 | 4  | 0.85 | 0.1 | 4  | 0.33  | 0.1 | 3  | 0.93 | 0.2 | 4    | 0.41 | 0.2 | 3  | 0.40 | 0.1 | 3  |
| 45658876 | hypothetical protein LIC13050                                 | 0.34 | 0.1 | 16 | 0.60 | 0.3 | 16 |       |     |    | 1.78 | 0.9 | 16   |      |     |    |      |     |    |
| 45658885 | putative lipoprotein                                          | 0.61 | 0.3 | 4  | 1.59 | 0.3 | 4  |       |     |    | 2.90 | 1.2 | 4    |      |     |    |      |     |    |
| 45658886 | LipL36                                                        | 0.51 | 0.2 | 17 | 0.57 | 0.2 | 17 | 0.01  | 0.0 | 3  | 1.35 | 0.9 | 18   | 0.19 | 0.3 | 3  | 0.02 | 0.0 | 3  |
| 45658897 | hypothetical protein LIC13071                                 | 0.54 | 0.2 | 5  | 0.77 | 0.9 | 3  | 1.22  | 0.1 | 5  | 0.47 | 0.1 | 3    | 1.97 | 1.2 | 6  | 3.15 | 2.2 | 3  |
| 45658899 | transcriptional regulator (TetR family)                       | 2.29 | 1.5 | 3  | 2.60 | 1.2 | 3  | 11.83 | 4.7 | 3  | 1.34 | 0.4 | 4    | 5.39 | 3.4 | 4  | 3.91 | 1.6 | 4  |
| 45658900 | acriflavin resistance                                         | 0.51 | 0.1 | 7  | 0.62 | 0.2 | 8  |       |     |    | 1.44 | 1.1 | 8    |      |     |    |      |     |    |
| 45658915 | hypothetical protein LIC13089                                 | 1.65 | 0.3 | 4  | 1.19 | 0.3 | 4  | 2.76  | 1.1 | 3  | 0.94 | 0.3 | 4    | 1.85 | 0.9 | 3  | 2.76 | 0.6 | 3  |
| 45658916 | acriflavin resistance                                         | 1.28 | 0.7 | 3  | 1.64 | 1.0 | 2  |       |     |    | 1.09 | 0.1 | 2    |      |     |    |      |     |    |
| 45658918 | PfaP                                                          | 1.20 | 0.4 | 6  | 1.18 | 0.2 | 5  | 0.71  | 0.4 | 4  | 0.87 | 0.3 | 6    | 0.50 | 0.2 | 4  | 0.58 | 0.2 | 4  |
| 45658945 | hypothetical protein LIC13122                                 | 0.88 | 0.4 | 4  | 0.62 | 0.2 | 4  |       |     |    | 0.79 | 0.3 | 4    |      |     |    |      |     |    |
| 45658946 | hypothetical protein LIC13123                                 | 0.94 | 0.3 | 5  | 1.02 | 0.5 | 5  | 2.89  | 1.7 | 5  | 0.92 | 0.2 | 5    | 3.10 | 1.3 | 5  | 3.01 | 1.1 | 6  |
| 45658951 | methionyl-tRNA synthetase                                     | 0.84 | 0.5 | 2  | 1.01 | 0.5 | 2  | 0.35  | 0.3 | 2  | 1.31 | 0.2 | 3    | 0.38 | 0.1 | 2  | 0.32 | 0.1 | 2  |
| 45658958 | acyl-CoA dehydrogenase                                        | 1.08 | 0.5 | 4  | 0.75 | 0.2 | 4  | 1.23  | 0.2 | 3  | 0.78 | 0.3 | 4    | 1.32 | 0.6 | 3  | 1.23 | 0.6 | 4  |
| 45658969 | hypothetical protein LIC13147                                 | 0.84 | 0.2 | 2  | 1.20 | 0.6 | 2  |       |     |    | 1.38 | 0.4 | 2    |      |     |    |      |     |    |
| 45658976 | UDP-N-acetylglucosamine acyltransferase                       | 1.12 | 0.4 | 8  | 0.93 | 0.5 | 7  | 1.05  | 0.5 | 7  | 1.11 | 0.3 | 7    | 0.80 | 0.4 | 6  | 1.00 | 0.8 | 6  |
| 45658984 | phospho-2-dehydro-3-deoxyheptonate aldolase Chorismate mutase | 0.84 | 0.1 | 10 | 0.69 | 0.4 | 6  | 0.46  | 0.2 | 8  | 1.01 | 0.6 | 7    | 0.56 | 0.1 | 8  | 0.54 | 0.0 | 4  |
| 45658988 | hypothetical protein LIC13166                                 | 0.92 | 0.2 | 19 | 0.70 | 0.1 | 21 | 2.66  | 0.9 | 22 | 0.74 | 0.2 | 18   | 2.72 | 0.8 | 21 | 3.70 | 1.1 | 20 |
| 45658990 | GDP-mannose 4,6-dehydratase                                   | 1.96 | 1.1 | 6  | 1.88 | 1.1 | 4  | 5.24  | 3.3 | 3  | 0.86 | 0.6 | 4    | 1.77 | 1.1 | 3  | 3.13 | 1.5 | 3  |
| 45658998 | Tas                                                           | 1.56 | 0.7 | 5  | 0.86 | 0.2 | 3  |       |     |    | 0.62 | 0.2 | 3    |      |     |    | 0.60 | 0.5 | 2  |
| 45659005 | methyl-accepting chemotaxis-like                              | 0.58 | 0.1 | 12 | 0.15 | 0.0 | 8  | 0.24  | 0.1 | 10 | 0.22 | 0.0 | 8    | 0.39 | 0.1 | 10 | 1.62 | 0.5 | 8  |
| 45659016 | cholesterol oxidase                                           | 1.41 | 0.4 | 6  | 1.43 | 0.4 | 5  | 1.62  | 0.2 | 6  | 0.84 | 0.5 | 6    | 1.19 | 0.4 | 7  | 1.27 | 0.5 | 7  |
| 45659018 | putative O-methyl transferase                                 | 1.05 | 0.2 | 6  | 0.82 | 0.4 | 2  | 1.91  | 0.5 | 5  | 0.85 | 0.3 | 2    | 1.70 | 0.8 | 6  | 2.32 | 0.5 | 2  |
| 45659023 | adenylate/guanylate cyclase                                   | 1.53 | 0.9 | 4  | 0.64 | 0.1 | 4  | 0.26  | 0.1 | 3  | 0.58 | 0.2 | 3    | 0.25 | 0.1 | 3  | 0.42 | 0.1 | 3  |
| 45659034 | hypothetical protein LIC13212                                 |      |     |    |      |     |    |       |     |    | 1.23 | 0.0 | 2    | 2.53 | 0.0 | 2  | 2.06 | 0.1 | 2  |
| 45659041 | phenylalanyl-tRNA synthetase beta chain                       | 0.83 | 0.3 | 2  |      |     |    | 1.21  | 1.1 | 2  |      |     | 1.30 | 0.9  | 2   |    |      |     |    |
| 45659044 | lauroyl/myristoyl acyltransferase                             | 1.31 | 0.0 | 2  | 1.11 | 0.5 | 2  | 0.79  | 0.6 | 2  | 0.85 | 0.4 | 2    | 0.60 | 0.4 | 2  | 0.66 | 0.2 | 2  |
| 45659052 | ATP-dependent RNA helicase                                    | 1.48 | 0.4 | 5  | 1.02 | 0.5 | 5  | 0.93  | 0.1 | 4  | 0.83 | 0.3 | 5    | 0.53 | 0.1 | 4  | 0.74 | 0.2 | 4  |
| 45659065 | isocitrate dehydrogenase                                      | 0.85 | 0.1 | 11 | 0.72 | 0.2 | 11 | 0.46  | 0.2 | 9  | 0.85 | 0.2 | 10   | 0.59 | 0.3 | 9  | 0.71 | 0.3 | 9  |
| 45659071 | apolipoprotein n-acyltransferase                              | 1.15 | 0.1 | 6  | 1.09 | 0.1 | 6  | 1.40  | 0.3 | 5  | 0.90 | 0.1 | 8    | 1.38 | 0.3 | 7  | 1.37 | 0.3 | 6  |
| 45659078 | NADH oxidoreductase                                           | 1.48 | 0.3 | 4  | 1.08 | 0.3 | 4  | 1.56  | 0.3 | 4  | 0.73 | 0.2 | 4    | 1.10 | 0.3 | 4  | 1.55 | 0.5 | 4  |
| 45659084 | ribonuclease D                                                | 1.12 | 0.2 | 3  | 1.08 | 0.5 | 3  |       |     |    | 0.94 | 0.3 | 3    |      |     |    |      |     |    |
| 45659096 | hypothetical protein LIC13275                                 | 0.66 | 0.3 | 2  | 0.53 | 0.2 | 2  |       |     |    | 0.81 | 0.0 | 2    |      |     |    |      |     |    |

|          |                                                                               |      |     |    |      |     |    |      |     |    |      |     |      |      |     |    |      |     |    |
|----------|-------------------------------------------------------------------------------|------|-----|----|------|-----|----|------|-----|----|------|-----|------|------|-----|----|------|-----|----|
| 45659114 | hypothetical protein LIC13293                                                 | 0.51 | 0.0 | 2  | 0.71 | 0.3 | 3  |      |     |    | 1.08 | 0.5 | 2    |      |     |    |      |     |    |
| 45659118 | hypothetical protein LIC13297                                                 | 0.94 | 0.1 | 2  |      |     |    |      |     |    |      |     |      |      |     |    |      |     |    |
| 45659119 | 3-hydroxyacyl-CoA dehydrogenase                                               | 0.88 | 0.1 | 9  | 0.89 | 0.2 | 8  | 0.27 | 0.2 | 8  | 0.98 | 0.2 | 7    | 0.35 | 0.2 | 7  | 0.33 | 0.2 | 8  |
| 45659120 | acetyl-CoA acetyltransferase phenylalanyl-tRNA synthetase alpha chain         | 0.92 | 0.0 | 8  | 0.78 | 0.3 | 8  | 0.30 | 0.1 | 7  | 0.83 | 0.3 | 9    | 0.33 | 0.2 | 7  | 0.29 | 0.1 | 7  |
| 45659129 |                                                                               | 1.43 | 0.6 | 3  | 1.00 | 0.0 | 2  | 0.36 | 0.2 | 2  | 0.65 | 0.3 | 2    | 0.35 | 0.2 | 2  |      |     |    |
| 45659132 | hypothetical protein LIC13313                                                 | 1.13 | 0.2 | 7  | 1.18 | 0.3 | 7  | 1.75 | 0.4 | 6  | 1.01 | 0.2 | 7    | 1.41 | 0.4 | 6  | 1.32 | 0.4 | 6  |
| 45659133 | hypothetical protein LIC13314                                                 | 1.47 | 0.2 | 15 | 1.54 | 0.9 | 17 | 0.99 | 0.5 | 16 | 1.04 | 0.2 | 17   | 0.68 | 0.2 | 13 | 0.68 | 0.4 | 16 |
| 45659135 | ABC transporter, ATP-binding protein                                          | 1.09 | 0.3 | 11 | 1.29 | 0.4 | 12 | 1.12 | 0.6 | 11 | 1.19 | 0.3 | 10   | 0.92 | 0.6 | 10 | 0.83 | 0.4 | 12 |
| 45659137 | fatty acid synthase subunit beta                                              | 0.58 | 0.1 | 11 | 0.61 | 0.2 | 10 | 0.31 | 0.1 | 9  | 1.01 | 0.2 | 11   | 0.47 | 0.2 | 9  | 0.38 | 0.1 | 9  |
| 45659145 | nucleoside diphosphate kinase                                                 | 0.65 | 0.1 | 4  | 0.81 | 0.1 | 4  | 0.14 | 0.1 | 3  | 1.26 | 0.3 | 4    | 0.24 | 0.2 | 3  | 0.18 | 0.1 | 3  |
| 45659147 | isocitrate dehydrogenase                                                      | 1.05 | 0.1 | 2  | 0.75 | 0.1 | 2  | 1.01 | 0.3 | 2  | 0.71 | 0.1 | 2    | 0.97 | 0.3 | 2  | 1.39 | 0.6 | 2  |
| 45659160 | putative lipoprotein                                                          | 1.85 | 1.0 | 3  | 2.52 | 0.7 | 2  | 2.01 | 1.3 | 2  | 1.21 | 0.3 | 2    | 1.63 | 1.2 | 2  |      |     |    |
| 45659166 | DNA gyrase subunit A                                                          | 1.11 | 0.4 | 10 | 1.10 | 0.4 | 10 | 1.07 | 0.5 | 9  | 1.11 | 0.5 | 9    | 0.88 | 0.4 | 7  | 1.06 | 0.5 | 9  |
| 45659167 | DNA gyrase subunit B                                                          | 0.95 | 0.2 | 13 | 0.84 | 0.2 | 13 | 1.10 | 0.4 | 13 | 0.90 | 0.2 | 14   | 1.20 | 0.4 | 13 | 1.36 | 0.5 | 14 |
| 45659170 | hypothetical protein LIC13351                                                 | 0.71 | 0.1 | 8  | 1.01 | 0.3 | 8  | 0.27 | 0.1 | 7  | 1.52 | 0.5 | 8    | 0.40 | 0.1 | 7  | 0.27 | 0.1 | 6  |
| 45659172 | L-amino acid oxidase                                                          | 0.33 | 0.1 | 2  |      |     |    | 0.55 | 0.1 | 2  | 0.88 | 0.6 | 2    | 1.74 | 0.6 | 2  | 1.18 | 0.2 | 2  |
| 45659186 | sulfite reductase                                                             | 0.98 | 0.1 | 9  | 0.67 | 0.2 | 11 | 0.32 | 0.1 | 8  | 0.71 | 0.1 | 8    | 0.40 | 0.1 | 7  | 0.49 | 0.1 | 8  |
| 45659189 | sulfate adenyltransferase subunit 1                                           | 1.07 | 0.2 | 3  | 0.32 | 0.1 | 2  | 0.27 | 0.1 | 2  | 0.34 | 0.1 | 2    | 0.28 | 0.1 | 2  | 0.89 | 0.5 | 2  |
| 45659209 | polysaccharide deacetylase                                                    | 0.46 | 0.0 | 3  | 0.56 | 0.2 | 4  | 2.01 | 0.7 | 2  | 0.95 | 0.1 | 3    |      |     |    | 3.62 | 2.8 | 2  |
| 45659210 | ketol-acid reductoisomerase methyl-accepting chemotaxis transmembrane protein | 1.00 | 0.5 | 11 | 0.80 | 0.3 | 11 | 0.72 | 0.2 | 10 | 0.84 | 0.4 | 11   | 0.79 | 0.2 | 10 | 0.90 | 0.3 | 10 |
| 45659211 |                                                                               | 2.23 | 1.8 | 3  | 1.57 | 1.3 | 3  | 2.93 | 3.1 | 3  | 0.68 | 0.1 | 3    | 1.13 | 0.3 | 3  | 1.65 | 0.4 | 3  |
| 45659221 | acetyl-CoA synthase                                                           | 1.01 | 0.4 | 10 | 1.13 | 0.6 | 10 | 5.43 | 8.7 | 9  | 1.16 | 0.8 | 10   | 2.36 | 2.0 | 8  | 2.22 | 2.4 | 8  |
| 45659227 | hypothetical protein LIC13410                                                 | 1.08 | 0.1 | 3  | 0.60 | 0.2 | 3  | 2.21 | 1.2 | 3  | 0.56 | 0.2 | 3    | 2.01 | 1.0 | 3  | 4.58 | 4.2 | 3  |
| 45659230 | 5'-phosphoribosylglycinamide transformylase                                   | 1.30 | 0.6 | 5  | 0.91 | 0.6 | 4  |      |     |    | 0.78 | 0.4 | 4    |      |     |    |      |     |    |
| 45659251 | hypothetical protein LIC13434                                                 | 1.15 | 0.5 | 6  | 0.53 | 0.4 | 5  |      |     |    | 0.78 | 0.6 | 7    | 0.09 | 0.0 | 2  | 0.11 | 0.1 | 2  |
| 45659259 | glutathione peroxidase                                                        | 1.02 | 0.3 | 3  | 0.89 | 0.6 | 4  |      |     |    | 0.89 | 0.3 | 4    |      |     |    |      |     |    |
| 45659260 | hypothetical protein LIC13443                                                 | 1.15 | 0.2 | 3  |      |     |    |      |     |    |      |     |      |      |     |    |      |     |    |
| 45659266 | hypothetical protein LIC13449                                                 |      |     |    | 0.78 | 0.3 | 2  |      |     |    |      |     |      |      |     |    |      |     |    |
| 45659268 | flagellar hook-associated protein                                             |      |     |    |      |     |    |      |     |    |      |     |      |      |     |    | 4.84 | 0.5 | 2  |
| 45659286 | ferredoxin--NADP reductase                                                    | 0.68 | 0.1 | 5  | 1.06 | 0.2 | 5  | 0.49 | 0.1 | 5  | 1.60 | 0.4 | 5    | 0.74 | 0.2 | 5  | 0.46 | 0.0 | 5  |
| 45659289 | DNA polymerase III gamma subunit                                              | 1.42 | 1.0 | 5  | 1.34 | 0.5 | 6  | 0.41 | 0.1 | 3  | 0.85 | 0.4 | 6    | 0.29 | 0.1 | 2  | 0.45 | 0.1 | 2  |
| 45659295 | seryl-tRNA synthetase                                                         | 1.13 | 0.5 | 4  | 1.23 | 0.6 | 4  | 0.94 | 0.2 | 2  | 1.06 | 0.2 | 4    | 0.83 | 0.3 | 2  | 0.90 | 0.5 | 2  |
| 45659297 | hypothetical protein LIC13482                                                 | 0.43 | 0.0 | 2  |      |     |    | 1.14 | 1.2 | 3  |      |     | 1.11 | 0.1  | 2   |    |      |     |    |
| 45659304 | metallopeptidase branched-chain amino acid aminotransferase                   | 1.25 | 0.4 | 7  | 1.63 | 0.5 | 6  | 3.49 | 1.1 | 6  | 1.05 | 0.5 | 6    | 2.14 | 1.0 | 6  | 2.78 | 1.7 | 8  |
| 45659307 |                                                                               | 0.78 | 0.1 | 2  | 0.97 | 0.2 | 2  | 0.64 | 0.2 | 2  | 1.24 | 0.1 | 2    | 0.81 | 0.2 | 2  | 0.65 | 0.1 | 2  |

**Supplementary Table 3.** Relative quantification based on MS1 intensities. From an original data set containing 1081 proteins, 747 were quantified with high confidence: At least 2 independent proteotypic peptides were observed, whereby semi-tryptic peptides were excluded from the analysis. For each state the ratios (e.g. C2H for Control to Heat-shocked ratio), standard deviations (Std) and number of observed proteotypic features (NF) is given. Abbreviations: C: control, H: heat-shocked, AB: antibiotics-treated, S: starved.

## Supplementary References

1. Keller, A., Nesvizhskii, A.I., Kolker, E., and Aebersold, R., *Analytical chemistry* 74 (20), 5383-5392 (2002).
2. Desiere, F. et al., *Nucleic acids research* 34 (Database issue), D655-658 (2006).
3. Ashburner, M. et al., *Nature genetics* 25 (1), 25-29 (2000).
4. Frees, D., Savijoki, K., Varmanen, P., and Ingmer, H., *Molecular microbiology* 63 (5), 1285-1295 (2007).
5. Shalit, I., Barnea, A., and Shahar, A., *Antimicrobial agents and chemotherapy* 33 (5), 788-789 (1989).
6. Dwyer, D.J., Kohanski, M.A., Hayete, B., and Collins, J.J., *Molecular systems biology* 3, 91 (2007).
7. Reckinger, A.R., Jeong, K.S., Khodursky, A.B., and Hiasa, H., *Nucleic acids research* 35 (1), 79-86 (2007).
8. Malmstrom, J. et al., *Nature* 460 (7256), 762-765 (2009).
9. Lange, V. et al., *Mol Cell Proteomics* (2008).
10. Baxter, W.T., Grassucci, R.A., Gao, H., and Frank, J., *J Struct Biol* 166 (2), 126-132 (2009).
11. Kennaway, C.K. et al., *The Journal of biological chemistry* 280 (39), 33419-33425 (2005).
12. Kim, R., Kim, K.K., Yokota, H., and Kim, S.H., *Proceedings of the National Academy of Sciences of the United States of America* 95 (16), 9129-9133 (1998).
